# Supplementary material for: Objectively-assessed and self-reported sedentary time in relation to multiple socioeconomic status indicators among adults in England: a cross-sectional study
Source: PubMed Central journal article supplement — BMJ Open. 2014 Nov 5;4(11):e006034. doi: 10.1136/bmjopen-2014-006034 (PMC4225231; doi:10.1136/bmjopen-2014-006034), 2014-11-05
Supplement: bmjopen-2014-006034.draft_revisions.pdf [file bmjopen-2014-006034.draft_revisions.pdf]

# BMJ Open

## Objectively-assessed and self-reported sedentary time in relation to multiple socioeconomic status indicators among adults in England

|                                 |                                                                                                                                                                                                                                                                                                                                                                                                 |
|---------------------------------|-------------------------------------------------------------------------------------------------------------------------------------------------------------------------------------------------------------------------------------------------------------------------------------------------------------------------------------------------------------------------------------------------|
| Journal:                        | <i>BMJ Open</i>                                                                                                                                                                                                                                                                                                                                                                                 |
| Manuscript ID:                  | bmjopen-2014-006034                                                                                                                                                                                                                                                                                                                                                                             |
| Article Type:                   | Research                                                                                                                                                                                                                                                                                                                                                                                        |
| Date Submitted by the Author:   | 03-Jul-2014                                                                                                                                                                                                                                                                                                                                                                                     |
| Complete List of Authors:       | Stamatakis, Emmanuel; University of Sydney, Exercise and Sport Sciences & Charles Perkins Centre<br>Coombs, Ngaire; University of Southampton, Social Sciences<br>Rowlands, Alex; University of South Australia, Division of Health Sciences<br>Shelton, Nicola; University College London, Epidemiology and Public Health<br>Hillsdon, Melvyn; University of Exeter, Sport and Health Sciences |
| <b>Primary Subject Heading</b>: | Epidemiology                                                                                                                                                                                                                                                                                                                                                                                    |
| Secondary Subject Heading:      | Public health, Epidemiology, Sports and exercise medicine                                                                                                                                                                                                                                                                                                                                       |
| Keywords:                       | EPIDEMIOLOGY, PUBLIC HEALTH, SOCIAL MEDICINE                                                                                                                                                                                                                                                                                                                                                    |
|                                 |                                                                                                                                                                                                                                                                                                                                                                                                 |

SCHOLARONE™  
Manuscripts

1  
2  
3  
4  
5 **Title:** Objectively-assessed and self-reported sedentary time in relation to multiple  
6 socioeconomic status indicators among adults in England  
7

8  
9 **Running title:** Sedentary time and socioeconomic status  
10

11 **Authors:** Emmanuel Stamatakis<sup>1 2 3</sup>, Ngaire Coombs<sup>3 4</sup>, Alex Rowlands<sup>5</sup>, Nicola Shelton<sup>3</sup>,  
12 Melvyn Hillsdon<sup>6</sup>.  
13

14  
15  
16 <sup>1</sup> Exercise and Sport Sciences, Faculty of Health Sciences, University of Sydney, Sydney,  
17 Australia  
18

19  
20 <sup>2</sup> Charles Perkins Centre, University of Sydney, Australia  
21

22  
23 <sup>3</sup> PARG (Physical Activity Research Group), Department of Epidemiology and Public Health,  
24 University College London, London, UK  
25

26  
27 <sup>4</sup> Department of Social Sciences, University of Southampton, UK  
28

29  
30 <sup>5</sup> Division of Health Sciences, University of South Australia, Australia  
31

32  
33 <sup>6</sup> Sport and Health Sciences, College of Life and Environmental Sciences, University of  
34 Exeter, UK  
35

36  
37  
38  
39 Correspondence: Emmanuel Stamatakis, Charles Perkins Centre, University of Sydney ,  
40 Johns Hopkins Drive, Sydney, NSW 2050, Australia. Email:  
41 [emmanuel.stamatakis@sydney.edu.au](mailto:emmanuel.stamatakis@sydney.edu.au), Telephone: +61 293519668.  
42  
43  
44  
45  
46  
47

48 **Wordcount:**

49  
50 Abstract: 242 words  
51

52  
53 Main text: 3455 words  
54  
55  
56  
57  
58  
59  
60

## Abstract

**Objectives:** To examine the associations between socioeconomic position (SEP) and multi-domain self-reported and objectively-assessed sedentary time (ST). **Design:** cross-sectional; **Setting:** general population households in England. Participants: 2289 adults aged 16 and over who participated in the 2008 Health Survey for England. **Outcomes:** accelerometer-measured sedentary time, television time, non-television leisure-time sitting and occupational sitting/standing. We examined multivariable associations between household income, social class, education, area deprivation each SEP indicator (including a 5-point composite SEP score computed by aggregating individual SEP indicators) and each ST indicator using generalised linear models. **Results:** Accelerometry-measured total ST and occupational sitting/standing were positively associated with SEP score and most of its constituent SEP indicators, while television time was negatively associated with SEP score and education level. Area-level deprivation was largely unrelated to ST. Those in the lowest composite SEP group spent 64 (95% CIs: 52 to 76) and 72 (48 to 98), fewer minutes/day in total ST and occupational sitting/standing compared to those in the top SEP group, and an additional 48 (35 to 60) minutes/day watching television ( $p < 0.001$  for linear trend). Stratified analyses showed that these associations between composite SEP score and total ST were evident only among participants who were in employment. **Conclusions:** Occupational sitting seems to drive the positive association between socioeconomic position and total sedentary time. Lower socioeconomic position is linked to higher TV viewing times. TV viewing, but not overall sedentary time, may be a contributor to socioeconomic inequalities in health in England.

## Article summary

### *Strengths and limitations of this study:*

- First study of its kind to use objective sedentary behaviour measurements
- Broad range of self-reported sedentary behaviour types
- Broad set of socioeconomic status markers including are-level deprivation
- The main limitation is the cross-sectional design

## Keywords

Socioeconomic status; television; sedentary behavior; inequality; physical activity; accelerometer;

## Introduction

Recent studies show that sedentary time (defined as an energy expenditure rate below 1.5 metabolic equivalents<sup>1</sup>, often characterised by activities involving sitting) is linked to increased all-cause<sup>2-5</sup> and cardiovascular<sup>2,3</sup> mortality risk independently of leisure-time physical activity participation. Television viewing, one of the most common sedentary time (ST) activities, has been specifically linked to all-cause and cardiovascular mortality and type 2 diabetes<sup>6</sup>. Objective data show that adults in England spend approximately nine to 10 hours a day being sedentary on average, out of which approximately 4 hours/day is TV watching<sup>7,8</sup>. Assuming that the average waking day lasts for 16 hrs, total sedentary time accounts for some 55-65% of total waking time. For working age adults a substantial proportion of total sedentary time takes place while at work, 56% of working English men and 50% of women report more than 5 hrs /day being sedentary while at work<sup>7</sup>.

Socioeconomic position (SEP) is a broad term that encompasses a range of characteristics, including occupational type and employment status, purchasing capacity and ownership, educational level and deprivation. Accordingly, there are several SEP indices each of which measures different aspects of social standing. Overall, SEP is a strong predictor of premature mortality and chronic disease occurrence including cardiovascular disease (CVD)<sup>9</sup> and diabetes<sup>10</sup> with individuals in lower SEP being considerably more likely to fall ill and die prematurely. Although there is no consensus on the origins of the socioeconomic gradient in health, one of the suggested pathways involves higher prevalence of poor health behaviors (e.g. physical inactivity and smoking) among lower socioeconomic groups<sup>11</sup>.

We have previously shown that lower SEP is linked consistently with increased TV viewing and other recreational screen time in Scottish adults<sup>12</sup>, a finding that has been confirmed by studies in other countries such as Belgium<sup>12,13</sup>, Australia<sup>14,15</sup>, and the US<sup>16</sup> that used TV as a

1  
2  
3 proxy for ST. However, these findings are not necessarily generalizable to overall sedentary  
4  
5 or sitting time because TV viewing is a complex exposure that seems to be a poor index of  
6  
7 overall ST<sup>17</sup>. In a recent study comparing associations between TV time and objectively  
8  
9 measured sedentary time, associations were of fair magnitude, but were not consistent across  
10  
11 population sub-groups<sup>18</sup>. The results of the few studies that looked at overall (self-reported)  
12  
13 sitting in relation to SEP are inconsistent. Higher social position was linked to higher overall  
14  
15 sitting time among Australian women<sup>19</sup> but education level was unrelated to sitting time  
16  
17 among Portuguese adults<sup>20</sup>. Objective measuring methodologies such as accelerometers and  
18  
19 inclinometers can give more comprehensive and complete estimates of total sedentary  
20  
21 behavior than partial self-reported indices such as TV viewing, or self-reported total sitting  
22  
23 time, which may be more difficult to recall than TV viewing and therefore be subject to more  
24  
25 measurement error. Besides, SEP characteristics that relate to occupational class and income  
26  
27 will naturally have an impact on work time sitting. For example, manual unskilled workers  
28  
29 normally spend less time sitting during work than professionals in managerial office-based  
30  
31 jobs<sup>21</sup>. Similarly, higher incomes and the associated spending capacity might impact on the  
32  
33 time spent sitting driving a car or commuting. To our knowledge, no study has looked at the  
34  
35 associations between SEP defined using education, occupational class, income and area  
36  
37 deprivation indices, and SB estimated using self-reported sitting across different domains as  
38  
39 well as objective methods.  
40  
41  
42  
43  
44

45  
46 The aim of this study was to look at the associations between multiple SEP indicators and  
47  
48 self-reported indices of sitting time and SB as well as objectively-assessed total SB time. We  
49  
50 used data from one of the largest European accelerometry general population studies, the  
51  
52 2008 Health Survey for England.  
53  
54

## 55 56 **Methods** 57 58 59 60

### ***Study Sample***

The Health Survey for England (HSE) is a repeated nationally representative study of individuals living in private households in England. We drew our sample from the 2008 HSE which had a special focus on physical activity and sedentary behavior. The sample is drawn using multi-stage stratified probability sampling with postcode sectors as the primary sampling unit. More details of the sample design are available elsewhere<sup>8</sup>. The household response rate was 64% for the main sample, and 73% for the accelerometer sub-sample<sup>8</sup>. We included adults aged 16 and over who had both valid accelerometry and self-reported SB data. Participants provided written informed consent. An abridged methods section is presented here: the full methods section with more information can be found in supplementary file S1 (Unabridged Methods). Ethical approval was obtained from the Oxford Research Ethics Committee (reference number 07/H0604/102).

### ***Demographics and contextual variables***

Trained fieldworkers assessed participants' demographics, self-rated health, long standing illness, alcohol consumption and smoking using Computer Assisted Personal Interviewing. Height and weight were measured by the same fieldworkers using standard protocols that have been described in detail elsewhere<sup>7</sup>. Body mass index (BMI) was computed as weight (kilograms) divided by squared height (metres).

### ***Socioeconomic position measures***

Social class (of the household reference person) was determined using the Registrar General's classification and was grouped as I&II (professional and managerial/technical), III Non-manual, III manual, IV&V (semi-skilled manual and unskilled manual). Equivalised household income was grouped into quintiles. Highest education qualification was coded as

1  
2  
3 no qualification and three levels: Level 1 represents secondary school or below (NVQ1/CSE  
4 and NVQ2/GCE O Level equivalent); Level 2 represents post-compulsory secondary school  
5 (NVQ3/GCE A Level equivalent) and Level 3 represents higher education (higher education  
6 below Degree and NVQ4/NVQ5/Degree or higher). Area deprivation was assessed using the  
7 2004 Index of Multiple Deprivation (IMD), a continuous score that we grouped into quintiles  
8 (1 representing the most deprived quintile, and 5 representing the least deprived).  
9  
10  
11  
12  
13  
14  
15  
16

### 17 *Sedentary time and physical activity measures*

18  
19  
20 A random sub-sample of HSE 2008 participants were selected to wear a uniaxial  
21 accelerometer (Actigraph model GT1M, Pensacola, Florida) during waking hours for seven  
22 consecutive days. Consistent with previous epidemiological SB studies<sup>22</sup>, the sampling  
23 epoch was one minute and non-wear time was defined as periods of at least 60 consecutive  
24 minutes of zero minutely counts, with allowance for up to 2 consecutive minutes of 1–100  
25 counts/minute. For a day to be ‘valid’ for inclusion in the analyses, participants had to have  
26 worn the accelerometer for a minimum of 600 minutes. Participants with at least one day of  
27 valid wear were included in these analyses.<sup>22</sup>  
28  
29  
30  
31  
32  
33  
34  
35  
36  
37

38 SR Sedentary time was assessed using a set of questions on the usual week/weekend day time  
39 spent on: a) TV (including DVDs and videos) viewing; and b) any other sitting during non-  
40 work times, including reading and computer use. For those participants who were  
41 economically active another set of questions assessed the average daily times spent sitting or  
42 standing while at work<sup>17</sup>. While it is not ideal to include standing as a measure of sedentary  
43 time, it is often necessitated by the unavailability of sitting-specific data, and standing is  
44 routinely included in objectively measured sedentary data as accelerometers are unable to  
45 differentiate between time spent sitting or standing. Like previously<sup>17</sup> for the purposes of this  
46 study standing will be considered a measure of sedentary behavior.  
47  
48  
49  
50  
51  
52  
53  
54  
55  
56  
57  
58  
59  
60



1  
2  
3 Physical activity questions included frequency (number of days in the last 4 weeks) and  
4  
5 duration (minutes per day) of participation in walking for any purpose, domestic physical  
6  
7 activity<sup>12,23</sup>, and any recreational sports and exercise including cycling for any purpose<sup>24</sup>.  
8  
9

### 10 ***Data handling/Statistical analysis***

#### 11 *Regrouping the Socioeconomic position variables*

12  
13 Due to small numbers of observations, the top and bottom two categories of social class were  
14  
15 collapsed, resulting in four categories: unskilled /semi-skilled manual; skilled manual; skilled  
16  
17 non-manual; and managerial/technical/ professional. Using existing methods<sup>12</sup>, we derived a  
18  
19 composite Socioeconomic Position (SEP) score using household income, individual  
20  
21 education, and occupational social class of the head of household. The lowest category of  
22  
23 each component variable was assigned a SEP score of 0, with the highest category given a  
24  
25 SEP score of 4. The scores for each individual SEP indicator were then aggregated, resulting  
26  
27 in a SEP score ranging from 0 to 12. Due to small numbers of observations in the high end of  
28  
29 the score, the top SEP score was collapsed into five categories of comparable size.  
30  
31  
32  
33  
34

#### 35 *Deriving sedentary time and physical activity variables*

36  
37  
38 Week- and weekend day-specific TV and non-TV leisure time sitting were converted to all-  
39  
40 week time (minutes) using the following formula:  $(\text{weekday time} \times 5) + (\text{weekend day time} \times$   
41  
42  $2) / 7$ . Occupational sitting/standing time (minutes) per day was calculated by multiplying the  
43  
44 number of days worked per week by the average time spent sitting/standing at work on a  
45  
46 work day, and dividing by 7. Weekly self-reported MVPA hours/week were calculated as  
47  
48 number of days of participation multiplied by time per day in each activity type<sup>7,8</sup> Due to the  
49  
50 large number of participants and the very skewed distribution, self-reported MVPA was  
51  
52 categorised in to none, less than 30 minutes, 30 minutes to 1 hour, 1 to 2 hours, and more  
53  
54 than 2 hours of MVPA per day. For the accelerometry data we used 0-99 counts/minute to  
55  
56  
57  
58  
59  
60

1  
2  
3 denote sedentary ( $<1.5$  MET)<sup>3</sup> and  $\geq 2,020$  counts/minute to denote MVPA ( $>3$  MET)<sup>25</sup>.

4  
5 Accelerometry-measured variables were converted to time (minutes) per valid day.  
6  
7

### 8 9 10 *Missing data and multiple imputation*

11  
12 Outliers outside 3 standard deviations of the mean for all continuous variables apart from age  
13 were removed from the analyses to improve normality. This excluded 1.3% to 2.2% of cases  
14 from each continuous variable. Due to a substantial proportion of cases with at least one  
15 missing value in at least one covariable or exposure variable (22% to 28% depending on the  
16 exposure variable) we performed multiple imputation. IBM SPSS v20 was used to conduct  
17 the multiple imputation, missing values were imputed for all covariables and exposures, with  
18 observed maximum and minimum values used as constraints. Outcome variables did not have  
19 missing values imputed, but were included in the imputation models to predict missing values  
20 in other variables. Linear regression was used as the type of imputation, and 5 cycles of  
21 imputation were conducted resulting in 5 imputed datasets. Results from these 5 datasets  
22 were combined using the multiple imputation module in SPSS to provide pooled results. The  
23 imputed sample size is limited to the number of valid observations for each outcome variable  
24 (2289 for accelerometry-measured ST, 2279 for TV time, 2253 for non-TV sitting time, and  
25 1170 for occupational sitting time). Non-imputed results are presented in the appendix.  
26  
27  
28  
29  
30  
31  
32  
33  
34  
35  
36  
37  
38  
39  
40  
41  
42  
43  
44  
45

### 46 *Statistical analysis*

47  
48 Analyses were weighted for non-response to give a sample that was representative of adults  
49 living in England. The associations between each of the socioeconomic indicators  
50 (household income, social class, education, SEP score, and area deprivation,) and each  
51 individual ST indicator (TV time, non-TV sitting time, occupational sitting/standing, and  
52 accelerometry-measured ST) were examined using generalised linear models, and by multiple  
53  
54  
55  
56  
57  
58  
59  
60

1  
2  
3 linear regression to determine linear trend p values. Results are presented for the whole week,  
4  
5 the weekday/weekend day-specific results can be found in the online appendix. We also  
6  
7 repeated the SEP score analyses stratified by economic activity (employed/self-employed vs  
8  
9 non-economically active). SPSS version 21 was used for all analyses. For all multivariate  
10  
11 analyses we used the complex samples generalised linear models (GLM) procedure to take  
12  
13 into account the complex survey design. Different models were adjusted for: 1) age and sex;  
14  
15 2) additionally for BMI, limiting long standing illness, difficulty with usual activities, car  
16  
17 ownership, drinking frequency, smoking status, and other socioeconomic indicators  
18  
19 (household income, social class, area deprivation); 3) additionally for time spent in self-  
20  
21 reported MVPA or accelerometry-measured MVPA as appropriate, and average  
22  
23 accelerometer wear time on valid days. Models 2 and 3 with accelerometry-measured ST as  
24  
25 the outcome were also adjusted for average accelerometer wear time on each valid day. This  
26  
27 work conforms with the STROBE statement for observational studies.<sup>26</sup>  
28  
29  
30  
31  
32  
33  
34

## 35 **Results**

### 36 37 *Descriptives*

38  
39 2289 adults provided valid accelerometry data, with 2279 and 2253 also providing self-  
40  
41 reported TV and non-TV time respectively. 1170 provided occupational sitting/standing time.  
42  
43 Table 1 presents the sample characteristics of the accelerometry sample by SEP score group  
44  
45 (prior to MI) with casewise deletion of missing values (N=1651). In total 628 participants in  
46  
47 the accelerometry sample had at least one covariate imputed. The variables with the most  
48  
49 imputed values were household income (361 imputed) and BMI (233 imputed). Participants  
50  
51 from lower SEP groups were more likely to be female, older, have a higher BMI, spend less  
52  
53 time sedentary overall and sitting at work, but spend more time watching TV than individuals  
54  
55  
56  
57  
58  
59  
60

1  
2  
3  
4  
5  
6  
7  
8  
9  
10  
11  
12  
13  
14  
15  
16  
17  
18  
19  
20  
21  
22  
23  
24  
25  
26  
27  
28  
29  
30  
31  
32  
33  
34  
35  
36  
37  
38  
39  
40  
41  
42  
43  
44  
45  
46  
47  
48  
49  
50  
51  
52  
53  
54  
55  
56  
57  
58  
59  
60

in higher SEP groups. Lower SEP individuals were also more likely to report a limiting longstanding illness and difficulties with usual daily activities, and be a current cigarette smoker, but less likely to be a heavy drinker and meet physical activity guidelines.

For peer review only

**Table 1:** Sample Characteristics by Socioeconomic Position Score

|                                                                        | SEP Score Group            |               |                             | <i>p</i> |
|------------------------------------------------------------------------|----------------------------|---------------|-----------------------------|----------|
|                                                                        | 1 (lowest) & 2<br>(N=521)* | 3<br>(N=355)* | 4 & 5 (highest)<br>(N=775)* |          |
| <i>Categorical variables<sup>a</sup></i>                               |                            |               |                             |          |
| Sex (% male)                                                           | 40.1                       | 47.0          | 50.5                        | 0.001    |
| Limiting longstanding illness (%)                                      | 32.8                       | 24.5          | 16.8                        | <0.001   |
| Adherence to the physical activity guidelines (self-reported data) (%) | 32.6                       | 43.9          | 49.6                        | <0.001   |
| Difficulty in performing usual activities (%)                          | 21.5                       | 14.9          | 7.8                         | <0.001   |
| Car or van available (%)                                               | 73.9                       | 89.9          | 94.7                        | <0.001   |
| Drinking frequency (% ≥5 times /week)                                  | 15.9                       | 23.1          | 24.9                        | <0.001   |
| Smoking (% current)                                                    | 27.1                       | 23.9          | 15.5                        | <0.001   |
| Employment status (% employed/self-employed)                           | 35.2                       | 64.8          | 76.3                        | <0.001   |
| <i>Continuous variables<sup>b</sup></i>                                |                            |               |                             |          |
| Age (years)                                                            | M (SD)                     | M (SD)        | M (SD)                      | <i>P</i> |
| Age (years)                                                            | 56.1 (18.5)                | 50.4 (16.6)   | 46.9 (15.9)                 | <0.001   |
| BMI (kg/m <sup>2</sup> )                                               | 28.0 (4.9)                 | 27.4 (4.9)    | 26.8 (4.5)                  | <0.001   |
| Sedentary time (accelerometry data) (Minutes/day))                     | 505.6 (97.7)               | 499.4 (90.7)  | 528.7 (87.2)                | <0.001   |
| TV (Minutes/day)                                                       | 218.6 (117.3)              | 175.8 (97.7)  | 145.0 (74.7)                | <0.001   |
| Non-TV sitting time (Minutes/day)                                      | 128.1 (86.4)               | 121.5 (90.6)  | 133.2 (86.3)                | 0.110    |
| Occupational sitting/standing time (Minutes/day)                       | 151.8 (116.5)              | 173.5 (120.9) | 198.1 (121.9)               | <0.001   |
| MVPA time per day (accelerometry data) (Minutes/day)                   | 24.7 (24.1)                | 29.7 (26.3)   | 32.0 (25.1)                 | <0.001   |

\* Occupational sitting time SEP 1 N=152 SEP 2 N=214; SEP 3 N=549 for SEP 4 & 5

<sup>a</sup> Chi Square was used to test significance of association between categorical variables and social class

<sup>b</sup> Anova was used to test significance of association between continuous variables and social class

### *Composite Socioeconomic position and sedentary time*

Figure 1 presents the GLM estimated marginal means and their 95% CIs describing the associations between composite SEP score and each measure of ST. SEP was positively associated with accelerometry-measured ST and occupational sitting/standing time, and inversely associated with TV time in all models. There were no associations between SEP and non-TV sitting time. Adjustments for potential confounders made no material difference to all above associations. Figure 2 presents associations between SEP score and accelerometry-measured ST, stratified by employment status. SEP score was positively associated with accelerometry-measured ST for those in employment only. SEP was inversely associated with TV time regardless of employment status, while non-TV leisure-time sitting was positively associated with SEP (SEP1 coefficient 134, 95% CI 125 to 145; SEP5 coefficient 177, 155 to 198), but only for those not in employment. However this association was not linear (data not shown).

### *Equivalised Household income and sedentary time*

Figure 3 presents associations between household income and each measure of ST. Household income was positively associated with accelerometer-measured ST and occupational sitting time and these associations persisted following adjustments for MVPA and other confounders. Like with SEP score, household income was inversely associated with TV time, although this association was attenuated to the null following adjustments for potential confounders in models 2 and 3. Household income was not associated with non-TV sitting time.

### *Educational attainment and sedentary time*

1  
2  
3 Figure 4 presents the associations between the highest educational qualification and each  
4  
5 measure of ST. Educational attainment was positively associated with accelerometry-  
6  
7 measured ST and inversely associated with TV time in all models. Occupational  
8  
9 sitting/standing time was inversely associated with education but the association did not  
10  
11 appear to be linear (it was evident across the lowest three educational levels only) and was  
12  
13 attenuated to the null following adjustments for potential confounders. There was a weak  
14  
15 positive association between education and non-TV sitting time, following adjustments for  
16  
17 potential confounders in models 2 and 3.  
18  
19

#### 20 21 *Occupational social class and sedentary time*

22  
23  
24 As shown in Figure 5, occupational social class was positively associated with  
25  
26 accelerometry-measured ST and occupational sitting/standing. The initial inverse association  
27  
28 with TV time (model 1) was attenuated to the null following adjustments for potential  
29  
30 confounders. Similarly to SEP score and income, social class was not associated with non-  
31  
32 TV sitting time.  
33  
34

#### 35 36 *Area deprivation and sedentary time*

37  
38  
39 Area-level deprivation was positively associated with TV time (the lower the deprivation the  
40  
41 lower the TV time) but these associations did not persist in the adjusted models (Figure 6).  
42  
43 Area deprivation was not associated with any other measures of ST (Figure 6).  
44  
45

#### 46 47 *Differential associations between imputed and non-imputed data*

48  
49  
50 There were no differences between the imputed and non-imputed models describing the  
51  
52 associations between SEP score and ST indicators, although the 95% confidence intervals  
53  
54 were slightly broader in the unimputed models due to the lower sample size (see  
55  
56 supplementary Figure S2).  
57  
58  
59  
60

### *Differential associations in weekday Vs weekend days*

There was no consistent pattern of differences in the associations of SEP and ST by weekend vs weekday (see supplementary Figures S3 and S4), time of the week-specific results showed broadly the same pattern as the whole week. The only notable difference was that a direct association between SEP and non-TV sitting time was observed on weekend days, but not on weekdays.

### **Discussion**

Literature on the socio-economic gradient of sedentary behavior is very limited and has relied on partial sedentary behavior indicators, mostly TV viewing. To our knowledge, this study is the only one that considers four indicators of socioeconomic position in relation to four indicators of sedentary behavior, allowing a much more in-depth examination of the associations of interest than in previous studies. Our study suggests that occupational ST is what drives the positive association between overall SEP and total ST as there was no association among those not in employment (Figure 2). The difference between the lowest and highest SEP groups (Figure 1) is in the region of 60-70 minutes per day for both total accelerometry-measured sedentary time and occupational sitting/standing time and this is comparable with the difference between the extreme SEP group among the economically active part of the sample (~90 minutes/day). Our findings agree with an Australian study<sup>19</sup> which found that among women, full-time work, skilled occupations, and university education were all associated with high (self-reported) total sitting time. Our study also found that the inverse association between TV time and SEP was significant regardless of employment status. In a study of Dutch workers, sitting time at work varied considerably by type of occupation but not sitting during leisure time<sup>27</sup>.



1  
2  
3 Previous studies of adults in Belgium<sup>13</sup> and Australia<sup>14 15 28</sup> have reported inverse  
4  
5 associations between SEP indicators and TV time. We observed the same TV time pattern  
6  
7 with SEP score and education but not with occupational class, household income or area  
8  
9 deprivation. Although the occupational class and household income data were suggestive of  
10  
11 a weak association with TV time, our current results somehow contradict our study in  
12  
13 Scottish adults,<sup>12</sup> where all SEP indicators (occupational class, household income or area  
14  
15 deprivation) as well as the composite SEP score were associated with recreational screen time  
16  
17 (including TV time). Explanations for this might be that the Scottish study was three times  
18  
19 larger in size (which might have made it easier for data patterns to emerge) and the inclusion  
20  
21 of non-TV screen time as an outcome, although studies from other countries suggest no clear  
22  
23 pattern between non-TV recreational screen time (e.g. computer use) and SEP<sup>29 15</sup>.  
24  
25  
26 Nevertheless, both our English and the Scottish studies demonstrate that when education,  
27  
28 occupational social class and income are combined into a single measure (SEP score) they are  
29  
30 a much more powerful predictor of sedentary time than any single indicator, perhaps because  
31  
32 they collectively capture actual socioeconomic position more thoroughly than any single  
33  
34 indicator. Composite SEP score showed a clear and consistent pattern with all ST outcomes,  
35  
36 although each of the individual/household-level SEP indicators seemed to influence each ST  
37  
38 outcome in various ways, suggesting there are complex, interacting, multi-dimensional  
39  
40 influences of SEP on ST. Accelerometry-measured ST was the only sedentary behavior  
41  
42 variable that showed clear and consistent (positive) associations with all SEP variables  
43  
44 (except from area-level deprivation).  
45  
46  
47  
48

49  
50 Strengths of our study include the availability of both objectively-measured and self-reported  
51  
52 indicators of sedentary behavior which allowed us to be more thorough and detailed when  
53  
54 examining the associations of interest. Accelerometers can capture total sedentary time more  
55  
56 comprehensively than any partial self-reported indicator and as such are able to better  
57  
58  
59  
60

1  
2  
3 quantify the socioeconomic gradient of ST as a contributor to health inequalities, however a  
4  
5 limitation is that accelerometers do not distinguish between sitting and standing which have  
6  
7 different health implications, this also applies to occupational sitting/standing time. It has  
8  
9 been argued that standing should not be considered a sedentary behavior<sup>30</sup>. Another  
10  
11 limitation is that our study was limited to the accelerometry sample of HSE 2008 and this  
12  
13 might have led to our sample being less representative of the target population. Although  
14  
15 those in the subsample offered the accelerometer were older and more likely to be retired and  
16  
17 to be less healthy than the rest of the adult Health Survey for England sample, those who  
18  
19 refused to wear an accelerometer were similar in terms of employment status and area-level  
20  
21 deprivation compared to those who wore the accelerometers for at least four days a week<sup>31</sup>.  
22  
23 Higher SEP is linked to higher commuting by car<sup>32</sup> and this may partly explain the  
24  
25 socioeconomic gradient but our data are limited in that there was no specific question on  
26  
27 commuting-related sitting to examine this explanation.  
28  
29  
30  
31  
32  
33  
34  
35

## 36 **Conclusions**

37  
38 Objectively-measured total sedentary time and occupational sedentary time are higher among  
39  
40 economically active English adults in higher socioeconomic groups compared to less  
41  
42 privileged groups. However, TV viewing is lower in higher socioeconomic groups regardless  
43  
44 of economic activity. Combining different socioeconomic indicators appears to have  
45  
46 composite power as a predictor of sedentary time. Although the cross-sectional design of this  
47  
48 study precludes causal inferences, the pattern of the associations we observed suggests that it  
49  
50 is unlikely that total sedentary behavior contributes to socioeconomic inequalities in health.  
51  
52  
53  
54  
55  
56  
57  
58  
59  
60

1  
2  
3 **Funding:** This work was funded by the National Institute for Health Research through a Career  
4 Development Fellowship (ES). NC is also funded by the National Institute for Health Research  
5 through the same source. The views expressed in this article are those of the authors and not the  
6 English Department of Health or the National Institute for Health Research.  
7  
8  
9

10  
11  
12 **Data Sharing:** No additional data are available  
13

14  
15 **Competing interests:** None of the authors have any competing interests to declare  
16

17  
18 **Authors' Contributions:** All authors have contributed sufficiently, ES conceived the idea, prepared  
19 the dataset, drafted most of the manuscript and revised the manuscript several times. NC did the  
20 statistical analysis under the supervision of ES and prepared the Tables, Figures and Supplemental  
21 Online material. AR processed the accelerometry files. NS, MH and AR redrafted parts of the  
22 manuscript and critically evaluated the whole material. All authors approved the final version before  
23 submission.  
24  
25  
26  
27  
28  
29  
30  
31  
32  
33  
34  
35  
36  
37  
38  
39  
40  
41  
42  
43  
44  
45  
46  
47  
48  
49  
50  
51  
52  
53  
54  
55  
56  
57  
58  
59  
60

## References

1. Pate RR, O'Neill JR, Lobelo F. The evolving definition of "sedentary". *Exercise and Sport Sciences Reviews* 2008;**36**(4):173-78.
2. Katzmarzyk PT, Church TS, Craig CL, et al. Sitting Time and Mortality from All Causes, Cardiovascular Disease, and Cancer. *Med Sci Sports Exerc* 2009;**41**(5):998-1005.
3. Matthews C, George SM, Moore SC, et al. Amount of time spent in sedentary behaviors and cause-specific mortality in US adults. *Am J Clin Nutr* 2012;**95**(2):437-45.
4. Patel AV, Bernstein L, Deka A, et al. Leisure Time Spent Sitting in Relation to Total Mortality in a Prospective Cohort of US Adults. *Am J Epidemiol* 2010;**172**(4):419-29.
5. van der Ploeg HP, Chey T, Korda RJ, et al. Sitting Time and All-Cause Mortality Risk in 222 497 Australian Adults. *Arch Intern Med* 2012;**172**(6):494-500.
6. Grøntved A, Hu FB. Television Viewing and Risk of Type 2 Diabetes, Cardiovascular Disease, and All-Cause Mortality. *JAMA* 2011;**305**(23):2448-55.
7. Joint Health Surveys Unit. The Health Survey for England 2008. Volume 1 Leeds, 2010:21-206.
8. Joint Health Surveys Unit. The Health Survey for England 2008, Volume 2. Leeds: , 2010:11.
9. Marmot MG, Shipley MJ, Hemingway H, et al. Biological and behavioural explanations of social inequalities in coronary heart disease: Whitehall II Study. *Diabetologia* 2008;**51**(11):1980-88.
10. Williams ED, Tapp RJ, Magliano DJ, et al. Health behaviours, socioeconomic status and diabetes incidence: the Australian Diabetes Obesity and Lifestyle Study (AusDiab). *Diabetologia* 2010;**53**:2538-45.
11. Stringhini S, Sabia S, Shipley M, et al. Association of Socioeconomic Position With Health Behaviors and Mortality. *JAMA* 2010;**303**(12):1159-66.
12. Stamatakis E, Hillsdon M, Mishra G, et al. Television viewing and other screen-based entertainment in relation to multiple socioeconomic status indicators and area deprivation: the Scottish Health Survey 2003. *Journal of epidemiology and community health* 2009;**63**(9):734-40.
13. Van Dyck D, Cardon G, Deforche B, et al. Socio-demographic, psychosocial and home-environmental attributes associated with adults' domestic screen time. *BMC Public Health* 2011;**11**:668.
14. Teychenne M, Ball K, Salmon J. Correlates of socio-economic inequalities in women's television viewing: a study of intrapersonal, social and environmental mediators. *Int J Behav Nutr Phy Act* 2012;**9**:3.
15. Burton NW, Haynes M, van Uffelen JGZ, et al. Mid-Aged Adults' Sitting Time in Three Contexts. *Am J Prev Med* 2012;**42**(4):363-73.
16. Bowman SA. Television-viewing characteristics of adults: correlations to eating practices and overweight and health status. *Preventing Chronic Disease* 2006;**3**(2).
17. Stamatakis E, Hamer M, Tilling K, et al. Sedentary time in relation to cardio-metabolic risk factors: differential associations for self-report vs accelerometry in working age adults. *Int J Epidemiol* 2012;**41**:1328-37.
18. Clark BK, Healy GN, Winkler EAH, et al. Relationship of Television Time with Accelerometer-Derived Sedentary Time: NHANES *Med Sci Sports Exerc* 2011;**43**(5):822-28.
19. van Uffelen JGZ, Heesch KC, Brown W. Correlates of Sitting Time in Working Age Australian Women: Who Should Be Targeted With Interventions to Decrease Sitting Time? *J Phys Act Health* 2012;**9**(2):270-87.
20. Santos R, Soares-Miranda L, Vale S, et al. Sitting time and body mass index, in a portuguese sample of men: Results from the azorean physical activity and health study (APAHS). *Int J Environ Res Publ Health* 2010;**7**(4):1500-07.
21. Duncan MJ, HBadland HM, Mummery WK. Physical Activity Levels by Occupational Category in Non-Metropolitan Australian Adults. *J Phys Act Health* 2010;**7**(6):718-23.

- 1  
2  
3 22. Matthews CE, Chen KY, Freedson PS, et al. Amount of time spent in sedentary behaviors in the  
4 united states, 2003-2004. *Am J Epidemiol* 2008;**167**(7):875-81.
- 5 23. Stamatakis E, Ekelund U, Wareham N. Temporal trends in physical activity in England. The Health  
6 Survey for England 1991 to 2004. . *Prev Med* 2007;**45**:416-23.
- 7 24. Stamatakis E, Chaudhury M. Temporal trends in adults' sports participation patterns in England  
8 between 1997 and 2006: the Health Survey Br J Sports Med 2008;**42**:601-08.
- 9 25. Troiano RP, Berrigan D, Dodd KW, et al. Physical activity in the United States measured by  
10 accelerometer. *Med Sci Sports Exerc* 2008;**40**(1):181-8.
- 11 26. Gallo V, Egger M, McCormack V, et al. STrengthening the Reporting of OBServational studies in  
12 Epidemiology--Molecular Epidemiology (STROBE-ME): an extension of the STROBE  
13 Statement. *PLoS medicine* 2011;**8**(10):e1001117.
- 14 27. Jans M, Proper K, Hildebrandt V. Sedentary Behavior in Dutch Workers: Differences between  
15 Occupations and Business Sectors. *Am J Prev Med* 2007;**33**:450-54.
- 16 28. Stamatakis E, Grunseit AC, Coombs N, et al. Associations between socio-economic position and  
17 sedentary behaviour in a large population sample of Australian middle and older-aged  
18 adults: The Social, Economic, and Environmental Factor (SEEF) Study. *Prev Med* 2014;**63c**:72-  
19 80.
- 20 29. Rhodes RE, Mark RS, Temmel CP. Adult Sedentary Behavior A Systematic Review. *Am J Prev Med*  
21 2012;**42**(3):E3-E28.
- 22 30. Yates T, Wilmot EG, Khunti K, et al. Stand up for your health: Is it time to rethink the physical  
23 activity paradigm? *Diabetes Research and Clinical Practice* 2011;**93**(2):292-94.
- 24 31. Roth M, Mindell J. Who provides accelerometry data? Correlates of adherence to wearing an  
25 accelerometry motion sensor: the 2008 health survey for England. *J Phys Act Health*  
26 2013;**10**(1):70-78.
- 27 32. Goodman A, Guell C, Panter J, et al. Healthy travel and the socio-economic structure of car  
28 commuting in Cambridge, UK: A mixed-methods analysis. *Social Science & Medicine*  
29 2012;**74**(12):1929-38.
- 30  
31  
32  
33  
34  
35  
36  
37  
38  
39  
40  
41  
42  
43  
44  
45  
46  
47  
48  
49  
50  
51  
52  
53  
54  
55  
56  
57  
58  
59  
60

## Figure Legends and footnotes

### Figure 1: Multivariate-adjusted average daily sedentary time by SEP score

Model 1: adjusted for age and sex; model 2: further adjustments for area deprivation, BM, limiting long standing illness, difficulty with usual activities, car ownership, drinking frequency, and smoking status; model 3: further adjustments for self-reported time spent in MVPA, accelerometry-measured MVPA time, and average accelerometer wear time on valid days. Models with accelerometer sedentary time as the outcome were also adjusted for average accelerometer wear time on valid days.

a Coefficients represent estimated marginal means from generalised linear models, with 95% confidence intervals. Linear trend p values were obtained from linear regression.

b SEP1 indicates most deprived, SEP 5 indicates least deprived

c Any paid work in the last four weeks.

### Figure 2: Multivariate-adjusted accelerometer-measured sedentary time by SEP Score for individuals stratified by employment status.

Model 1: adjusted for age and sex; model 2: further adjustments for area deprivation, BM, limiting long standing illness, difficulty with usual activities, car ownership, drinking frequency, and smoking status; model 3: further adjustments for self-reported time spent in MVPA, accelerometry-measured MVPA time, and average accelerometer wear time on valid days. Models with accelerometer sedentary time as the outcome were also adjusted for average accelerometer wear time on valid days.

a Coefficients represent estimated marginal means from generalised linear models, with 95% confidence intervals. Linear trend p values were obtained from linear regression.

b SEP1 indicates most deprived, SEP 5 indicates least deprived

c Any paid work in the last four weeks.

### Figure 3: Multivariate-adjusted average daily sedentary time by household income quartile

Model 1: adjusted for age and sex; model 2: further adjustments for area deprivation, BM, limiting long standing illness, difficulty with usual activities, car ownership, drinking frequency, and smoking status; model 3: further adjustments for self-reported time spent in MVPA, accelerometry-measured MVPA time, and average accelerometer wear time on valid days. Models with accelerometer sedentary time as the outcome were also adjusted for average accelerometer wear time on valid days.

a Coefficients represent estimated marginal means from generalised linear models, with 95% confidence intervals. Linear trend p values were obtained from linear regression.

b Q1 indicates lowest income quartile ( $\leq$ £13876), Q4 indicates the highest income quartile ( $\geq$ £39001).

### Figure 4: Multivariate-adjusted difference average daily sedentary time by highest qualification

Model 1: adjusted for age and sex; model 2: further adjustments for area deprivation, BM, limiting long standing illness, difficulty with usual activities, car ownership, drinking frequency, and smoking status; model 3: further adjustments for self-reported time spent in MVPA, accelerometry-measured MVPA time, and average

1  
2  
3 accelerometer wear time on valid days. Models with accelerometer sedentary time as the outcome were also  
4 adjusted for average accelerometer wear time on valid days.

5 a Coefficients represent estimated marginal means from generalised linear models, with 95% confidence  
6 intervals. Linear trend p values were obtained from linear regression.

7 b Education Level 1 represents NVQ1/CSE and NVQ2 GCE O Level equivalent; Level 2 represents

8 NVQ3/GCE A Level equivalent; Level 3 represents higher education below Degree and NVQ4/NVQ5/Degree  
9 or higher.  
10

11  
12  
13 **Figure 5:** Multivariate-adjusted average daily sedentary time<sup>a</sup> by occupational social class.

14  
15  
16 Model 1: adjusted for age and sex; model 2: further adjustments for area deprivation, BM, limiting long  
17 standing illness, difficulty with usual activities, car ownership, drinking frequency, and smoking status; model  
18 3: further adjustments for self-reported time spent in MVPA, accelerometry-measured MVPA time, and average  
19 accelerometer wear time on valid days. Models with accelerometer sedentary time as the outcome were also  
20 adjusted for average accelerometer wear time on valid days.

21 a Coefficients represent estimated marginal means from generalised linear models, with 95% confidence  
22 intervals. Linear trend p values were obtained from linear regression.  
23  
24

25 **Figure 6:** Multivariate-adjusted sedentary time by area deprivation quintile.

26  
27  
28 Model 1: adjusted for age and sex; model 2: further adjustments for area deprivation, BM, limiting long  
29 standing illness, difficulty with usual activities, car ownership, drinking frequency, and smoking status; model  
30 3: further adjustments for self-reported time spent in MVPA, accelerometry-measured MVPA time, and average  
31 accelerometer wear time on valid days. Models with accelerometer sedentary time as the outcome were also  
32 adjusted for average accelerometer wear time on valid days.

33 a Coefficients represent estimated marginal means from generalised linear models, with 95% confidence  
34 intervals. Linear trend p values were obtained from linear regression.

35 b Q1 indicates most deprived, Q5 indicates least deprived  
36  
37  
38  
39  
40  
41  
42  
43  
44  
45  
46  
47  
48  
49  
50  
51  
52  
53  
54  
55  
56  
57  
58  
59  
60

1  
2  
3  
4  
5  
6  
7  
8  
9  
10  
11  
12  
13  
14  
15  
16  
17  
18  
19  
20  
21  
22  
23  
24  
25  
26  
27  
28  
29  
30  
31  
32  
33  
34  
35  
36  
37  
38  
39  
40  
41  
42  
43  
44  
45  
46  
47  
48  
49  
50  
51  
52  
53  
54  
55  
56  
57  
58  
59  
60

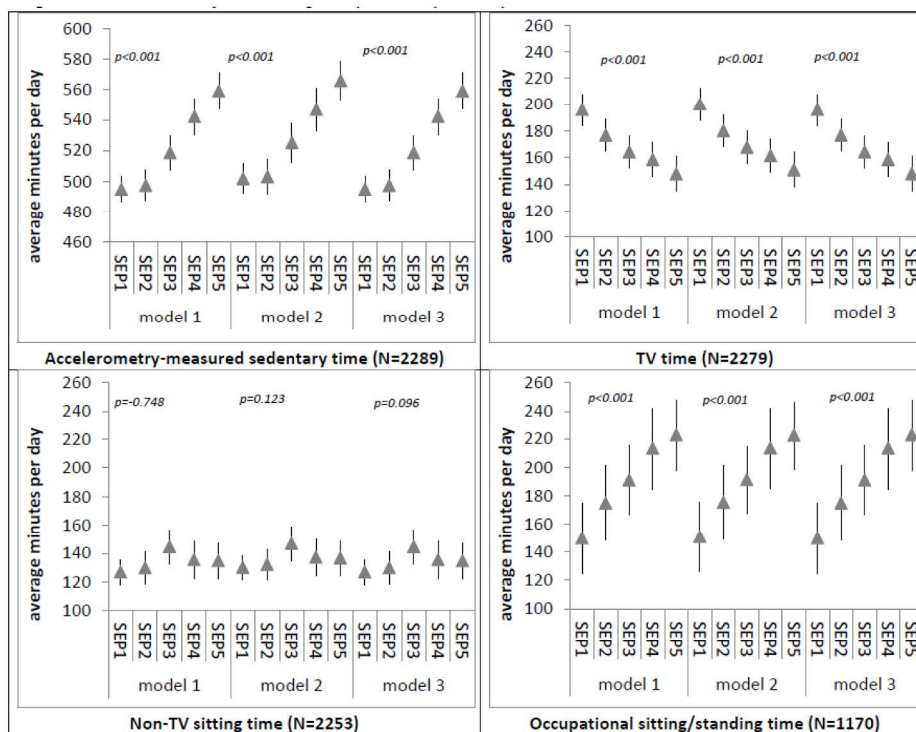

Figure 1: Multivariate-adjusted average daily sedentary time by SEP score  
254x190mm (300 x 300 DPI)

Review only



1  
2  
3  
4  
5  
6  
7  
8  
9  
10  
11  
12  
13  
14  
15  
16  
17  
18  
19  
20  
21  
22  
23  
24  
25  
26  
27  
28  
29  
30  
31  
32  
33  
34  
35  
36  
37  
38  
39  
40  
41  
42  
43  
44  
45  
46  
47  
48  
49  
50  
51  
52  
53  
54  
55  
56  
57  
58  
59  
60

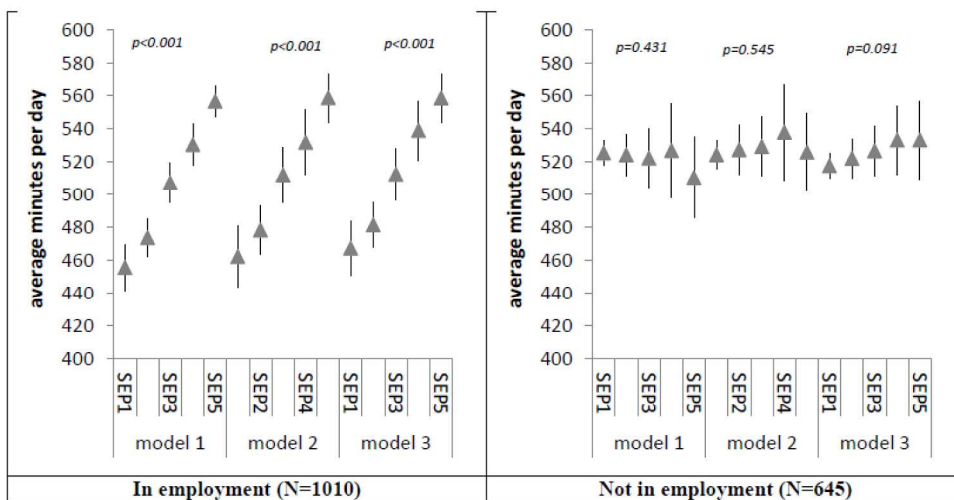

Figure 2: Multivariate-adjusted accelerometer-measured sedentary time by SEP Score for individuals stratified by employment status  
254x190mm (300 x 300 DPI)

ew only

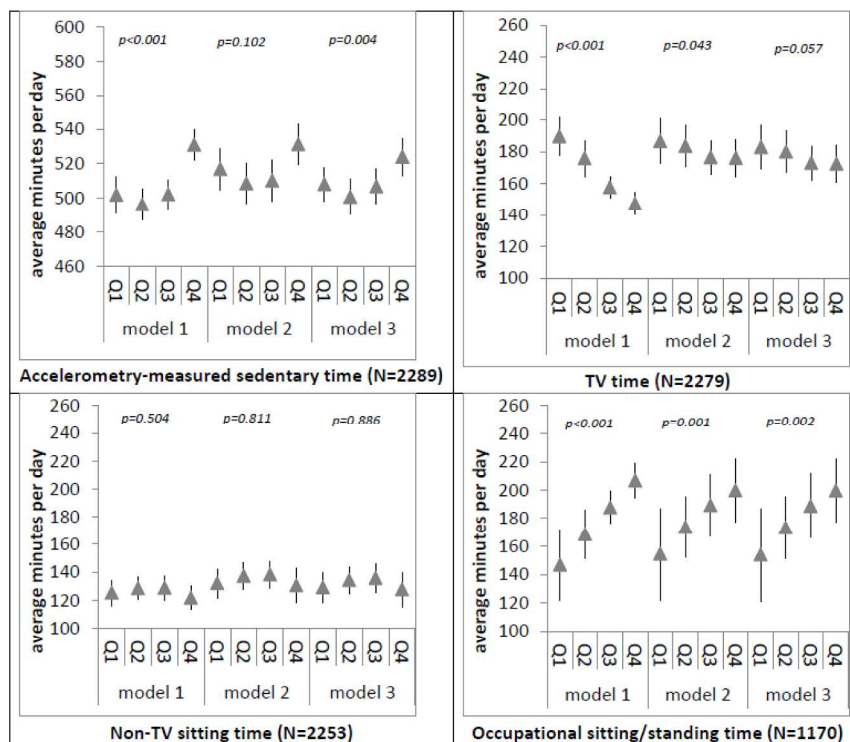

Figure 3: Multivariate-adjusted average daily sedentary time by household income quartile  
254x190mm (300 x 300 DPI)

Review only

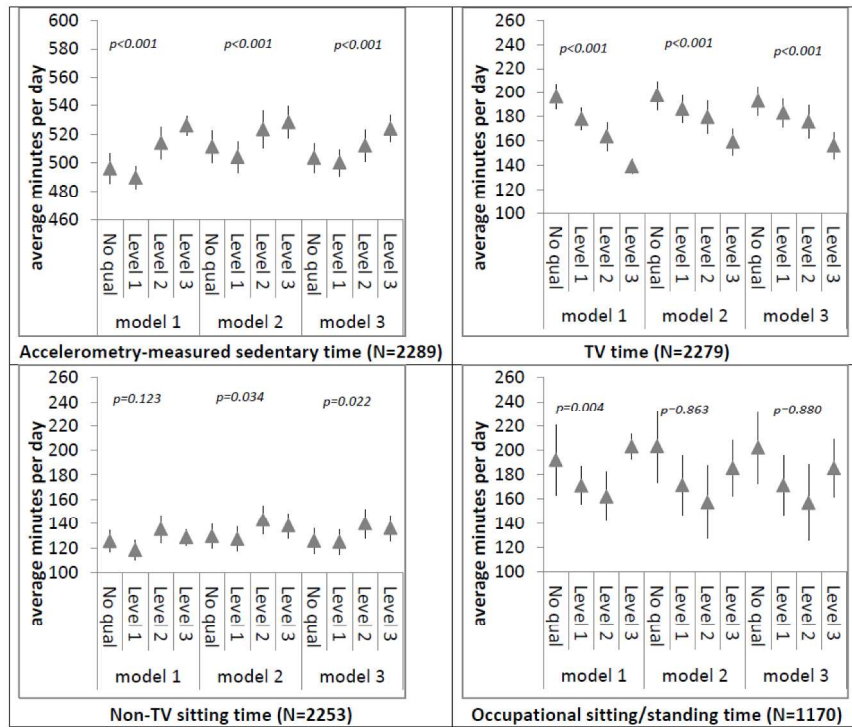

Figure 4: Multivariate-adjusted difference average daily sedentary time by highest qualification  
254x190mm (300 x 300 DPI)

View only

1  
2  
3  
4  
5  
6  
7  
8  
9  
10  
11  
12  
13  
14  
15  
16  
17  
18  
19  
20  
21  
22  
23  
24  
25  
26  
27  
28  
29  
30  
31  
32  
33  
34  
35  
36  
37  
38  
39  
40  
41  
42  
43  
44  
45  
46  
47  
48  
49  
50  
51  
52  
53  
54  
55  
56  
57  
58  
59  
60

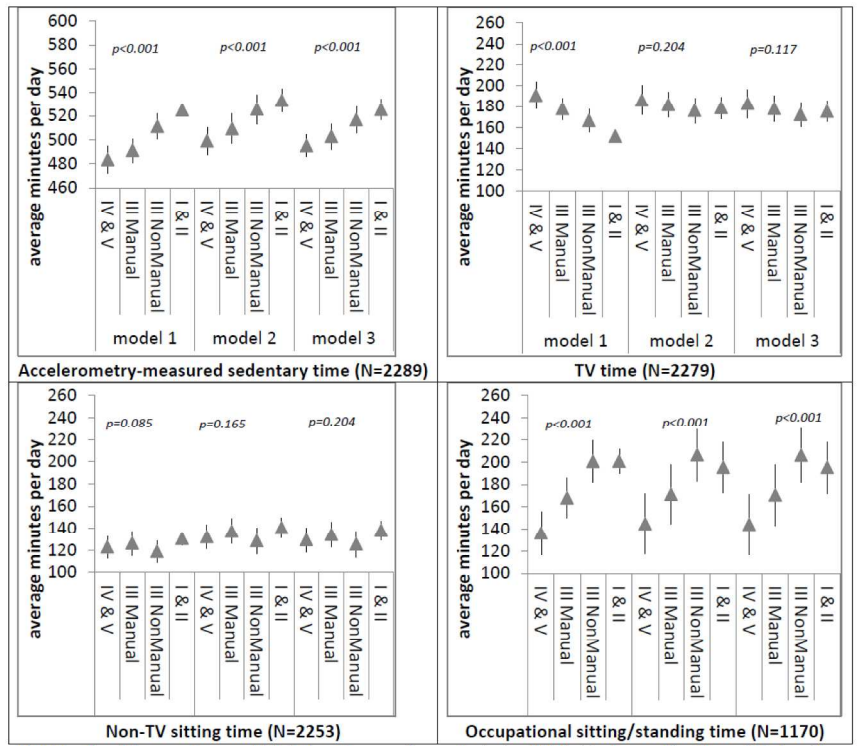

Figure 5: Multivariate-adjusted average daily sedentary timea by occupational social class  
254x190mm (300 x 300 DPI)

Review only

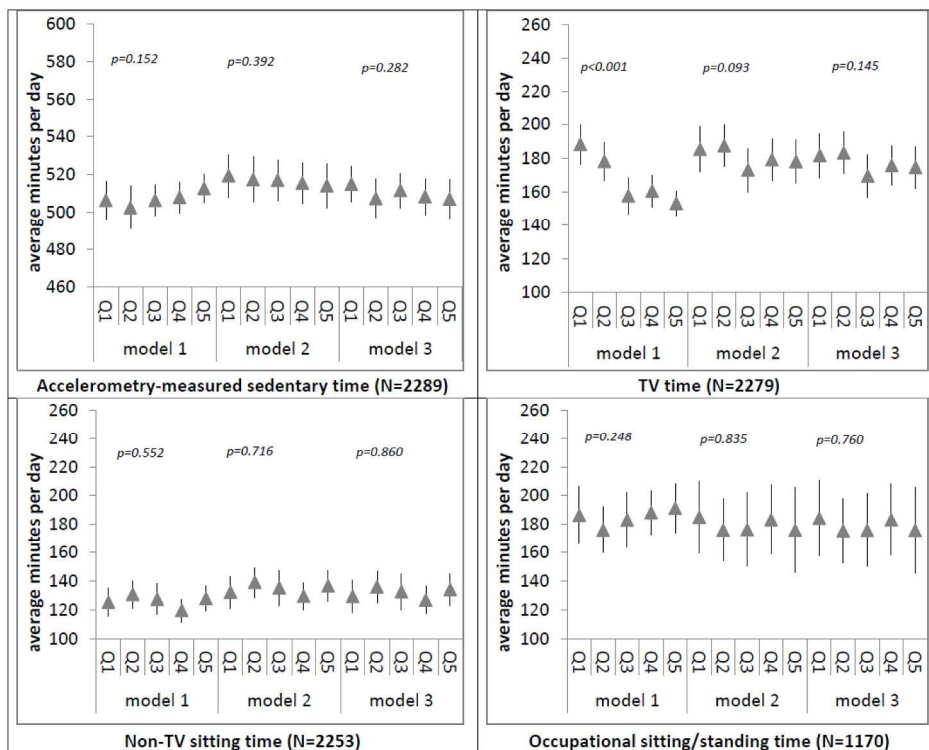

Figure 6: Multivariate-adjusted sedentary time by area deprivation quintiles  
254x190mm (300 x 300 DPI)

Review only

## Supplemental Digital Content 1

### Unabridged Methods

#### *Study Sample*

The Health Survey for England (HSE) is a repeated nationally representative study of individuals living in private households in England. We drew our sample from the 2008 HSE which had a special focus on physical activity and sedentary behaviour. The sample is drawn using multi-stage stratified probability sampling with postcode sectors as the primary sampling unit. More details of the sample design are available elsewhere (2). The household response rate was 64% for the main sample, and 73% for the accelerometer sub-sample (3). Ethical approval for the 2008 HSE was obtained from the Oxford A Research Ethics Committee (reference number 07/H0604/102). We included adults aged 16 and over who had both valid accelerometry and self-reported SB data. Participants provided written informed consent.

#### *Demographics and contextual variables*

Trained fieldworkers assessed participants' demographics, self-rated health, long standing illness, alcohol consumption and smoking using Computer Assisted Personal Interviewing. Height and weight were measured by the same fieldworkers using standard protocols that have been described in detail elsewhere (5). Body mass index (BMI) was computed as weight (kilograms) divided by squared height (metres).

#### *Socioeconomic position measures*

Social class was determined using the Registrar General's classification and was grouped as I&II (professional and managerial/technical), III Non-manual, III manual, IV&V (semi-skilled manual and unskilled manual). Household income was converted to equivalised annual household income that is adjusted for the number of persons in the household using the McClements scoring system (15). The

1  
2  
3 income data presented here are based on quartiles. Highest education qualification was coded as no  
4 qualification and three levels: Level 1 represents secondary school or below (NVQ1/CSE and  
5 NVQ2/GCE O Level equivalent); Level 2 represents post-compulsory secondary school (NVQ3/GCE  
6 A Level equivalent) and Level 3 represents higher education (higher education below Degree and  
7 NVQ4/NVQ5/Degree or higher). Area deprivation was assessed using the 2004 Index of Multiple  
8 Deprivation (IMD) which provides a measure of area deprivation with deprivation based on measures  
9 in seven domains: income, employment, health deprivation and disability, education, skills and  
10 training, barriers to housing and services, crime and living environment. IMD was initially a  
11 continuous score that we grouped into quintiles (1 representing the most deprived quintile, and 5  
12 representing the least deprived).

### 23 *Sedentary time and physical activity measures*

#### 24 *Objective measures*

25  
26  
27 A random sub-sample of HSE 2008 participants were selected to wear a uniaxial accelerometer  
28 (Actigraph model GT1M, Pensacola, Florida) during waking hours for seven consecutive days. At the  
29 core addresses that were eligible for accelerometry, up to two adults in total were selected to wear the  
30 accelerometer (up to one adult in those households with eligible children). Full details of the  
31 accelerometry sample selection procedure can be found elsewhere (6). At the end of the initial HSE  
32 2008 interview, interviewers obtained agreement for participation in the accelerometry study,  
33 provided the accelerometers and explained procedures. The accelerometry data were processed using  
34 specialist software (KineSoft, New Brunswick). In consistency with previous epidemiological SB  
35 studies (8), the sampling epoch was one minute and non-wear time was defined as periods of at least  
36 60 consecutive minutes of zero counts, with allowance for up to 2 consecutive minutes of 1–99  
37 counts/minute. For a day to be ‘valid’ for inclusion in the analyses, participants had to have worn the  
38 accelerometer for a minimum of 600 minutes. Like previously (7), participants with at least one day  
39 of valid wear were included in these analyses, although the majority (76%, N=1742) had between six  
40  
41  
42  
43  
44  
45  
46  
47  
48  
49  
50  
51  
52  
53  
54  
55  
56  
57  
58  
59  
60

1  
2  
3 and seven days and 95% (N=2165) had at least three valid days. All physical activity and sedentary  
4  
5 time variables were converted to time (in minutes) per valid day.  
6  
7  
8  
9

### 10 *Self-reported measures*

11  
12 Sedentary time was assessed using a set of questions on the usual weekday time spent on: a) TV  
13 (including DVDs and videos) viewing (“In the last four weeks, how much time did you spend  
14 watching TV/videos) on an average week day?”); and b) any other sitting during non-work times,  
15 including reading and computer use (“In the last 4 weeks, how much time did you spend sitting down  
16 doing any other activity on an average weekday? Please do not include time spent doing these  
17 activities while at work”). An equivalent set of questions assessed TV and non-TV sedentary time in  
18 the weekend days. For those participants who were economically active (i.e. those who answered  
19 “yes” to the question “In the last 4 weeks, did you do any paid or unpaid work either as an employee  
20 or as self-employed (including voluntary or part time work)?”) another set of questions assessed the  
21 average daily times spent sitting/standing while at work (“On an average work day in the last four  
22 weeks, how much time did you usually spend sitting down or standing up?”). (14) While it is not  
23 ideal to include standing as a measure of sedentary time, it is often necessitated by the unavailability  
24 of sitting-specific data, and standing is routinely included in objectively measured sedentary data as  
25 most accelerometers are unable to differentiate between time spent sitting or standing. For the  
26 purposes of this study, standing will be considered a measure of sedentary behaviour.  
27  
28  
29  
30  
31  
32  
33  
34  
35  
36  
37  
38  
39  
40  
41  
42  
43  
44

45 Physical activity was assessed using the long version of the Health Survey for England questionnaire  
46 that was used in the 1997 Survey for the first time and was repeated in the 1998, 2006, and 2008  
47 Surveys. Questions included frequency (number of days in the last 4 weeks) and duration (minutes  
48 per day) of participation in walking for any purpose, domestic physical activity (12) (11) and any  
49 recreational exercise, (e.g. cycling, swimming, aerobics, gym exercises, dancing, team sports, racket  
50 sports) (9). Occupational activity was measured as average daily (per day at work) times spent on  
51 walking, climbing stairs or ladders, and lifting, carrying or moving loads (5). We calculated MVPA  
52  
53  
54  
55  
56  
57  
58  
59  
60



1  
2  
3 using established metabolic equivalent tables (1). The criterion validity of the physical activity  
4 questionnaire has been demonstrated in a study of 106 English adults from the general population (45  
5 men) where the output of accelerometers (worn for two non-consecutive weeks over a month period)  
6 was compared against the above questions (4, 13).  
7  
8  
9  
10

### 11 12 13 14 ***Data handling/Statistical analysis***

#### 15 16 17 *Regrouping the Socioeconomic position variables*

18  
19 Due to small numbers of observations, the top and bottom two categories of social class were  
20 collapsed, resulting in four categories: unskilled /semi-skilled manual; skilled manual; skilled non-  
21 manual; and managerial/technical/ professional. Using existing methods (10), we derived a composite  
22 Socioeconomic Position (SEP) score using household income, individual education, and occupational  
23 social class of the head of household. The lowest category of each component variable was assigned a  
24 SEP score of 0, the second lowest category was given a SEP score of 1, and so on, with the highest  
25 category given a SEP score of 4. The scores for each individual SEP indicator were then aggregated,  
26 resulting in a SEP score ranging from 0 to 12. Due to small numbers of observations in the high and  
27 low end of the score, the SEP score was collapsed into five categories of comparable size (0-3=SEP1;  
28 4-5=SEP2; 6-7=SEP3; 8=SEP4; 9-12=SEP5), with 1 representing the lowest SEP, and 5 the highest.  
29  
30  
31  
32  
33  
34  
35  
36  
37  
38  
39  
40  
41  
42  
43  
44

#### 45 46 47 *Deriving sedentary time and physical activity variables*

48  
49 Week- and weekend day-specific TV and non-TV leisure time sitting were converted to all-week time  
50 (minutes) using the following formula:  $(\text{weekday time} \times 5) + (\text{weekend day time} \times 2) / 7$ .

51 Occupational sitting/standing time (minutes) per day was calculated by multiplying the number of  
52 days worked per week by the average time spent sitting/standing at work on a work day, and dividing  
53 by 7.  
54  
55  
56  
57  
58  
59  
60

1  
2  
3 Weekly self-reported MVPA hours/week were calculated as number of days of participation  
4 multiplied by time per day in each activity type (walking, cycling, and each other sport and exercise  
5 the questionnaire enquired about) (5, 6) Due to the large number of participants and the very skewed  
6 distribution, self-reported MVPA was categorised in to none, less than 30 minutes, 30 minutes to 1  
7 hour, 1 to 2 hours, and more than 2 hours of MVPA per day.  
8  
9  
10  
11  
12

13  
14  
15  
16 For the accelerometry data we used 0-99 counts/minute to denote sedentary (<1.5 MET) (7); 200-  
17 2,019 counts/minute to denote light physical activity; and  $\geq 2,020$  counts/minute to denote MVPA (>3  
18 MET) (16). Accelerometer-measured sedentary time and physical activity variables were converted to  
19 time (in minutes) per valid day.  
20  
21  
22  
23  
24  
25  
26

### 27 *Missing data and multiple imputation*

28  
29 To improve the normality of the residuals that are required for linear regression, outliers outside 3  
30 standard deviations of the mean for all continuous variables apart from age were removed from the  
31 analyses. This excluded 1.3% to 2.2% of cases from each continuous variable. Due to a substantial  
32 proportion of cases with at least one missing value in at least one covariable or exposure variable  
33 (22% to 28% depending on the exposure variable) we performed multiple imputation. IBM SPSS v20  
34 was used to conduct the multiple imputation, missing values were imputed for all covariables and  
35 exposures, with observed maximum and minimum values used as constraints. Outcome variables did  
36 not have missing values imputed, but were included in the imputation models to predict missing  
37 values in other variables. Linear regression was used as the type of imputation, and 5 cycles of  
38 imputation were conducted resulting in 5 imputed datasets. Results from these 5 datasets were  
39 combined using the multiple imputation module in SPSS to provide pooled results. The imputed  
40 sample size is limited to the number of valid observations for each outcome variable (2279 for  
41 accelerometry-measured ST, 2269 for TV time, 2253 for non-TV sitting time, and 1170 for  
42 occupational sitting time). Non-imputed results are presented in the appendix.  
43  
44  
45  
46  
47  
48  
49  
50  
51  
52  
53  
54  
55  
56  
57  
58  
59  
60

### *Dealing with non-response*

Analyses were weighted for non-response (5) to give a sample that was representative of adults living in England. In brief, the non-response weights were calculated by fitting a logistic regression model (weighted by a previously developed weighting factor)(5) for all adults with interview completion as the outcome and age group by sex, household type, geographical area, and household social class as covariates. The non-response weights, which were trimmed at the 1% tails to remove extreme values, were calculated as the inverse of the predicted probabilities of response.(5) The complex samples module in SPSS was used to account for clusters in the survey design.

### *Statistical analysis*

The associations between each of the socioeconomic indicators (household income, social class, education, SEP score, and area deprivation,) and each individual ST indicator (TV time, non-TV sitting time, occupational sitting/standing, and accelerometer-measured ST) was examined using generalised linear models, and by multiple linear regression to determine linear trend p values. Results are presented for the whole week, the weekday/weekend day-specific results can be found in the online appendix. SPSS version 21 was used for all analyses. For all multivariate analyses we used the complex samples generalised linear models (GLM) procedure to take into account the complex survey design.

All statistical models were run for each combination of dependent variable and main exposure.

Different models were adjusted for: 1) age and sex; 2) additionally for BMI, limiting long standing illness, difficulty with usual activities, car ownership, drinking frequency, smoking status, and other socioeconomic indicators (household income, social class, area deprivation); 3) additionally for time spent in self-reported MVPA and accelerometer-measured MVPA, and average accelerometer wear

1  
2  
3 time on valid days Models with accelerometer-measured ST as the outcome were also adjusted for  
4  
5 average accelerometer wear time on each valid day. There was no evidence of colinearity in the  
6  
7 multivariate model as no variance inflation factor value was higher than approximately 1.5, with most  
8  
9 values just over 1. Residual statistics and plots for each model were checked for normality,  
10  
11 independence of observations, homoscedasticity, and influential outliers.  
12  
13

14  
15 GLM coefficients indicate mean differences in sedentary time (in minutes) between the reference  
16  
17 category and each of the other SEP categories. The lowest SEP category (<£10671 for household  
18  
19 income, unskilled/ semi-skilled manual for social class, most deprived quintile for area deprivation,  
20  
21 SEP1 (lowest socioeconomic position) for SEP score) is the reference category for the mean  
22  
23 difference in the outcome (and associated confidence interval for the difference) in all CSGLMs.  
24  
25  
26  
27

## 28 References

- 29 1. Ainsworth BE, Haskell WL, Whitt MC et al. Compendium of physical activities: an update of  
30 activity codes and MET intensities. *Med Sci Sports Exerc.* 2000;32(9 Suppl):S498-504.
- 31 2. Joint Health Surveys Unit. *The Health Survey for England 2008. Volume 1* Leeds2010.
- 32 3. Joint Health Surveys Unit. *The Health Survey for England 2008. Volume 2* Leeds2010.
- 33 4. Joint Health Surveys Unit. *The Health Survey for England Physical Activity Validation Study:*  
34 *substantive report.* Leeds: Health and Social Care Information Centre; 2007.
- 35 5. Joint Health Surveys Unit. *The Health Survey for England 2008.* Leeds: The Information  
36 Centre for Health and Social Care; 2009.
- 37 6. Joint Health Surveys Unit. *The Health Survey for England 2008, Volume 2: Methods and*  
38 *Documentation.* Leeds: The Information Centre for Health and Social Care; 2009.
- 39 7. Matthews C, George SM, Moore SC et al. Amount of time spent in sedentary behaviors and  
40 cause-specific mortality in US adults. *The American Journal of Clinical Nutrition.*  
41 2012;95(2):437-45.
- 42 8. Matthews CE, Chen KY, Freedson PS et al. Amount of time spent in sedentary behaviors in  
43 the united states, 2003-2004. *Am J Epidemiol.* 2008;167(7):875-81.
- 44 9. Stamatakis E, Chaudhury M. Temporal trends in adults' sports participation patterns in  
45 England between 1997 and 2006: the Health Survey *Br J Sports Med.* 2008;42:601-8.
- 46 10. Stamatakis E, Hillsdon M, Mishra G, Hamer M, Marmot M. Television viewing and other  
47 screen-based entertainment in relation to multiple socioeconomic status indicators and area  
48 deprivation: the Scottish Health Survey 2003. *J Epidemiol Commun Health.* 2009;63:734-40.
- 49 11. Stamatakis E, Ekelund U, Wareham N. Temporal trends in physical activity in England. The  
50 Health Survey for England 1991 to 2004. . *Prev Med.* 2007;45:416-23.
- 51 12. Stamatakis E, Hamer M, Lawlor DA. Physical activity, mortality and cardiovascular disease: Is  
52 domestic physical activity beneficial? The Scottish Health Survey 1995, 1998 and 2003. . *Am J*  
53 *Epidemiol.* 2009;169:1191-200.  
54  
55  
56  
57  
58  
59  
60

- 1  
2  
3  
4  
5  
6  
7  
8  
9  
10  
11  
12  
13  
14  
15  
16  
17  
18  
19  
20  
21  
22  
23  
24  
25  
26  
27  
28  
29  
30  
31  
32  
33  
34  
35  
36  
37  
38  
39  
40  
41  
42  
43  
44  
45  
46  
47  
48  
49  
50  
51  
52  
53  
54  
55  
56  
57  
58  
59  
60
13. Stamatakis E, Hamer M, Primatesta P. Cardiovascular medication, physical activity and mortality: cross-sectional population study with ongoing mortality follow-up. *Heart*. 2009;95(6):448-53.
  14. Stamatakis E, Hamer M, Tilling K, Lawlor DA. Sedentary time in relation to cardio-metabolic risk factors: differential associations for self-report vs accelerometry in working age adults. *Int J Epidemiol*. 2012.
  15. Stamatakis E, Hillsdon M, Mishra G, Hamer M, Marmot M. Television viewing and other screen-based entertainment in relation to multiple socioeconomic status indicators and area deprivation: the Scottish Health Survey 2003. *Journal of Epidemiology and Community Health*. 2009;63(9):734-40.
  16. Troiano RP, Berrigan D, Dodd KW, Masse LC, Tilert T, McDowell M. Physical activity in the United States measured by accelerometer. *Med Sci Sports Exerc*. 2008;40(1):181-8.

Supplementary Figure S2: Multivariate-adjusted average daily sedentary time<sup>a</sup> by SEP score<sup>b</sup>. Unimputed, casewise-deleted data.

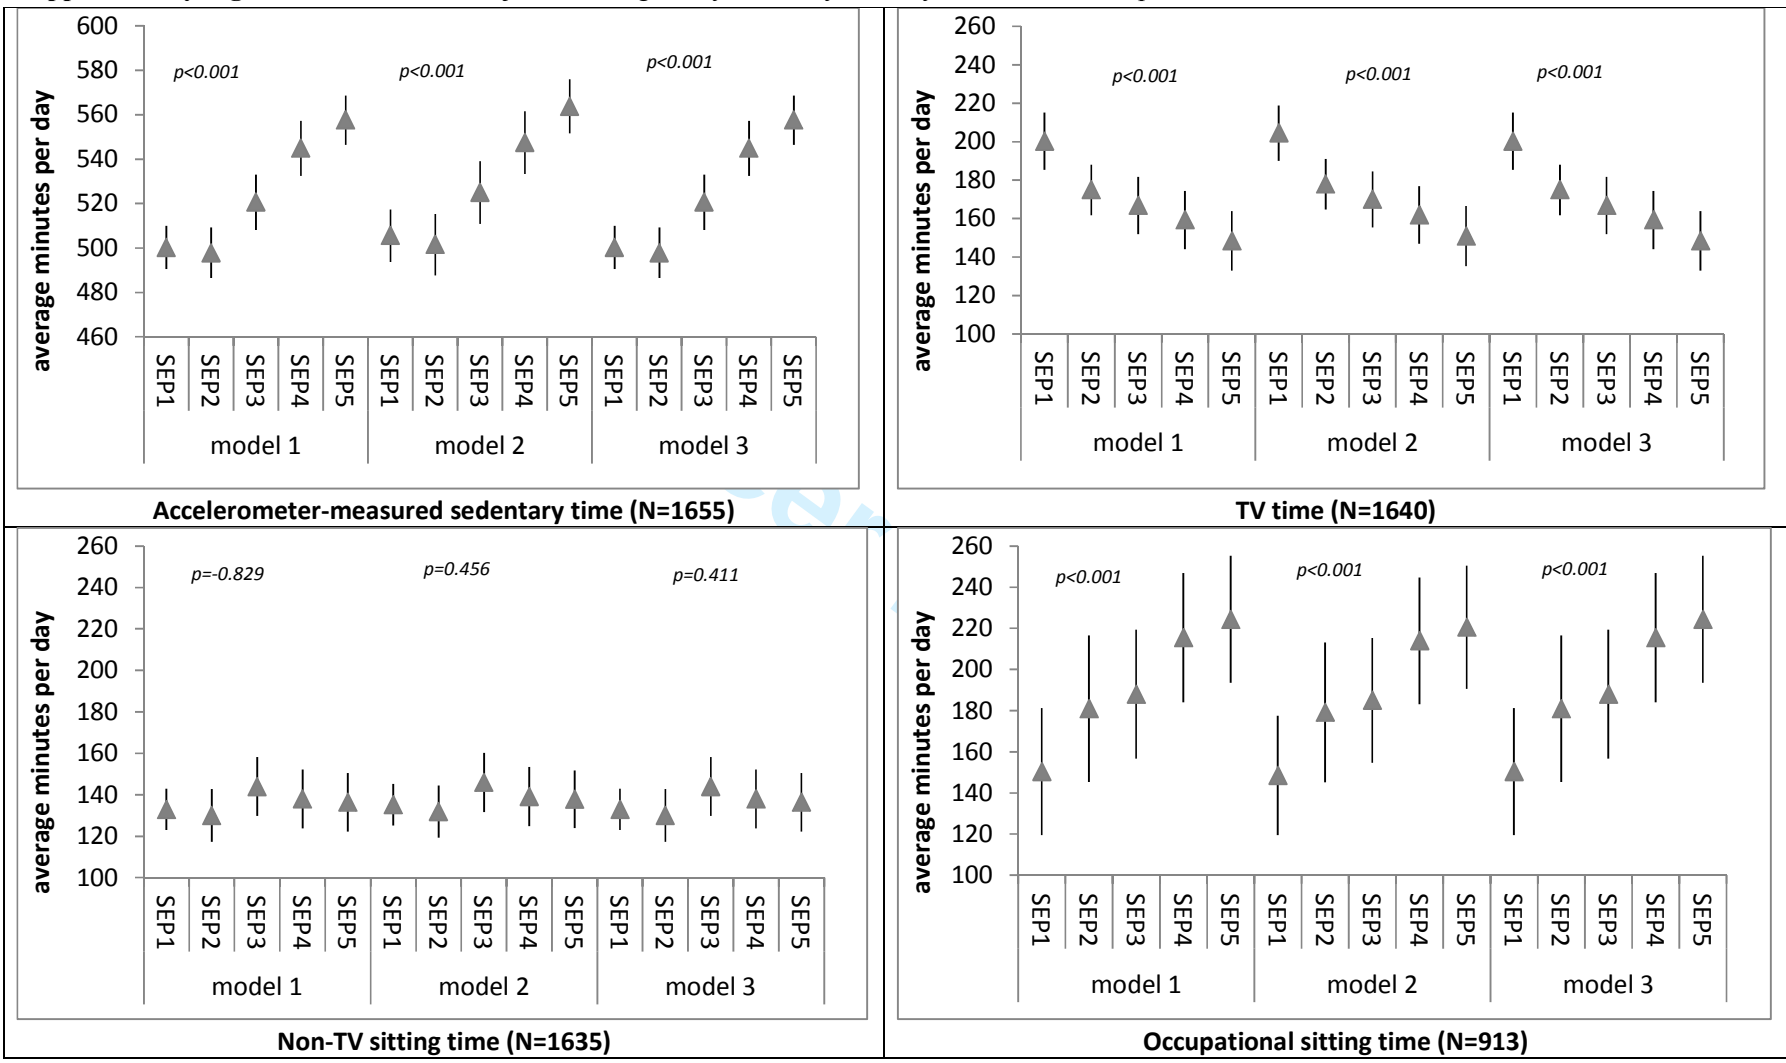

Model 1: adjusted for age and sex; model 2: further adjustments for area deprivation, BM, limiting long standing illness, difficulty with usual activities, car ownership, drinking frequency, and smoking status; model 3: further adjustments for self-reported time spent in MVPA, accelerometer-measured MVPA time, and average accelerometer wear time on valid days. Models with accelerometer sedentary time as the outcome were also adjusted for average accelerometer wear time on valid days.

<sup>a</sup> Coefficients represent estimated marginal means from generalised linear models, with 95% confidence intervals. Linear trend p values were obtained from linear regression.

<sup>b</sup> SEP1 indicates most deprived, SEP 5 indicates least deprived

Supplementary Figure S3: Multivariate-adjusted average daily sedentary time<sup>a</sup> by SEP score<sup>b</sup>. Weekdays.

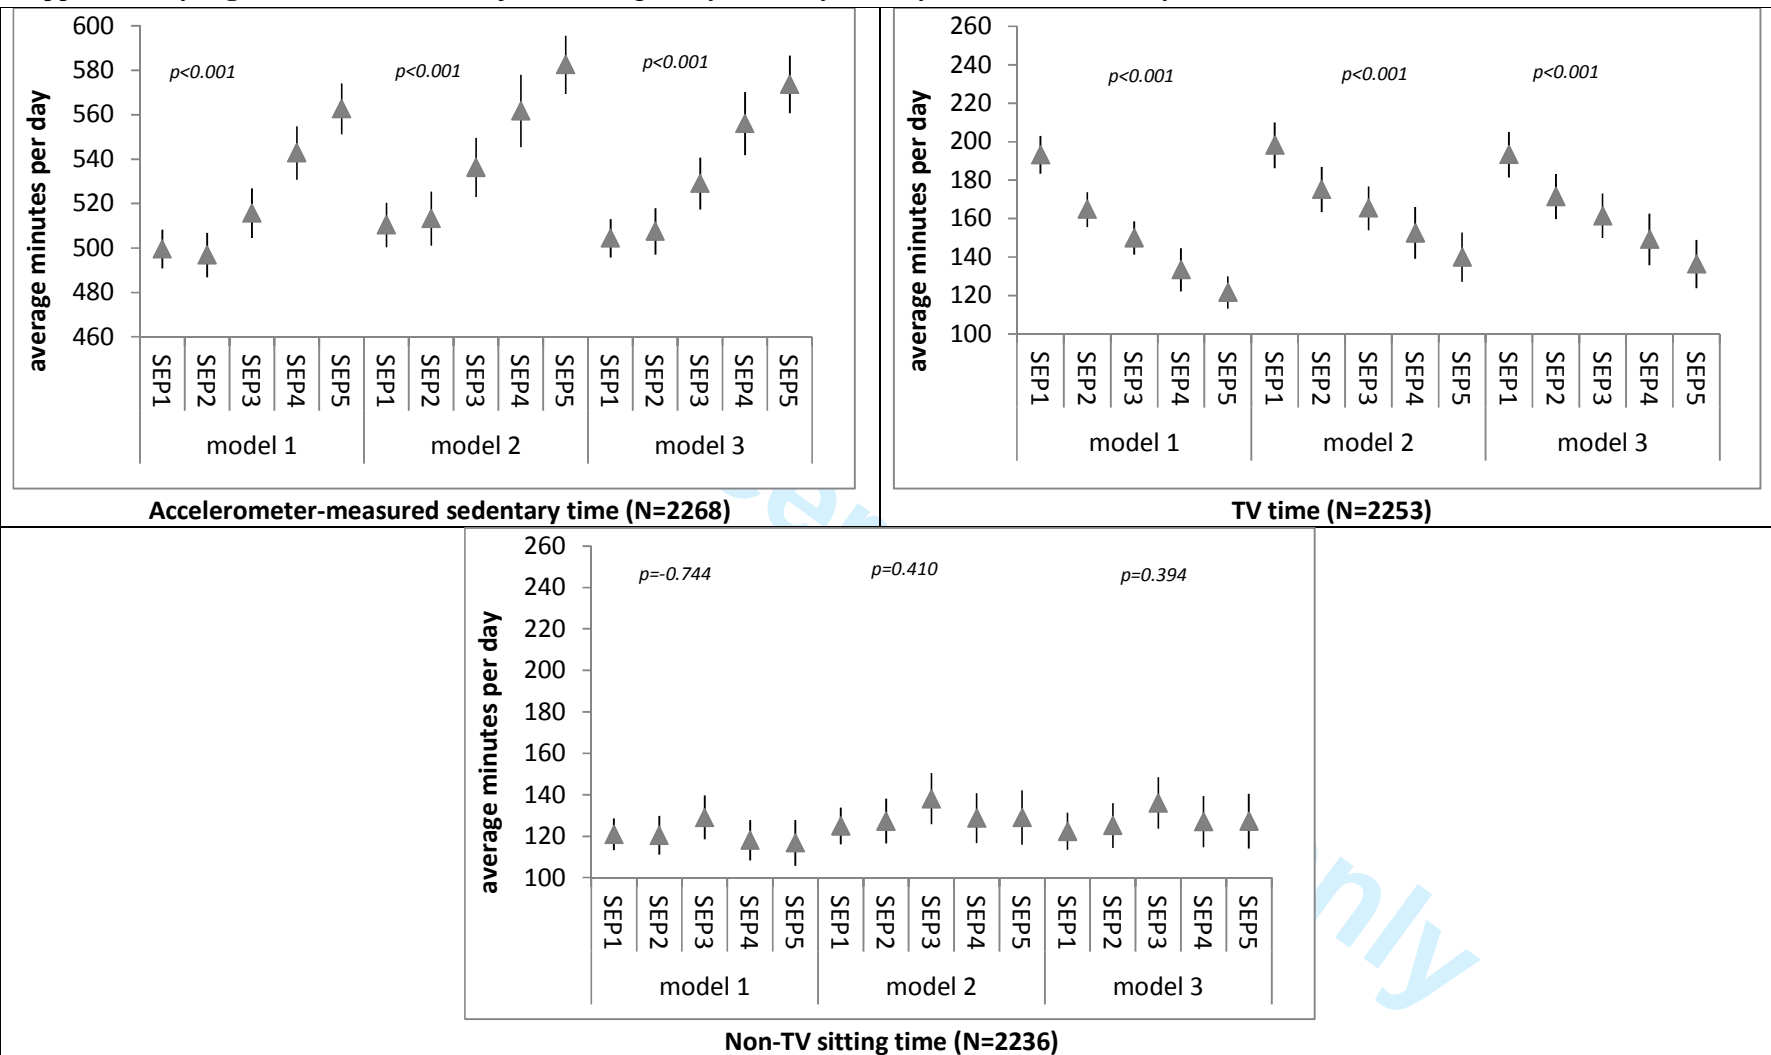

Model 1: adjusted for age and sex; model 2: further adjustments for area deprivation, BM, limiting long standing illness, difficulty with usual activities, car ownership, drinking frequency, and smoking status; model 3: further adjustments for self-reported time spent in MVPA, accelerometer-measured MVPA time, and average accelerometer wear time on valid days. Models with accelerometer sedentary time as the outcome were also adjusted for average accelerometer wear time on valid days.

<sup>a</sup> Coefficients represent estimated marginal means from generalised linear models, with 95% confidence intervals. Linear trend p values were obtained from linear regression.

<sup>b</sup> SEP1 indicates most deprived, SEP 5 indicates least deprived

Supplementary Figure S4: Multivariate-adjusted average daily sedentary time<sup>a</sup> by SEP score<sup>b</sup>. Weekend days.

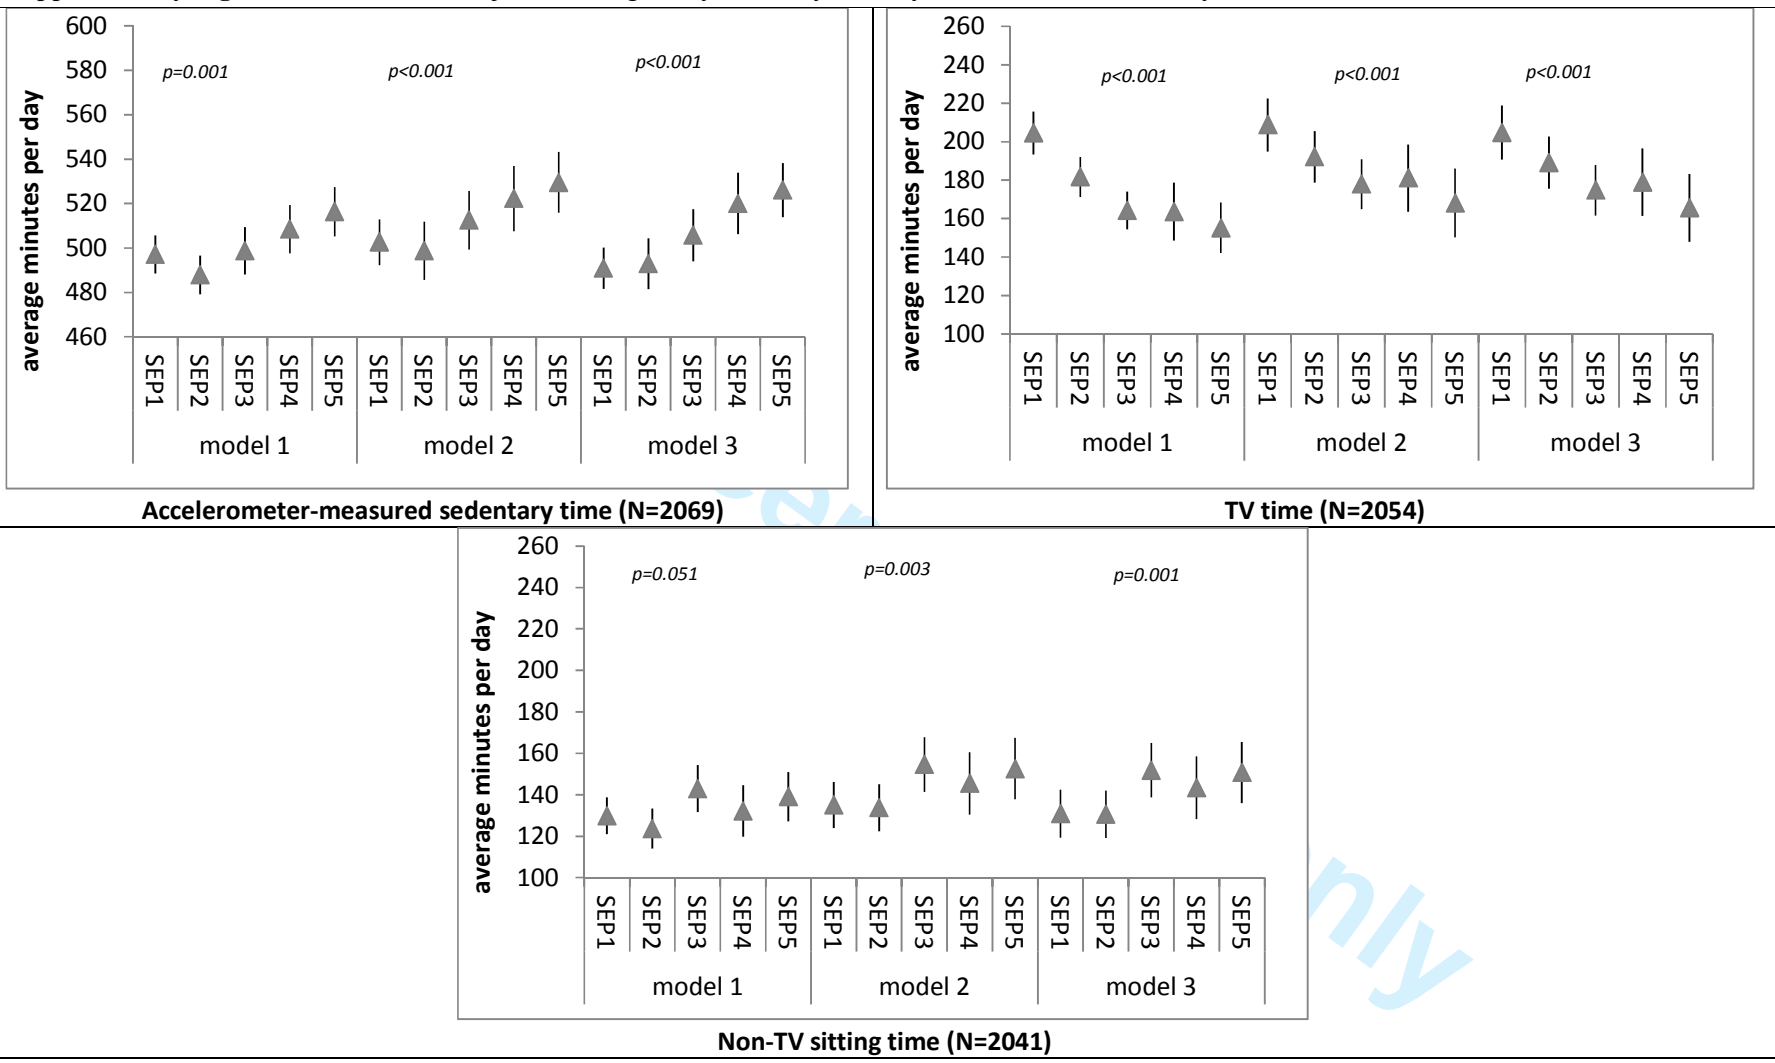

Model 1: adjusted for age and sex; model 2: further adjustments for area deprivation, BM, limiting long standing illness, difficulty with usual activities, car ownership, drinking frequency, and smoking status; model 3: further adjustments for self-reported time spent in MVPA, accelerometer-measured MVPA time, and average accelerometer wear time on valid days. Models with accelerometer sedentary time as the outcome were also adjusted for average accelerometer wear time on valid days.

<sup>a</sup> Coefficients represent estimated marginal means from generalised linear models, with 95% confidence intervals. Linear trend p values were obtained from linear regression.

<sup>b</sup> SEP1 indicates most deprived, SEP 5 indicates least deprived



STROBE 2007 (v4) Statement—Checklist of items that should be included in reports of *cross-sectional studies*

| Section/Topic                | Item # | Recommendation                                                                                                                                                                       | Reported on page # |
|------------------------------|--------|--------------------------------------------------------------------------------------------------------------------------------------------------------------------------------------|--------------------|
| Title and abstract           | 1      | (a) Indicate the study's design with a commonly used term in the title or the abstract                                                                                               | 2                  |
|                              |        | (b) Provide in the abstract an informative and balanced summary of what was done and what was found                                                                                  | 2                  |
| <b>Introduction</b>          |        |                                                                                                                                                                                      |                    |
| Background/rationale         | 2      | Explain the scientific background and rationale for the investigation being reported                                                                                                 | 3-4                |
| Objectives                   | 3      | State specific objectives, including any prespecified hypotheses                                                                                                                     | 4                  |
| <b>Methods</b>               |        |                                                                                                                                                                                      |                    |
| Study design                 | 4      | Present key elements of study design early in the paper                                                                                                                              | 6                  |
| Setting                      | 5      | Describe the setting, locations, and relevant dates, including periods of recruitment, exposure, follow-up, and data collection                                                      | 6-7                |
| Participants                 | 6      | (a) Give the eligibility criteria, and the sources and methods of selection of participants                                                                                          | 6                  |
| Variables                    | 7      | Clearly define all outcomes, exposures, predictors, potential confounders, and effect modifiers. Give diagnostic criteria, if applicable                                             | 7-8                |
| Data sources/<br>measurement | 8*     | For each variable of interest, give sources of data and details of methods of assessment (measurement). Describe comparability of assessment methods if there is more than one group | 6-8                |
| Bias                         | 9      | Describe any efforts to address potential sources of bias                                                                                                                            | 8                  |
| Study size                   | 10     | Explain how the study size was arrived at                                                                                                                                            | 10                 |
| Quantitative variables       | 11     | Explain how quantitative variables were handled in the analyses. If applicable, describe which groupings were chosen and why                                                         | 9-10               |
| Statistical methods          | 12     | (a) Describe all statistical methods, including those used to control for confounding                                                                                                | 9-10               |
|                              |        | (b) Describe any methods used to examine subgroups and interactions                                                                                                                  | 9-10               |
|                              |        | (c) Explain how missing data were addressed                                                                                                                                          | 9                  |
|                              |        | (d) If applicable, describe analytical methods taking account of sampling strategy                                                                                                   | 10                 |
|                              |        | (e) Describe any sensitivity analyses                                                                                                                                                | 9-10               |
| <b>Results</b>               |        |                                                                                                                                                                                      |                    |

|                          |     |                                                                                                                                                                                                              |       |
|--------------------------|-----|--------------------------------------------------------------------------------------------------------------------------------------------------------------------------------------------------------------|-------|
| Participants             | 13* | (a) Report numbers of individuals at each stage of study—eg numbers potentially eligible, examined for eligibility, confirmed eligible, included in the study, completing follow-up, and analysed            | 10-11 |
|                          |     | (b) Give reasons for non-participation at each stage                                                                                                                                                         | 10-11 |
|                          |     | (c) Consider use of a flow diagram                                                                                                                                                                           |       |
| Descriptive data         | 14* | (a) Give characteristics of study participants (eg demographic, clinical, social) and information on exposures and potential confounders                                                                     | 10-12 |
|                          |     | (b) Indicate number of participants with missing data for each variable of interest                                                                                                                          | 9     |
| Outcome data             | 15* | Report numbers of outcome events or summary measures                                                                                                                                                         |       |
| Main results             | 16  | (a) Give unadjusted estimates and, if applicable, confounder-adjusted estimates and their precision (eg, 95% confidence interval). Make clear which confounders were adjusted for and why they were included | 12    |
|                          |     | (b) Report category boundaries when continuous variables were categorized                                                                                                                                    | 7-10  |
|                          |     | (c) If relevant, consider translating estimates of relative risk into absolute risk for a meaningful time period                                                                                             | n/a   |
| Other analyses           | 17  | Report other analyses done—eg analyses of subgroups and interactions, and sensitivity analyses                                                                                                               | 14-15 |
| <b>Discussion</b>        |     |                                                                                                                                                                                                              |       |
| Key results              | 18  | Summarise key results with reference to study objectives                                                                                                                                                     | 15    |
| Limitations              | 19  | Discuss limitations of the study, taking into account sources of potential bias or imprecision. Discuss both direction and magnitude of any potential bias                                                   | 16-17 |
| Interpretation           | 20  | Give a cautious overall interpretation of results considering objectives, limitations, multiplicity of analyses, results from similar studies, and other relevant evidence                                   | 16-17 |
| Generalisability         | 21  | Discuss the generalisability (external validity) of the study results                                                                                                                                        | 17    |
| <b>Other information</b> |     |                                                                                                                                                                                                              |       |
| Funding                  | 22  | Give the source of funding and the role of the funders for the present study and, if applicable, for the original study on which the present article is based                                                | 18    |

\*Give information separately for cases and controls in case-control studies and, if applicable, for exposed and unexposed groups in cohort and cross-sectional studies.

**Note:** An Explanation and Elaboration article discusses each checklist item and gives methodological background and published examples of transparent reporting. The STROBE checklist is best used in conjunction with this article (freely available on the Web sites of PLoS Medicine at <http://www.plosmedicine.org/>, Annals of Internal Medicine at <http://www.annals.org/>, and Epidemiology at <http://www.epidem.com/>). Information on the STROBE Initiative is available at [www.strobe-statement.org](http://www.strobe-statement.org).

# BMJ Open

## Objectively-assessed and self-reported sedentary time in relation to multiple socioeconomic status indicators among adults in England

|                                 |                                                                                                                                                                                                                                                                                                                                                                                                 |
|---------------------------------|-------------------------------------------------------------------------------------------------------------------------------------------------------------------------------------------------------------------------------------------------------------------------------------------------------------------------------------------------------------------------------------------------|
| Journal:                        | <i>BMJ Open</i>                                                                                                                                                                                                                                                                                                                                                                                 |
| Manuscript ID:                  | bmjopen-2014-006034.R1                                                                                                                                                                                                                                                                                                                                                                          |
| Article Type:                   | Research                                                                                                                                                                                                                                                                                                                                                                                        |
| Date Submitted by the Author:   | 17-Sep-2014                                                                                                                                                                                                                                                                                                                                                                                     |
| Complete List of Authors:       | Stamatakis, Emmanuel; University of Sydney, Exercise and Sport Sciences & Charles Perkins Centre<br>Coombs, Ngaire; University of Southampton, Social Sciences<br>Rowlands, Alex; University of South Australia, Division of Health Sciences<br>Shelton, Nicola; University College London, Epidemiology and Public Health<br>Hillsdon, Melvyn; University of Exeter, Sport and Health Sciences |
| <b>Primary Subject Heading</b>: | Epidemiology                                                                                                                                                                                                                                                                                                                                                                                    |
| Secondary Subject Heading:      | Public health, Epidemiology, Sports and exercise medicine                                                                                                                                                                                                                                                                                                                                       |
| Keywords:                       | EPIDEMIOLOGY, PUBLIC HEALTH, SOCIAL MEDICINE                                                                                                                                                                                                                                                                                                                                                    |
|                                 |                                                                                                                                                                                                                                                                                                                                                                                                 |

SCHOLARONE™  
Manuscripts

**Title:** Objectively-assessed and self-reported sedentary time in relation to multiple socioeconomic status indicators among adults in England

**Running title:** Sedentary time and socioeconomic status

**Authors:** Emmanuel Stamatakis<sup>1 2 3</sup>, Ngaire Coombs<sup>3 4</sup>, Alex Rowlands<sup>5</sup>, Nicola Shelton<sup>3</sup>, Melvyn Hillsdon<sup>6</sup>.

<sup>1</sup>Charles Perkins Centre, University of Sydney, Australia

<sup>2</sup>Discipline of Exercise and Sport Sciences, Faculty of Health Sciences, University of Sydney, Sydney, Australia

<sup>3</sup>PARG (Physical Activity Research Group), Department of Epidemiology and Public Health, University College London, London, UK

<sup>4</sup>Department of Social Sciences, University of Southampton, UK

<sup>5</sup>Division of Health Sciences, University of South Australia, Australia

<sup>6</sup>Sport and Health Sciences, College of Life and Environmental Sciences, University of Exeter, UK

**Correspondence:** Emmanuel Stamatakis, Charles Perkins Centre, University of Sydney, Johns Hopkins Drive, Sydney, NSW 2050, Australia. Email:

[emmanuel.stamatakis@sydney.edu.au](mailto:emmanuel.stamatakis@sydney.edu.au), Telephone: +61 293519668.

**Wordcount:**

Abstract: 245 words

Main text: 3693 words

## Abstract

**Objectives:** To examine the associations between socioeconomic position (SEP) and multi-domain self-reported and objectively-assessed sedentary time (ST). **Design:** cross-sectional; **Setting:** general population households in England. **Participants:** 2289 adults aged 16-96 years who participated in the 2008 Health Survey for England. **Outcomes:** accelerometer-measured sedentary time, and self-reported television time, non-television leisure-time sitting and occupational sitting/standing. We examined multivariable associations between household income, social class, education, area deprivation each SEP indicator (including a 5-point composite SEP score computed by aggregating individual SEP indicators) and each ST indicator using generalised linear models. **Results:** Accelerometry-measured total ST and occupational sitting/standing were positively associated with SEP score and most of its constituent SEP indicators, while television time was negatively associated with SEP score and education level. Area-level deprivation was largely unrelated to ST. Those in the lowest composite SEP group spent 64 (95% CIs: 52 to 76) and 72 (48 to 98), fewer minutes/day in total ST and occupational sitting/standing compared to those in the top SEP group, and an additional 48 (35 to 60) minutes/day watching television ( $p < 0.001$  for linear trend). Stratified analyses showed that these associations between composite SEP score and total ST were evident only among participants who were in employment. **Conclusions:** Occupational sitting seems to drive the positive association between socioeconomic position and total sedentary time. Lower socioeconomic position is linked to higher TV viewing times.

## Article summary

1  
2  
3 *Strengths and limitations of this study:*  
4  
5

- 6 • First study of its kind to use objective sedentary behaviour measurements
- 7
- 8 • Broad range of self-reported sedentary behaviour types
- 9
- 10 • Broad set of socioeconomic status markers including are-level deprivation
- 11
- 12 • This is a cross-sectional design
- 13
- 14 • The occupational sedentary time question and accelerometry cannot
- 15
- 16 differentiate between sitting and standing
- 17
- 18
- 19
- 20
- 21
- 22
- 23
- 24
- 25
- 26
- 27
- 28
- 29
- 30
- 31
- 32
- 33
- 34
- 35
- 36
- 37
- 38
- 39
- 40
- 41
- 42
- 43
- 44
- 45
- 46
- 47
- 48
- 49
- 50
- 51
- 52
- 53
- 54
- 55
- 56
- 57
- 58
- 59
- 60

**Keywords**

Socioeconomic status; television; sedentary behaviour; inequality; physical activity;  
accelerometer;

## Introduction

Recent studies show that sedentary time (defined as an energy expenditure rate below 1.5 metabolic equivalents<sup>1</sup>, often characterised by activities involving sitting) is linked to increased all-cause<sup>2-5</sup> and cardiovascular<sup>2,3</sup> mortality risk independently of leisure-time physical activity participation. Television viewing, one of the most common sedentary time (ST) activities, has been specifically linked to all-cause and cardiovascular mortality and type 2 diabetes<sup>6</sup>. Objective data show that adults in England spend approximately nine to 10 hours a day being sedentary on average, out of which approximately 4 hours/day is TV watching<sup>7,8</sup>. Assuming that the average waking day lasts for 16 hrs, total sedentary time accounts for some 55-65% of total waking time. For working age adults a substantial proportion of total sedentary time takes place while at work, 56% of working English men and 50% of women report more than 5 hrs /day being sedentary while at work<sup>7</sup>.

Socioeconomic position (SEP) is a broad term that encompasses a range of characteristics, including occupational type and employment status, purchasing capacity and ownership, educational level and deprivation. Accordingly, there are several SEP indices each of which measures different aspects of social standing. Overall, SEP is a strong predictor of premature mortality and chronic disease occurrence including cardiovascular disease (CVD)<sup>9</sup> and diabetes<sup>10</sup> with individuals in lower SEP being considerably more likely to fall ill and die prematurely. Although there is no consensus on the origins of the socioeconomic gradient in health, one of the suggested pathways involves higher prevalence of poor health behaviours (e.g. physical inactivity and smoking) among lower socioeconomic groups<sup>11</sup>.

We have previously shown that lower SEP is linked consistently with increased TV viewing and other recreational screen time in Scottish adults<sup>12</sup>, a finding that has been confirmed by studies in other countries such as Belgium<sup>12,13</sup>, Australia<sup>14,15</sup>, and the US<sup>16</sup> that used TV as a

1  
2  
3 proxy for ST. However, these findings are not necessarily generalizable to overall sedentary  
4  
5 or sitting time because TV viewing is a complex exposure that seems to be a poor index of  
6  
7 overall ST<sup>17</sup>. In a recent study comparing associations between TV time and objectively  
8  
9 measured sedentary time, associations were of fair magnitude, but were not consistent across  
10  
11 population sub-groups<sup>18</sup>. The results of the few studies that looked at overall (self-reported)  
12  
13 sitting in relation to SEP are inconsistent. Higher social position was linked to higher overall  
14  
15 sitting time among Australian women<sup>19</sup> but education level was unrelated to sitting time  
16  
17 among Portuguese adults<sup>20</sup>. Objective measuring methodologies such as accelerometers and  
18  
19 inclinometers can give more comprehensive and complete estimates of total sedentary  
20  
21 behaviour than partial self-reported indices such as TV viewing, or self-reported total sitting  
22  
23 time, which may be more difficult to recall than TV viewing and therefore be subject to more  
24  
25 measurement error. Besides, SEP characteristics that relate to occupational class and income  
26  
27 will naturally have an impact on work time sitting. For example, manual unskilled workers  
28  
29 normally spend less time sitting during work than professionals in managerial office-based  
30  
31 jobs<sup>21</sup>. Similarly, higher incomes and the associated spending capacity might impact on the  
32  
33 time spent sitting driving a car or commuting. To our knowledge, no study has looked at the  
34  
35 associations between SEP defined using education, occupational class, income and area  
36  
37 deprivation indices, and SB estimated using self-reported sitting across different domains as  
38  
39 well as objective methods.  
40  
41  
42  
43  
44

45  
46 The aim of this study was to look at the associations between multiple SEP indicators and  
47  
48 self-reported indices of sitting time and SB as well as objectively-assessed total SB time. We  
49  
50 used data from one of the largest European accelerometry general population studies, the  
51  
52 2008 Health Survey for England.  
53  
54

## 55 56 **Methods** 57 58 59 60



### ***Study Sample***

The Health Survey for England (HSE) is a repeated nationally representative study of individuals living in private households in England. We drew our sample from the 2008 HSE which had a special focus on physical activity and sedentary behaviour. The sample is drawn using multi-stage stratified probability sampling with postcode sectors as the primary sampling unit. More details of the sample design are available elsewhere<sup>8</sup>. The overall interview household response rate for the main sample of 15,102 adults was 64%, and for the accelerometer sub-sample of 4,507 adults was 73%<sup>8</sup>. In this analysis we included adults aged 16 and over (age range 16-96 years) who had both valid accelerometry and self-reported SB data. Participants provided written informed consent. An abridged methods section is presented here: the full methods section with more information can be found in supplementary file S1 (Unabridged Methods). Ethical approval was obtained from the Oxford Research Ethics Committee (reference number 07/H0604/102).

### ***Demographics and contextual variables***

Trained fieldworkers assessed participants' demographics, self-rated health, long standing illness, alcohol consumption and smoking using Computer Assisted Personal Interviewing. Height was measured using a standard stadiometer with a sliding head plate, a base plate and three connecting rods marked with a metric measuring scale. Participants were asked to remove their shoes. One measurement was taken, with the participant stretching to the maximum height. Weight was measured using Tanita electronic scales with a digital display (Tanita Corporation, Japan). Participants were asked to remove their shoes and any bulky clothing and a single measurement was recorded to the nearest 100g.<sup>7</sup> Body mass index (BMI) was computed as weight (kilograms) divided by squared height (metres).

### *Socioeconomic position measures*

Social class (of the household reference person) was determined by asking questions on participants' occupation and using the Registrar General's classification to group them as I&II (professional and managerial/technical), III Non-manual, III manual, IV&V (semi-skilled manual and unskilled manual). Equivalised household income was grouped into quintiles. Highest education qualification was coded as no qualification and three levels: Level 1 represents secondary school or below (NVQ1/CSE and NVQ2/GCE O Level equivalent); Level 2 represents post-compulsory secondary school (NVQ3/GCE A Level equivalent) and Level 3 represents higher education (higher education below Degree and NVQ4/NVQ5/Degree or higher). Area deprivation was assessed using the 2004 Index of Multiple Deprivation (IMD), a continuous score that we grouped into quintiles (1 representing the most deprived quintile, and 5 representing the least deprived).

### *Sedentary time and physical activity measures*

A random sub-sample of HSE 2008 participants were selected to wear a uniaxial accelerometer (Actigraph model GT1M, Pensacola, Florida) during waking hours for seven consecutive days. Consistent with previous epidemiological SB studies<sup>22</sup>, the sampling epoch was one minute and non-wear time was defined as periods of at least 60 consecutive minutes of zero minutely counts, with allowance for up to 2 consecutive minutes of 1–100 counts/minute. For a day to be 'valid' for inclusion in the analyses, participants had to have worn the accelerometer for a minimum of 600 minutes. Participants with at least one day of valid wear were included in these analyses.<sup>22</sup>

1  
2  
3 Self-reported sedentary time was assessed using a set of questions on the usual  
4 week/weekend day in the last four weeks prior to the interview time spent on: a) TV  
5 (including DVDs and videos) viewing; and b) any other sitting during non-work times,  
6 including reading and computer use. For those participants who were economically active  
7 another set of questions assessed the average daily times spent sitting or standing while at  
8 work<sup>17</sup>. While it is not ideal to include standing as a measure of sedentary time, it is often  
9 necessitated by the unavailability of sitting-specific data, and standing is routinely included in  
10 objectively measured sedentary data as accelerometers are unable to differentiate between  
11 time spent sitting or standing. Like previously<sup>17</sup> for the purposes of this study standing will  
12 be considered a measure of sedentary behaviour.  
13  
14  
15  
16  
17  
18  
19  
20  
21  
22  
23  
24

25  
26 Physical activity questions included frequency (number of days in the last 4 weeks) and  
27 duration (minutes per day) of participation in walking for any purpose, domestic physical  
28 activity<sup>12,23</sup>, and any recreational sports and exercise including cycling for any purpose<sup>24</sup>.

29  
30  
31 Both the physical activity and the SB questions have been validated against accelerometry.<sup>25</sup>  
32  
33  
34

### 35 36 ***Data handling/Statistical analysis***

#### 37 38 *Regrouping the Socioeconomic position variables*

39  
40 Due to small numbers of observations, the top and bottom two categories of social class were  
41 collapsed, resulting in four categories: unskilled /semi-skilled manual; skilled manual; skilled  
42 non-manual; and managerial/technical/ professional. Using existing methods<sup>12</sup>, we derived a  
43 composite Socioeconomic Position (SEP) score using household income, individual  
44 education, and occupational social class of the head of household. The lowest category of  
45 each component variable was assigned a SEP score of 0, with the highest category given a  
46 SEP score of 4. The scores for each individual SEP indicator were then aggregated, resulting  
47 in a SEP score ranging from 0 to 12. Due to small numbers of observations in the high end of  
48  
49  
50  
51  
52  
53  
54  
55  
56  
57  
58  
59  
60

1  
2  
3 the score, the top SEP score was collapsed into five categories of comparable sample size:  
4  
5 SEP1 consisted of the lowest two SEP categories (0 and 1), SEP2 comprised categories 2 and  
6  
7 3, SEP3 comprised categories 4 and 5, SEP4 comprised categories 6 and 7, and SEP5  
8  
9 comprised of categories 8 and 9 (the highest observed SEP category).  
10

### 11 12 *Deriving sedentary time and physical activity variables*

13  
14  
15 Week- and weekend day-specific TV and non-TV leisure time sitting were converted to all-  
16  
17 week time (minutes) using the following formula: (weekday time  $\times$  5) + (weekend day time  $\times$   
18  
19 2) / 7. Occupational sitting/standing time (minutes) per day was calculated by multiplying the  
20  
21 number of days worked per week by the average time spent sitting/standing at work on a  
22  
23 work day, and dividing by 7. Weekly self-reported MVPA hours/week were calculated as  
24  
25 number of days of participation multiplied by time per day in each activity type<sup>7 8</sup> Due to the  
26  
27 large number of participants and the very skewed distribution, self-reported MVPA was  
28  
29 categorised in to none, less than 30 minutes, 30 minutes to 1 hour, 1 to 2 hours, and more  
30  
31 than 2 hours of MVPA per day. For the accelerometry data we used 0-99 counts/minute to  
32  
33 denote sedentary ( $<1.5$  MET)<sup>3</sup> and  $\geq 2,020$  counts/minute to denote MVPA ( $>3$  MET)<sup>26</sup>.  
34  
35 Accelerometry-measured variables were converted to time (minutes) per valid day.  
36  
37  
38  
39  
40  
41  
42

### 43 *Missing data and multiple imputation*

44  
45 Outliers outside 3 standard deviations of the mean for all continuous variables apart from age  
46  
47 were removed from the analyses to improve normality. This excluded 1.3% to 2.2% of cases  
48  
49 from each continuous variable. Due to a substantial proportion of cases with at least one  
50  
51 missing value in at least one covariable or exposure variable (22% to 28% depending on the  
52  
53 exposure variable) we performed multiple imputation. IBM SPSS v20 was used to conduct  
54  
55 the multiple imputation, missing values were imputed for all covariables and exposures, with  
56  
57  
58  
59  
60

1  
2  
3 observed maximum and minimum values used as constraints. Outcome variables did not have  
4  
5 missing values imputed, but were included in the imputation models to predict missing values  
6  
7 in other variables. Linear regression was used as the type of imputation, and 5 cycles of  
8  
9 imputation were conducted resulting in 5 imputed datasets. Results from these 5 datasets  
10  
11 were combined using the multiple imputation module in SPSS to provide pooled results. The  
12  
13 imputed sample size is limited to the number of valid observations for each outcome variable  
14  
15 (2289 for accelerometry-measured ST, 2279 for TV time, 2253 for non-TV sitting time, and  
16  
17 1170 for occupational sitting time). Non-imputed results are presented in the appendix.  
18  
19

### 20 21 22 23 *Statistical analysis*

24  
25  
26 Analyses were weighted for non-response to give a sample that was representative of adults  
27  
28 living in England. The associations between each of the socioeconomic indicators  
29  
30 (household income, social class, education, SEP score, and area deprivation,) and each  
31  
32 individual ST indicator (TV time, non-TV sitting time, occupational sitting/standing, and  
33  
34 accelerometry-measured ST) were examined using generalised linear models, and by multiple  
35  
36 linear regression to determine linear trend p values. Results are presented for the whole week,  
37  
38 the weekday/weekend day-specific results can be found in the online appendix. We also  
39  
40 repeated the SEP score analyses stratified by economic activity (employed/self-employed vs  
41  
42 non-economically active). SPSS version 21 was used for all analyses. For all multivariate  
43  
44 analyses we used the complex samples generalised linear models (GLM) procedure to take  
45  
46 into account the complex survey design. Different models were adjusted for: 1) age and sex;  
47  
48 2) additionally for BMI, limiting long standing illness, difficulty with usual activities, car  
49  
50 ownership, drinking frequency, smoking status, and other socioeconomic indicators  
51  
52 (household income, social class, area deprivation); 3) additionally for time spent in self-  
53  
54 reported MVPA or accelerometry-measured MVPA as appropriate, and average  
55  
56  
57  
58  
59  
60

1  
2  
3 accelerometer wear time on valid days. Models 2 and 3 with accelerometry-measured ST as  
4  
5 the outcome were also adjusted for average accelerometer wear time on each valid day. This  
6  
7 work conforms with the STROBE statement for observational studies.<sup>27</sup>  
8  
9

## 10 11 12 **Results**

### 13 14 *Descriptives*

15  
16  
17  
18 2289 adults (1030 males) provided valid accelerometry data, with 2279 (1020 males) and  
19  
20 2253 (1014 males) also providing self-reported TV and non-TV time respectively. 1170 (576  
21  
22 males) provided occupational sitting/standing time. Table 1 presents the sample  
23  
24 characteristics of the accelerometry sample by SEP score group (prior to MI) with casewise  
25  
26 deletion of missing values (N=1651). In total 628 participants in the accelerometry sample  
27  
28 had at least one covariate imputed. The variables with the most imputed values were  
29  
30 household income (361 imputed) and BMI (233 imputed). Participants from lower SEP  
31  
32 groups were more likely to be female, older, have a higher BMI, spend less time sedentary  
33  
34 overall and sitting at work, but spend more time watching TV than individuals in higher SEP  
35  
36 groups. Lower SEP individuals were also more likely to report a limiting longstanding illness  
37  
38 and difficulties with usual daily activities, and be a current cigarette smoker, but less likely to  
39  
40 be a heavy drinker and meet physical activity guidelines. The mean wear time on valid days  
41  
42 was 831 minutes. The mean number of valid days (for those with at least 1 valid day) was  
43  
44  
45  
46  
47 6.0 days.  
48  
49  
50  
51  
52  
53  
54  
55  
56  
57  
58  
59  
60

**Table 1:** Sample Characteristics by Socioeconomic Position Score

|                                                                        | SEP Score Group            |               |                             | <i>p</i> |
|------------------------------------------------------------------------|----------------------------|---------------|-----------------------------|----------|
|                                                                        | 1 (lowest) & 2<br>(N=521)* | 3<br>(N=355)* | 4 & 5 (highest)<br>(N=775)* |          |
| <i>Categorical variables<sup>a</sup></i>                               |                            |               |                             |          |
| Sex (% male)                                                           | 40.1                       | 47.0          | 50.5                        | 0.001    |
| Limiting longstanding illness (%)                                      | 32.8                       | 24.5          | 16.8                        | <0.001   |
| Adherence to the physical activity guidelines (self-reported data) (%) | 32.6                       | 43.9          | 49.6                        | <0.001   |
| Difficulty in performing usual activities (%)                          | 21.5                       | 14.9          | 7.8                         | <0.001   |
| Car or van available (%)                                               | 73.9                       | 89.9          | 94.7                        | <0.001   |
| Drinking frequency (% ≥5 times /week)                                  | 15.9                       | 23.1          | 24.9                        | <0.001   |
| Smoking (% current)                                                    | 27.1                       | 23.9          | 15.5                        | <0.001   |
| Employment status (% employed/self-employed)                           | 35.2                       | 64.8          | 76.3                        | <0.001   |
| <i>Continuous variables<sup>b</sup></i>                                |                            |               |                             |          |
| Age (years)                                                            | M (SD)                     | M (SD)        | M (SD)                      | <i>P</i> |
| Age (years)                                                            | 56.1 (18.5)                | 50.4 (16.6)   | 46.9 (15.9)                 | <0.001   |
| BMI (kg/m <sup>2</sup> )                                               | 28.0 (4.9)                 | 27.4 (4.9)    | 26.8 (4.5)                  | <0.001   |
| Sedentary time (accelerometry data) (Minutes/day)                      | 505.6 (97.7)               | 499.4 (90.7)  | 528.7 (87.2)                | <0.001   |
| TV (Minutes/day)                                                       | 218.6 (117.3)              | 175.8 (97.7)  | 145.0 (74.7)                | <0.001   |
| Non-TV sitting time (Minutes/day)                                      | 128.1 (86.4)               | 121.5 (90.6)  | 133.2 (86.3)                | 0.110    |
| Occupational sitting/standing time (Minutes/day)                       | 151.8 (116.5)              | 173.5 (120.9) | 198.1 (121.9)               | <0.001   |
| MVPA time per day (accelerometry data) (Minutes/day)                   | 24.7 (24.1)                | 29.7 (26.3)   | 32.0 (25.1)                 | <0.001   |

\* Occupational sitting time SEP 1 N=152 SEP 2 N=214; SEP 3 N=549 for SEP 4 & 5

<sup>a</sup> Chi Square was used to test significance of association between categorical variables and social class

<sup>b</sup> Anova was used to test significance of association between continuous variables and social class

### *Composite Socioeconomic position and sedentary time*

Figure 1 presents the GLM estimated marginal means and their 95% CIs describing the associations between composite SEP score and each measure of ST. SEP was positively associated with accelerometry-measured ST and occupational sitting/standing time, and inversely associated with TV time in all models. There were no associations between SEP and non-TV sitting time. Adjustments for potential confounders made no material difference to all above associations. Figure 2 presents associations between SEP score and accelerometry-measured ST, stratified by employment status. SEP score was positively associated with accelerometry-measured ST for those in employment only. SEP was inversely associated with TV time regardless of employment status, while non-TV leisure-time sitting was positively associated with SEP (SEP1 coefficient 134, 95% CI 125 to 145; SEP5 coefficient 177, 155 to 198), but only for those not in employment. However this association was not linear (data not shown).

### *Equivalised Household income and sedentary time*

Figure 3 presents associations between household income and each measure of ST. Household income was positively associated with accelerometer-measured ST and occupational sitting time and these associations persisted following adjustments for MVPA and other confounders. Like with SEP score, household income was inversely associated with TV time, although this association was attenuated to the null following adjustments for potential confounders in models 2 and 3. Household income was not associated with non-TV sitting time.

### *Educational attainment and sedentary time*



1  
2  
3 Figure 4 presents the associations between the highest educational qualification and each  
4  
5 measure of ST. Educational attainment was positively associated with accelerometry-  
6  
7 measured ST and inversely associated with TV time in all models. Occupational  
8  
9 sitting/standing time was inversely associated with education but the association did not  
10  
11 appear to be linear (it was evident across the lowest three educational levels only) and was  
12  
13 attenuated to the null following adjustments for potential confounders. There was a weak  
14  
15 positive association between education and non-TV sitting time, following adjustments for  
16  
17 potential confounders in models 2 and 3.  
18  
19

#### 20 21 *Occupational social class and sedentary time*

22  
23  
24 As shown in Figure 5, occupational social class was positively associated with  
25  
26 accelerometry-measured ST and occupational sitting/standing. The initial inverse association  
27  
28 with TV time (model 1) was attenuated to the null following adjustments for potential  
29  
30 confounders. Similarly to SEP score and income, social class was not associated with non-  
31  
32 TV sitting time.  
33  
34

#### 35 36 *Area deprivation and sedentary time*

37  
38  
39 Area-level deprivation was positively associated with TV time (the lower the deprivation the  
40  
41 lower the TV time) but these associations did not persist in the adjusted models (Figure 6).  
42  
43 Area deprivation was not associated with any other measures of ST (Figure 6).  
44  
45

#### 46 47 *Differential associations between imputed and non-imputed data*

48  
49  
50 There were no differences between the imputed and non-imputed models describing the  
51  
52 associations between SEP score and ST indicators, although the 95% confidence intervals  
53  
54 were slightly broader in the unimputed models due to the lower sample size (see  
55  
56 supplementary Figure S2).  
57  
58  
59  
60

### *Differential associations in weekday Vs weekend days*

There was no consistent pattern of differences in the associations of SEP and ST by weekend vs weekday (see supplementary Figures S3 and S4), time of the week-specific results showed broadly the same pattern as the whole week. The only notable difference was that a direct association between SEP and non-TV sitting time was observed on weekend days, but not on weekdays.

### **Discussion**

Literature on the socio-economic gradient of sedentary behaviour is very limited and has relied on partial sedentary behaviour indicators, mostly TV viewing. To our knowledge, this study is the only one that considers four indicators of socioeconomic position in relation to four indicators of sedentary behaviour, allowing a much more in-depth examination of the associations of interest than in previous studies. Our study suggests that occupational ST is what drives the positive association between overall SEP and total ST as there was no association among those not in employment (Figure 2). The difference between the lowest and highest SEP groups (Figure 1) is in the region of 60-70 minutes per day for both total accelerometry-measured sedentary time and occupational sitting/standing time and this is comparable with the difference between the extreme SEP group among the economically active part of the sample (~90 minutes/day). Our findings agree with an Australian study<sup>19</sup> which found that among women, full-time work, skilled occupations, and university education were all associated with high (self-reported) total sitting time. Our study also found that the inverse association between TV time and SEP was significant regardless of employment status. In a study of Dutch workers, sitting time at work varied considerably by type of occupation but not sitting during leisure time<sup>28</sup>.

1  
2  
3 Previous studies of adults in Belgium <sup>13</sup> and Australia <sup>14 15 29</sup> have reported inverse  
4  
5 associations between SEP indicators and TV time. We observed the same TV time pattern  
6  
7 with SEP score and education but not with occupational class, household income or area  
8  
9 deprivation. Although the occupational class and household income data were suggestive of  
10  
11 a weak association with TV time, our current results somehow contradict our study in  
12  
13 Scottish adults, <sup>12</sup> where all SEP indicators (occupational class, household income or area  
14  
15 deprivation) as well as the composite SEP score were associated with recreational screen time  
16  
17 (including TV time). Explanations for this might be that the Scottish study was three times  
18  
19 larger in size (which might have made it easier for data patterns to emerge) and the inclusion  
20  
21 of non-TV screen time as an outcome, although studies from other countries suggest no clear  
22  
23 pattern between non-TV recreational screen time (e.g. computer use) and SEP <sup>30 15</sup>.  
24  
25  
26 Nevertheless, both our English and the Scottish studies demonstrate that when education,  
27  
28 occupational social class and income are combined into a single measure (SEP score) they are  
29  
30 a much more powerful predictor of sedentary time than any single indicator, perhaps because  
31  
32 they collectively capture actual socioeconomic position more thoroughly than any single  
33  
34 indicator. Composite SEP score showed a clear and consistent pattern with all ST outcomes,  
35  
36 although each of the individual/household-level SEP indicators seemed to influence each ST  
37  
38 outcome in various ways, suggesting there are complex, interacting, multi-dimensional  
39  
40 influences of SEP on ST. Accelerometry-measured ST was the only sedentary behaviour  
41  
42 variable that showed clear and consistent (positive) associations with all SEP variables  
43  
44 (except from area-level deprivation). Although the cross-sectional design of this study  
45  
46 precludes causal inferences, the pattern of the accelerometry-based associations we observed  
47  
48 suggests that it is unlikely that total sedentary behaviour contributes to the well-documented  
49  
50 socioeconomic inequalities in health. <sup>11</sup>  
51  
52  
53  
54  
55  
56  
57  
58  
59  
60

1  
2  
3 Strengths of our study include the availability of both objectively-measured and self-reported  
4 indicators of sedentary behaviour which allowed us to be more thorough and detailed when  
5 examining the associations of interest. Accelerometers can capture total sedentary time more  
6 comprehensively than any partial self-reported indicator and as such are able to better  
7 quantify the socioeconomic gradient of ST as a contributor to health inequalities, however a  
8 limitation is that accelerometers do not distinguish between sitting and standing which have  
9 different health implications, this also applies to occupational sitting/standing time. It has  
10 been argued that standing should not be considered a sedentary behaviour<sup>31</sup>. This limitation  
11 is also pertinent to the self-reported ST assessment as standing time was included in the  
12 occupational ST question. Taken together, these limitations of the measurements may, to  
13 some extent, have confounded the associations of SEP with total and occupational ST we  
14 reported. Another limitation is that our study was limited to the accelerometry sample of  
15 HSE 2008 and this might have led to our sample being less representative of the target  
16 population. Although those in the subsample offered the accelerometer were older and more  
17 likely to be retired and to be less healthy than the rest of the adult Health Survey for England  
18 sample, those who refused to wear an accelerometer were similar in terms of employment  
19 status and area-level deprivation compared to those who wore the accelerometers for at least  
20 four days a week<sup>32</sup>. Higher SEP is linked to higher commuting by car<sup>33</sup> and this may partly  
21 explain the socioeconomic gradient but our data are limited in that there was no specific  
22 question on commuting-related sitting to examine this explanation.  
23  
24  
25  
26  
27  
28  
29  
30  
31  
32  
33  
34  
35  
36  
37  
38  
39  
40  
41  
42  
43  
44  
45  
46  
47  
48  
49  
50

## 51 **Conclusions**

52  
53  
54 Objectively-measured total sedentary time and occupational sedentary time are higher among  
55 economically active English adults in higher socioeconomic groups compared to less  
56  
57  
58  
59  
60

1  
2  
3 privileged groups. However, TV viewing is lower in higher socioeconomic groups regardless  
4  
5 of economic activity. Combining different socioeconomic indicators appears to have  
6  
7 composite power as a predictor of sedentary time.  
8  
9

10  
11  
12  
13 **Funding:** This work was funded by the National Institute for Health Research through a Career  
14  
15 Development Fellowship (ES). NC is also funded by the National Institute for Health Research  
16  
17 through the same source. The views expressed in this article are those of the authors and not the  
18  
19 English Department of Health or the National Institute for Health Research.  
20

21  
22 **Data Sharing:** No additional data are available  
23

24  
25 **Competing interests:** None of the authors have any competing interests to declare  
26

27  
28 **Authors' Contributions:** All authors have contributed sufficiently, ES conceived the idea, prepared  
29  
30 the dataset, drafted most of the manuscript and revised the manuscript several times. NC did the  
31  
32 statistical analysis under the supervision of ES and prepared the Tables, Figures and Supplemental  
33  
34 Online material. AR processed the accelerometry files. NS, MH and AR redrafted parts of the  
35  
36 manuscript and critically evaluated the whole material. All authors approved the final version before  
37  
38 submission.  
39  
40  
41  
42  
43  
44  
45  
46  
47  
48  
49  
50  
51  
52  
53  
54  
55  
56  
57  
58  
59  
60

## References

1. Pate RR, O'Neill JR, Lobelo F. The evolving definition of "sedentary". *Exercise and Sport Sciences Reviews* 2008;**36**(4):173-78.
2. Katzmarzyk PT, Church TS, Craig CL, et al. Sitting Time and Mortality from All Causes, Cardiovascular Disease, and Cancer. *Med Sci Sports Exerc* 2009;**41**(5):998-1005.
3. Matthews C, George SM, Moore SC, et al. Amount of time spent in sedentary behaviors and cause-specific mortality in US adults. *Am J Clin Nutr* 2012;**95**(2):437-45.
4. Patel AV, Bernstein L, Deka A, et al. Leisure Time Spent Sitting in Relation to Total Mortality in a Prospective Cohort of US Adults. *Am J Epidemiol* 2010;**172**(4):419-29.
5. van der Ploeg HP, Chey T, Korda RJ, et al. Sitting Time and All-Cause Mortality Risk in 222 497 Australian Adults. *Arch Intern Med* 2012;**172**(6):494-500.
6. Grøntved A, Hu FB. Television Viewing and Risk of Type 2 Diabetes, Cardiovascular Disease, and All-Cause Mortality. *JAMA* 2011;**305**(23):2448-55.
7. Joint Health Surveys Unit. The Health Survey for England 2008. Volume 1 Leeds, 2010:21-206.
8. Joint Health Surveys Unit. The Health Survey for England 2008, Volume 2. Leeds: , 2010:11.
9. Marmot MG, Shipley MJ, Hemingway H, et al. Biological and behavioural explanations of social inequalities in coronary heart disease: Whitehall II Study. *Diabetologia* 2008;**51**(11):1980-88.
10. Williams ED, Tapp RJ, Magliano DJ, et al. Health behaviours, socioeconomic status and diabetes incidence: the Australian Diabetes Obesity and Lifestyle Study (AusDiab). *Diabetologia* 2010;**53**:2538-45.
11. Stringhini S, Sabia S, Shipley M, et al. Association of Socioeconomic Position With Health Behaviors and Mortality. *JAMA* 2010;**303**(12):1159-66.
12. Stamatakis E, Hillsdon M, Mishra G, et al. Television viewing and other screen-based entertainment in relation to multiple socioeconomic status indicators and area deprivation: the Scottish Health Survey 2003. *Journal of epidemiology and community health* 2009;**63**(9):734-40.
13. Van Dyck D, Cardon G, Deforche B, et al. Socio-demographic, psychosocial and home-environmental attributes associated with adults' domestic screen time. *BMC Public Health* 2011;**11**:668.
14. Teychenne M, Ball K, Salmon J. Correlates of socio-economic inequalities in women's television viewing: a study of intrapersonal, social and environmental mediators. *Int J Behav Nutr Phy Act* 2012;**9**:3.
15. Burton NW, Haynes M, van Uffelen JGZ, et al. Mid-Aged Adults' Sitting Time in Three Contexts. *Am J Prev Med* 2012;**42**(4):363-73.
16. Bowman SA. Television-viewing characteristics of adults: correlations to eating practices and overweight and health status. *Preventing Chronic Disease* 2006;**3**(2).
17. Stamatakis E, Hamer M, Tilling K, et al. Sedentary time in relation to cardio-metabolic risk factors: differential associations for self-report vs accelerometry in working age adults. *Int J Epidemiol* 2012;**41**:1328-37.
18. Clark BK, Healy GN, Winkler EAH, et al. Relationship of Television Time with Accelerometer-Derived Sedentary Time: NHANES *Med Sci Sports Exerc* 2011;**43**(5):822-28.
19. van Uffelen JGZ, Heesch KC, Brown W. Correlates of Sitting Time in Working Age Australian Women: Who Should Be Targeted With Interventions to Decrease Sitting Time? *J Phys Act Health* 2012;**9**(2):270-87.
20. Santos R, Soares-Miranda L, Vale S, et al. Sitting time and body mass index, in a portuguese sample of men: Results from the azorean physical activity and health study (APAHS). *Int J Environ Res Publ Health* 2010;**7**(4):1500-07.
21. Duncan MJ, HBadland HM, Mummery WK. Physical Activity Levels by Occupational Category in Non-Metropolitan Australian Adults. *J Phys Act Health* 2010;**7**(6):718-23.

- 1  
2  
3 22. Matthews CE, Chen KY, Freedson PS, et al. Amount of time spent in sedentary behaviors in the  
4 united states, 2003-2004. *Am J Epidemiol* 2008;**167**(7):875-81.
- 5 23. Stamatakis E, Ekelund U, Wareham N. Temporal trends in physical activity in England. The Health  
6 Survey for England 1991 to 2004. . *Prev Med* 2007;**45**:416-23.
- 7 24. Stamatakis E, Chaudhury M. Temporal trends in adults' sports participation patterns in England  
8 between 1997 and 2006: the Health Survey Br *J Sports Med* 2008;**42**:601-08.
- 9 25. Scholes S, Coombs N, Pedisic Z, et al. Age- and sex-specific criterion validity of the health survey  
10 for England physical activity and sedentary behavior assessment questionnaire as compared  
11 with accelerometry. *Am J Epidemiol* 2014;**179**(12):1493-502.
- 12 26. Troiano RP, Berrigan D, Dodd KW, et al. Physical activity in the United States measured by  
13 accelerometer. *Med Sci Sports Exerc* 2008;**40**(1):181-8.
- 14 27. Gallo V, Egger M, McCormack V, et al. STrengthening the Reporting of OBservational studies in  
15 Epidemiology--Molecular Epidemiology (STROBE-ME): an extension of the STROBE  
16 Statement. *PLoS medicine* 2011;**8**(10):e1001117.
- 17 28. Jans M, Proper K, Hildebrandt V. Sedentary Behavior in Dutch Workers: Differences between  
18 Occupations and Business Sectors. *Am J Prev Med* 2007;**33**:450-54.
- 19 29. Stamatakis E, Grunseit AC, Coombs N, et al. Associations between socio-economic position and  
20 sedentary behaviour in a large population sample of Australian middle and older-aged  
21 adults: The Social, Economic, and Environmental Factor (SEEF) Study. *Prev Med* 2014;**63c**:72-  
22 80.
- 23 30. Rhodes RE, Mark RS, Temmel CP. Adult Sedentary Behavior A Systematic Review. *Am J Prev Med*  
24 2012;**42**(3):E3-E28.
- 25 31. Yates T, Wilmot EG, Khunti K, et al. Stand up for your health: Is it time to rethink the physical  
26 activity paradigm? *Diabetes Research and Clinical Practice* 2011;**93**(2):292-94.
- 27 32. Roth M, Mindell J. Who provides accelerometry data? Correlates of adherence to wearing an  
28 accelerometry motion sensor: the 2008 health survey for England. *J Phys Act Health*  
29 2013;**10**(1):70-78.
- 30 33. Goodman A, Guell C, Panter J, et al. Healthy travel and the socio-economic structure of car  
31 commuting in Cambridge, UK: A mixed-methods analysis. *Social Science & Medicine*  
32 2012;**74**(12):1929-38.
- 33  
34  
35  
36  
37  
38  
39  
40  
41  
42  
43  
44  
45  
46  
47  
48  
49  
50  
51  
52  
53  
54  
55  
56  
57  
58  
59  
60

## Figure Legends and footnotes

### Figure 1: Multivariate-adjusted average daily sedentary time by SEP score

Model 1: adjusted for age and sex; model 2: further adjustments for area deprivation, BM, limiting long standing illness, difficulty with usual activities, car ownership, drinking frequency, and smoking status; model 3: further adjustments for self-reported time spent in MVPA, accelerometry-measured MVPA time, and average accelerometer wear time on valid days. Models with accelerometer sedentary time as the outcome were also adjusted for average accelerometer wear time on valid days.

a Coefficients represent estimated marginal means from generalised linear models, with 95% confidence intervals. Linear trend p values were obtained from linear regression.

b SEP1 indicates most deprived, SEP 5 indicates least deprived

c Any paid work in the last four weeks.

### Figure 2: Multivariate-adjusted accelerometer-measured sedentary time by SEP Score for individuals stratified by employment status.

Model 1: adjusted for age and sex; model 2: further adjustments for area deprivation, BM, limiting long standing illness, difficulty with usual activities, car ownership, drinking frequency, and smoking status; model 3: further adjustments for self-reported time spent in MVPA, accelerometry-measured MVPA time, and average accelerometer wear time on valid days. Models with accelerometer sedentary time as the outcome were also adjusted for average accelerometer wear time on valid days.

a Coefficients represent estimated marginal means from generalised linear models, with 95% confidence intervals. Linear trend p values were obtained from linear regression.

b SEP1 indicates most deprived, SEP 5 indicates least deprived

c Any paid work in the last four weeks.

### Figure 3: Multivariate-adjusted average daily sedentary time by household income quartile

Model 1: adjusted for age and sex; model 2: further adjustments for area deprivation, BM, limiting long standing illness, difficulty with usual activities, car ownership, drinking frequency, and smoking status; model 3: further adjustments for self-reported time spent in MVPA, accelerometry-measured MVPA time, and average accelerometer wear time on valid days. Models with accelerometer sedentary time as the outcome were also adjusted for average accelerometer wear time on valid days.

a Coefficients represent estimated marginal means from generalised linear models, with 95% confidence intervals. Linear trend p values were obtained from linear regression.

b Q1 indicates lowest income quartile ( $\leq$ £13876), Q4 indicates the highest income quartile ( $\geq$ £39001).

### Figure 4: Multivariate-adjusted difference average daily sedentary time by highest qualification

Model 1: adjusted for age and sex; model 2: further adjustments for area deprivation, BM, limiting long standing illness, difficulty with usual activities, car ownership, drinking frequency, and smoking status; model 3: further adjustments for self-reported time spent in MVPA, accelerometry-measured MVPA time, and average



1  
2  
3 accelerometer wear time on valid days. Models with accelerometer sedentary time as the outcome were also  
4 adjusted for average accelerometer wear time on valid days.

5 a Coefficients represent estimated marginal means from generalised linear models, with 95% confidence  
6 intervals. Linear trend p values were obtained from linear regression.

7 b Education Level 1 represents NVQ1/CSE and NVQ2 GCE O Level equivalent; Level 2 represents

8 NVQ3/GCE A Level equivalent; Level 3 represents higher education below Degree and NVQ4/NVQ5/Degree  
9 or higher.  
10

11  
12 **Figure 5:** Multivariate-adjusted average daily sedentary time<sup>a</sup> by occupational social class.

13  
14  
15  
16 Model 1: adjusted for age and sex; model 2: further adjustments for area deprivation, BM, limiting long  
17 standing illness, difficulty with usual activities, car ownership, drinking frequency, and smoking status; model  
18 3: further adjustments for self-reported time spent in MVPA, accelerometry-measured MVPA time, and average  
19 accelerometer wear time on valid days. Models with accelerometer sedentary time as the outcome were also  
20 adjusted for average accelerometer wear time on valid days.

21 a Coefficients represent estimated marginal means from generalised linear models, with 95% confidence  
22 intervals. Linear trend p values were obtained from linear regression.  
23  
24

25 **Figure 6:** Multivariate-adjusted sedentary time by area deprivation quintile.

26  
27  
28 Model 1: adjusted for age and sex; model 2: further adjustments for area deprivation, BM, limiting long  
29 standing illness, difficulty with usual activities, car ownership, drinking frequency, and smoking status; model  
30 3: further adjustments for self-reported time spent in MVPA, accelerometry-measured MVPA time, and average  
31 accelerometer wear time on valid days. Models with accelerometer sedentary time as the outcome were also  
32 adjusted for average accelerometer wear time on valid days.

33 a Coefficients represent estimated marginal means from generalised linear models, with 95% confidence  
34 intervals. Linear trend p values were obtained from linear regression.

35 b Q1 indicates most deprived, Q5 indicates least deprived  
36  
37  
38  
39  
40  
41  
42  
43  
44  
45  
46  
47  
48  
49  
50  
51  
52  
53  
54  
55  
56  
57  
58  
59  
60

**Title:** Objectively-assessed and self-reported sedentary time in relation to multiple socioeconomic status indicators among adults in England

**Running title:** Sedentary time and socioeconomic status

**Authors:** Emmanuel Stamatakis<sup>1 2 3</sup>, Ngaire Coombs<sup>3 4</sup>, Alex Rowlands<sup>5</sup>, Nicola Shelton<sup>3</sup>, Melvyn Hillsdon<sup>6</sup>.

<sup>1 2 1</sup>[Charles Perkins Centre, University of Sydney, Australia](#)

<sup>1 2</sup>[Discipline of Exercise and Sport Sciences, Faculty of Health Sciences, University of Sydney, Sydney, Australia](#)

<sup>2</sup>~~[Charles Perkins Centre, University of Sydney, Australia](#)~~

<sup>3</sup>PARG (Physical Activity Research Group), Department of Epidemiology and Public Health, University College London, London, UK

<sup>4</sup>Department of Social Sciences, University of Southampton, UK

<sup>5</sup>Division of Health Sciences, University of South Australia, Australia

<sup>6</sup> Sport and Health Sciences, College of Life and Environmental Sciences, University of Exeter, UK

**Correspondence:** Emmanuel Stamatakis, Charles Perkins Centre, University of Sydney, Johns Hopkins Drive, Sydney, NSW 2050, Australia. Email: [emmanuel.stamatakis@sydney.edu.au](mailto:emmanuel.stamatakis@sydney.edu.au), Telephone: +61 293519668.

**Wordcount:**

Abstract: ~~242~~-~~245~~ words

Main text: ~~3455~~-~~3693~~ words

## Abstract

**Objectives:** To examine the associations between socioeconomic position (SEP) and multi-domain self-reported and objectively-assessed sedentary time (ST). **Design:** cross-sectional; **Setting:** general population households in England. **Participants:** 2289 adults aged 16-96 ~~years and over~~ who participated in the 2008 Health Survey for England. **Outcomes:** accelerometer-measured sedentary time, ~~and self-reported~~ television time, non-television leisure-time sitting and occupational sitting/standing. We examined multivariable associations between household income, social class, education, area deprivation each SEP indicator (including a 5-point composite SEP score computed by aggregating individual SEP indicators) and each ST indicator using generalised linear models. **Results:** Accelerometry-measured total ST and occupational sitting/standing were positively associated with SEP score and most of its constituent SEP indicators, while television time was negatively associated with SEP score and education level. Area-level deprivation was largely unrelated to ST. Those in the lowest composite SEP group spent 64 (95% CIs: 52 to 76) and 72 (48 to 98), fewer minutes/day in total ST and occupational sitting/standing compared to those in the top SEP group, and an additional 48 (35 to 60) minutes/day watching television ( $p < 0.001$  for linear trend). Stratified analyses showed that these associations between composite SEP score and total ST were evident only among participants who were in employment. **Conclusions:** Occupational sitting seems to drive the positive association between socioeconomic position and total sedentary time. Lower socioeconomic position is linked to higher TV viewing times. ~~TV viewing, but not overall sedentary time, may be a contributor to socioeconomic inequalities in health in England.~~

## Article summary

### *Strengths and limitations of this study:*

- First study of its kind to use objective sedentary behaviour measurements
- Broad range of self-reported sedentary behaviour types
- Broad set of socioeconomic status markers including are-level deprivation
- ~~The~~ This is main limitation is the cross-sectional design
- The occupational sedentary time question and accelerometry cannot differentiate between sitting and standing

## Keywords

Socioeconomic status; television; sedentary ~~behavior~~behaviour; inequality; physical activity; accelerometer;

## Introduction

Recent studies show that sedentary time (defined as an energy expenditure rate below 1.5 metabolic equivalents<sup>1</sup>, often characterised by activities involving sitting) is linked to increased all-cause<sup>2-5</sup> and cardiovascular<sup>2,3</sup> mortality risk independently of leisure-time physical activity participation. Television viewing, one of the most common sedentary time (ST) activities, has been specifically linked to all-cause and cardiovascular mortality and type 2 diabetes<sup>6</sup>. Objective data show that adults in England spend approximately nine to 10 hours a day being sedentary on average, out of which approximately 4 hours/day is TV watching<sup>7,8</sup>. Assuming that the average waking day lasts for 16 hrs, total sedentary time accounts for some 55-65% of total waking time. For working age adults a substantial proportion of total sedentary time takes place while at work, 56% of working English men and 50% of women report more than 5 hrs /day being sedentary while at work<sup>7</sup>.

Socioeconomic position (SEP) is a broad term that encompasses a range of characteristics, including occupational type and employment status, purchasing capacity and ownership, educational level and deprivation. Accordingly, there are several SEP indices each of which measures different aspects of social standing. Overall, SEP is a strong predictor of premature mortality and chronic disease occurrence including cardiovascular disease (CVD)<sup>9</sup> and diabetes<sup>10</sup> with individuals in lower SEP being considerably more likely to fall ill and die prematurely. Although there is no consensus on the origins of the socioeconomic gradient in health, one of the suggested pathways involves higher prevalence of poor health ~~behavior~~behaviours (e.g. physical inactivity and smoking) among lower socioeconomic groups<sup>11</sup>.

We have previously shown that lower SEP is linked consistently with increased TV viewing and other recreational screen time in Scottish adults<sup>12</sup>, a finding that has been confirmed by

1  
2  
3 studies in other countries such as Belgium<sup>12 13</sup>, Australia<sup>14 15</sup>, and the US<sup>16</sup> that used TV as a  
4  
5 proxy for ST. However, these findings are not necessarily generalizable to overall sedentary  
6  
7 or sitting time because TV viewing is a complex exposure that seems to be a poor index of  
8  
9 overall ST<sup>17</sup>. In a recent study comparing associations between TV time and objectively  
10  
11 measured sedentary time, associations were of fair magnitude, but were not consistent across  
12  
13 population sub-groups<sup>18</sup>. The results of the few studies that looked at overall (self-reported)  
14  
15 sitting in relation to SEP are inconsistent. Higher social position was linked to higher overall  
16  
17 sitting time among Australian women<sup>19</sup> but education level was unrelated to sitting time  
18  
19 among Portuguese adults<sup>20</sup>. Objective measuring methodologies such as accelerometers and  
20  
21 inclinometers can give more comprehensive and complete estimates of total sedentary  
22  
23 ~~behavior~~behaviour than partial self-reported indices such as TV viewing, or self-reported  
24  
25 total sitting time, which may be more difficult to recall than TV viewing and therefore be  
26  
27 subject to more measurement error. Besides, SEP characteristics that relate to occupational  
28  
29 class and income will naturally have an impact on work time sitting. For example, manual  
30  
31 unskilled workers normally spend less time sitting during work than professionals in  
32  
33 managerial office-based jobs<sup>21</sup>. Similarly, higher incomes and the associated spending  
34  
35 capacity might impact on the time spent sitting driving a car or commuting. To our  
36  
37 knowledge, no study has looked at the associations between SEP defined using education,  
38  
39 occupational class, income and area deprivation indices, and SB estimated using self-reported  
40  
41 sitting across different domains as well as objective methods.  
42  
43  
44  
45  
46  
47

48 The aim of this study was to look at the associations between multiple SEP indicators and  
49  
50 self-reported indices of sitting time and SB as well as objectively-assessed total SB time. We  
51  
52 used data from one of the largest European accelerometry general population studies, the  
53  
54 2008 Health Survey for England.  
55

## 56 57 58 **Methods** 59 60

### *Study Sample*

The Health Survey for England (HSE) is a repeated nationally representative study of individuals living in private households in England. We drew our sample from the 2008 HSE which had a special focus on physical activity and sedentary ~~behavior~~behaviour. The sample is drawn using multi-stage stratified probability sampling with postcode sectors as the primary sampling unit. More details of the sample design are available elsewhere<sup>8</sup>. The overall interview household response rate for the main sample of 15,102 adults was 64% ~~for the main sample~~, and for the accelerometer sub-sample of 4,507 adults was 73% for the accelerometer sub-sample<sup>8</sup>. ~~We~~In this analysis we included adults aged 16 and over (age range 16-96 years) who had both valid accelerometry and self-reported SB data. Participants provided written informed consent. An abridged methods section is presented here: the full methods section with more information can be found in supplementary file S1 (Unabridged Methods). Ethical approval was obtained from the Oxford Research Ethics Committee (reference number 07/H0604/102).

### *Demographics and contextual variables*

Trained fieldworkers assessed participants' demographics, self-rated health, long standing illness, alcohol consumption and smoking using Computer Assisted Personal Interviewing.

Height was measured using a standard stadiometer with a sliding head plate, a base plate and three connecting rods marked with a metric measuring scale. Participants were asked to remove their shoes. One measurement was taken, with the participant stretching to the maximum height. Weight was measured using Tanita electronic scales with a digital display (Tanita Corporation, Japan). Participants were asked to remove their shoes and any bulky clothing and a single measurement was recorded to the nearest 100g. Height and weight were

1  
2  
3 | ~~measured by the same fieldworkers using standard protocols that have been described in~~  
4  
5 | ~~detail elsewhere.~~<sup>7</sup> -Body mass index (BMI) was computed as weight (kilograms) divided by  
6  
7 squared height (metres).  
8  
9

### 10 | *Socioeconomic position measures*

11  
12  
13 | Social class (of the household reference person) was determined by asking questions on  
14  
15 | participants' occupation and using the Registrar General's classification ~~and was~~ grouped  
16  
17 | them as I&II (professional and managerial/technical), III Non-manual, III manual, IV&V  
18  
19 | (semi-skilled manual and unskilled manual). Equivalised household income was grouped  
20  
21 | into quintiles. Highest education qualification was coded as no qualification and three levels:  
22  
23 | Level 1 represents secondary school or below (NVQ1/CSE and NVQ2/GCE O Level  
24  
25 | equivalent); Level 2 represents post-compulsory secondary school (NVQ3/GCE A Level  
26  
27 | equivalent) and Level 3 represents higher education (higher education below Degree and  
28  
29 | NVQ4/NVQ5/Degree or higher). Area deprivation was assessed using the 2004 Index of  
30  
31 | Multiple Deprivation (IMD), a continuous score that we grouped into quintiles (1  
32  
33 | representing the most deprived quintile, and 5 representing the least deprived).  
34  
35  
36  
37  
38  
39  
40

### 41 | *Sedentary time and physical activity measures*

42  
43  
44  
45 | A random sub-sample of HSE 2008 participants were selected to wear a uniaxial  
46  
47 | accelerometer (Actigraph model GT1M, Pensacola, Florida) during waking hours for seven  
48  
49 | consecutive days. Consistent with previous epidemiological SB studies<sup>22</sup>, the sampling  
50  
51 | epoch was one minute and non-wear time was defined as periods of at least 60 consecutive  
52  
53 | minutes of zero minutely counts, with allowance for up to 2 consecutive minutes of 1–100  
54  
55 | counts/minute. For a day to be 'valid' for inclusion in the analyses, participants had to have  
56  
57  
58  
59  
60



worn the accelerometer for a minimum of 600 minutes. Participants with at least one day of valid wear were included in these analyses.<sup>22</sup>

SR-Self-reported sedentary time was assessed using a set of questions on the usual week/weekend day time in the last four weeks prior to the interview time spent on: a) TV (including DVDs and videos) viewing; and b) any other sitting during non-work times, including reading and computer use. For those participants who were economically active another set of questions assessed the average daily times spent sitting or standing while at work<sup>17</sup>. While it is not ideal to include standing as a measure of sedentary time, it is often necessitated by the unavailability of sitting-specific data, and standing is routinely included in objectively measured sedentary data as accelerometers are unable to differentiate between time spent sitting or standing. Like previously<sup>17</sup> for the purposes of this study standing will be considered a measure of sedentary ~~behavior~~behaviour.

Physical activity questions included frequency (number of days in the last 4 weeks) and duration (minutes per day) of participation in walking for any purpose, domestic physical activity<sup>12,23</sup>, and any recreational sports and exercise including cycling for any purpose<sup>24</sup>.

Both the physical activity and the SB questions have been validated against accelerometry.<sup>25</sup>

### ***Data handling/Statistical analysis***

#### *Regrouping the Socioeconomic position variables*

Due to small numbers of observations, the top and bottom two categories of social class were collapsed, resulting in four categories: unskilled /semi-skilled manual; skilled manual; skilled non-manual; and managerial/technical/ professional. Using existing methods<sup>12</sup>, we derived a composite Socioeconomic Position (SEP) score using household income, individual education, and occupational social class of the head of household. The lowest category of each component variable was assigned a SEP score of 0, with the highest category given a

1  
2  
3 SEP score of 4. The scores for each individual SEP indicator were then aggregated, resulting  
4  
5 in a SEP score ranging from 0 to 12. Due to small numbers of observations in the high end of  
6  
7 the score, the top SEP score was collapsed into five categories of comparable sample size:  
8  
9 SEP1 consisted of the lowest two SEP categories (0 and 1), SEP2 comprised categories 2 and  
10  
11 3, SEP3 comprised categories 4 and 5, SEP4 comprised categories 6 and 7, and SEP5  
12  
13 comprised of categories 8 and 9 (the highest observed SEP category).  
14  
15

#### 16 17 *Deriving sedentary time and physical activity variables*

18  
19  
20 Week- and weekend day-specific TV and non-TV leisure time sitting were converted to all-  
21  
22 week time (minutes) using the following formula: (weekday time × 5) + (weekend day time ×  
23  
24 2) / 7. Occupational sitting/standing time (minutes) per day was calculated by multiplying the  
25  
26 number of days worked per week by the average time spent sitting/standing at work on a  
27  
28 work day, and dividing by 7. Weekly self-reported MVPA hours/week were calculated as  
29  
30 number of days of participation multiplied by time per day in each activity type<sup>7 8</sup> Due to the  
31  
32 large number of participants and the very skewed distribution, self-reported MVPA was  
33  
34 categorised in to none, less than 30 minutes, 30 minutes to 1 hour, 1 to 2 hours, and more  
35  
36 than 2 hours of MVPA per day. For the accelerometry data we used 0-99 counts/minute to  
37  
38 denote sedentary (<1.5 MET)<sup>3</sup> and ≥2,020 counts/minute to denote MVPA (>3 MET)<sup>26</sup>.  
39  
40 Accelerometry-measured variables were converted to time (minutes) per valid day.  
41  
42  
43  
44  
45  
46  
47

#### 48 *Missing data and multiple imputation*

49  
50 Outliers outside 3 standard deviations of the mean for all continuous variables apart from age  
51  
52 were removed from the analyses to improve normality. This excluded 1.3% to 2.2% of cases  
53  
54 from each continuous variable. Due to a substantial proportion of cases with at least one  
55  
56 missing value in at least one covariable or exposure variable (22% to 28% depending on the  
57  
58  
59  
60

1  
2  
3 exposure variable) we performed multiple imputation. IBM SPSS v20 was used to conduct  
4  
5 the multiple imputation, missing values were imputed for all covariables and exposures, with  
6  
7 observed maximum and minimum values used as constraints. Outcome variables did not have  
8  
9 missing values imputed, but were included in the imputation models to predict missing values  
10  
11 in other variables. Linear regression was used as the type of imputation, and 5 cycles of  
12  
13 imputation were conducted resulting in 5 imputed datasets. Results from these 5 datasets  
14  
15 were combined using the multiple imputation module in SPSS to provide pooled results. The  
16  
17 imputed sample size is limited to the number of valid observations for each outcome variable  
18  
19 (2289 for accelerometry-measured ST, 2279 for TV time, 2253 for non-TV sitting time, and  
20  
21 1170 for occupational sitting time). Non-imputed results are presented in the appendix.  
22  
23  
24  
25  
26

### 27 *Statistical analysis*

28  
29  
30 Analyses were weighted for non-response to give a sample that was representative of adults  
31  
32 living in England. The associations between each of the socioeconomic indicators  
33  
34 (household income, social class, education, SEP score, and area deprivation,) and each  
35  
36 individual ST indicator (TV time, non-TV sitting time, occupational sitting/standing, and  
37  
38 accelerometry-measured ST) were examined using generalised linear models, and by multiple  
39  
40 linear regression to determine linear trend p values. Results are presented for the whole week,  
41  
42 the weekday/weekend day-specific results can be found in the online appendix. We also  
43  
44 repeated the SEP score analyses stratified by economic activity (employed/self-employed vs  
45  
46 non-economically active). SPSS version 21 was used for all analyses. For all multivariate  
47  
48 analyses we used the complex samples generalised linear models (GLM) procedure to take  
49  
50 into account the complex survey design. Different models were adjusted for: 1) age and sex;  
51  
52 2) additionally for BMI, limiting long standing illness, difficulty with usual activities, car  
53  
54 ownership, drinking frequency, smoking status, and other socioeconomic indicators  
55  
56  
57  
58  
59  
60

1  
2  
3 (household income, social class, area deprivation); 3) additionally for time spent in self-  
4 reported MVPA or accelerometry-measured MVPA as appropriate, and average  
5  
6  
7 accelerometer wear time on valid days. Models 2 and 3 with accelerometry-measured ST as  
8  
9 the outcome were also adjusted for average accelerometer wear time on each valid day. This  
10  
11 work conforms with the STROBE statement for observational studies.<sup>27</sup>  
12  
13

## 14 15 16 17 **Results**

### 18 19 *Descriptives*

20  
21  
22  
23 2289 adults ([1030 males](#)) provided valid accelerometry data, with ~~227679~~ ([1020 males](#))~~2279~~  
24 and 2253 ([1014 males](#)) also providing self-reported TV and non-TV time respectively. 1170  
25  
26 ([576 males](#)) provided occupational sitting/standing time. Table 1 presents the sample  
27  
28 characteristics of the accelerometry sample by SEP score group (prior to MI) with casewise  
29  
30 deletion of missing values (N=1651). In total 628 participants in the accelerometry sample  
31  
32 had at least one covariate imputed. The variables with the most imputed values were  
33  
34 household income (361 imputed) and BMI (233 imputed). Participants from lower SEP  
35  
36 groups were more likely to be female, older, have a higher BMI, spend less time sedentary  
37  
38 overall and sitting at work, but spend more time watching TV than individuals in higher SEP  
39  
40 groups. Lower SEP individuals were also more likely to report a limiting longstanding illness  
41  
42 and difficulties with usual daily activities, and be a current cigarette smoker, but less likely to  
43  
44 be a heavy drinker and meet physical activity guidelines. The mean wear time on valid days  
45  
46 was 831 minutes. The mean number of valid days (for those with at least 1 valid day) was  
47  
48 6.0 days.  
49  
50  
51  
52  
53  
54  
55  
56  
57  
58  
59  
60

**Table 1:** Sample Characteristics by Socioeconomic Position Score

|                                                                        | SEP Score Group            |                       |                             | <i>p</i>           |
|------------------------------------------------------------------------|----------------------------|-----------------------|-----------------------------|--------------------|
|                                                                        | 1 (lowest) & 2<br>(N=521)* | 3<br>(N=355)*         | 4 & 5 (highest)<br>(N=775)* |                    |
| <i>Categorical variables<sup>a</sup></i>                               |                            |                       |                             |                    |
| Sex (% male)                                                           | 40.1                       | 47.0                  | 50.5                        | 0.001              |
| Limiting longstanding illness (%)                                      | 32.8                       | 24.5                  | 16.8                        | <0.001             |
| Adherence to the physical activity guidelines (self-reported data) (%) | 32.6                       | 43.9                  | 49.6                        | <0.001             |
| Difficulty in performing usual activities (%)                          | 21.5                       | 14.9                  | 7.8                         | <0.001             |
| Car or van available (%)                                               | 73.9                       | 89.9                  | 94.7                        | <0.001             |
| Drinking frequency (% ≥5 times /week)                                  | 15.9                       | 23.1                  | 24.9                        | <0.001             |
| Smoking (% current)                                                    | 27.1                       | 23.9                  | 15.5                        | <0.001             |
| Employment status (% employed/self-employed)                           | 35.2                       | 64.8                  | 76.3                        | <0.001             |
| <i>Continuous variables<sup>b</sup></i>                                |                            |                       |                             |                    |
| Age (years)                                                            | M (SD)<br>56.1 (18.5)      | M (SD)<br>50.4 (16.6) | M (SD)<br>46.9 (15.9)       | <i>P</i><br><0.001 |
| BMI (kg/m <sup>2</sup> )                                               | 28.0 (4.9)                 | 27.4 (4.9)            | 26.8 (4.5)                  | <0.001             |
| Sedentary time (accelerometry data) (Minutes/day)                      | 505.6 (97.7)               | 499.4 (90.7)          | 528.7 (87.2)                | <0.001             |
| TV (Minutes/day)                                                       | 218.6 (117.3)              | 175.8 (97.7)          | 145.0 (74.7)                | <0.001             |
| Non-TV sitting time (Minutes/day)                                      | 128.1 (86.4)               | 121.5 (90.6)          | 133.2 (86.3)                | 0.110              |
| Occupational sitting/standing time (Minutes/day)                       | 151.8 (116.5)              | 173.5 (120.9)         | 198.1 (121.9)               | <0.001             |
| MVPA time per day (accelerometry data) (Minutes/day)                   | 24.7 (24.1)                | 29.7 (26.3)           | 32.0 (25.1)                 | <0.001             |

\* Occupational sitting time SEP 1 N=152 SEP 2 N=214; SEP 3 N=549 for SEP 4 & 5

<sup>a</sup> Chi Square was used to test significance of association between categorical variables and social class

<sup>b</sup> Anova was used to test significance of association between continuous variables and social class

### *Composite Socioeconomic position and sedentary time*

Figure 1 presents the GLM estimated marginal means and their 95% CIs describing the associations between composite SEP score and each measure of ST. SEP was positively associated with accelerometry-measured ST and occupational sitting/standing time, and inversely associated with TV time in all models. There were no associations between SEP and non-TV sitting time. Adjustments for potential confounders made no material difference to all above associations. Figure 2 presents associations between SEP score and accelerometry-measured ST, stratified by employment status. SEP score was positively associated with accelerometry-measured ST for those in employment only. SEP was inversely associated with TV time regardless of employment status, while non-TV leisure-time sitting was positively associated with SEP (SEP1 coefficient 134, 95% CI 125 to 145; SEP5 coefficient 177, 155 to 198), but only for those not in employment. However this association was not linear (data not shown).

### *Equivalised Household income and sedentary time*

Figure 3 presents associations between household income and each measure of ST. Household income was positively associated with accelerometer-measured ST and occupational sitting time and these associations persisted following adjustments for MVPA and other confounders. Like with SEP score, household income was inversely associated with TV time, although this association was attenuated to the null following adjustments for potential confounders in models 2 and 3. Household income was not associated with non-TV sitting time.

### *Educational attainment and sedentary time*

1  
2  
3 Figure 4 presents the associations between the highest educational qualification and each  
4  
5 measure of ST. Educational attainment was positively associated with accelerometry-  
6  
7 measured ST and inversely associated with TV time in all models. Occupational  
8  
9 sitting/standing time was inversely associated with education but the association did not  
10  
11 appear to be linear (it was evident across the lowest three educational levels only) and was  
12  
13 attenuated to the null following adjustments for potential confounders. There was a weak  
14  
15 positive association between education and non-TV sitting time, following adjustments for  
16  
17 potential confounders in models 2 and 3.  
18  
19

#### 20 21 *Occupational social class and sedentary time*

22  
23  
24 As shown in Figure 5, occupational social class was positively associated with  
25  
26 accelerometry-measured ST and occupational sitting/standing. The initial inverse association  
27  
28 with TV time (model 1) was attenuated to the null following adjustments for potential  
29  
30 confounders. Similarly to SEP score and income, social class was not associated with non-  
31  
32 TV sitting time.  
33  
34

#### 35 36 *Area deprivation and sedentary time*

37  
38  
39 Area-level deprivation was positively associated with TV time (the lower the deprivation the  
40  
41 lower the TV time) but these associations did not persist in the adjusted models (Figure 6).  
42  
43 Area deprivation was not associated with any other measures of ST (Figure 6).  
44  
45

#### 46 47 *Differential associations between imputed and non-imputed data*

48  
49  
50 There were no differences between the imputed and non-imputed models describing the  
51  
52 associations between SEP score and ST indicators, although the 95% confidence intervals  
53  
54 were slightly broader in the unimputed models due to the lower sample size (see  
55  
56 supplementary Figure S2).  
57  
58  
59  
60

### *Differential associations in weekday Vs weekend days*

There was no consistent pattern of differences in the associations of SEP and ST by weekend vs weekday (see supplementary Figures S3 and S4), time of the week-specific results showed broadly the same pattern as the whole week. The only notable difference was that a direct association between SEP and non-TV sitting time was observed on weekend days, but not on weekdays.

### **Discussion**

Literature on the socio-economic gradient of sedentary ~~behavior~~behaviour is very limited and has relied on partial sedentary ~~behavior~~behaviour indicators, mostly TV viewing. To our knowledge, this study is the only one that considers four indicators of socioeconomic position in relation to four indicators of sedentary ~~behavior~~behaviour, allowing a much more in-depth examination of the associations of interest than in previous studies. Our study suggests that occupational ST is what drives the positive association between overall SEP and total ST as there was no association among those not in employment (Figure 2). The difference between the lowest and highest SEP groups (Figure 1) is in the region of 60-70 minutes per day for both total accelerometry-measured sedentary time and occupational sitting/standing time and this is comparable with the difference between the extreme SEP group among the economically active part of the sample (~90 minutes/day). Our findings agree with an Australian study<sup>19</sup> which found that among women, full-time work, skilled occupations, and university education were all associated with high (self-reported) total sitting time. Our study also found that the inverse association between TV time and SEP was significant regardless of employment status. In a study of Dutch workers, sitting time at work varied considerably by type of occupation but not sitting during leisure time<sup>28</sup>.



1  
2  
3 Previous studies of adults in Belgium<sup>13</sup> and Australia<sup>14 15 29</sup> have reported inverse  
4  
5 associations between SEP indicators and TV time. We observed the same TV time pattern  
6  
7 with SEP score and education but not with occupational class, household income or area  
8  
9 deprivation. Although the occupational class and household income data were suggestive of  
10  
11 a weak association with TV time, our current results somehow contradict our study in  
12  
13 Scottish adults,<sup>12</sup> where all SEP indicators (occupational class, household income or area  
14  
15 deprivation) as well as the composite SEP score were associated with recreational screen time  
16  
17 (including TV time). Explanations for this might be that the Scottish study was three times  
18  
19 larger in size (which might have made it easier for data patterns to emerge) and the inclusion  
20  
21 of non-TV screen time as an outcome, although studies from other countries suggest no clear  
22  
23 pattern between non-TV recreational screen time (e.g. computer use) and SEP<sup>30 15</sup>.  
24  
25  
26 Nevertheless, both our English and the Scottish studies demonstrate that when education,  
27  
28 occupational social class and income are combined into a single measure (SEP score) they are  
29  
30 a much more powerful predictor of sedentary time than any single indicator, perhaps because  
31  
32 they collectively capture actual socioeconomic position more thoroughly than any single  
33  
34 indicator. Composite SEP score showed a clear and consistent pattern with all ST outcomes,  
35  
36 although each of the individual/household-level SEP indicators seemed to influence each ST  
37  
38 outcome in various ways, suggesting there are complex, interacting, multi-dimensional  
39  
40 influences of SEP on ST. Accelerometry-measured ST was the only sedentary  
41  
42 ~~behavior~~behaviour variable that showed clear and consistent (positive) associations with all  
43  
44 SEP variables (except from area-level deprivation). Although the cross-sectional design of  
45  
46 this study precludes causal inferences, the pattern of the ~~accelerometry-based~~ associations we  
47  
48 observed suggests that it is unlikely that total sedentary ~~behavior~~behaviour contributes to the  
49  
50 well-documented<sup>14</sup> socioeconomic inequalities in health.<sup>11</sup>  
51  
52  
53  
54  
55  
56  
57  
58  
59  
60

1  
2  
3 Strengths of our study include the availability of both objectively-measured and self-reported  
4 indicators of sedentary ~~behavior~~behaviour which allowed us to be more thorough and detailed  
5  
6  
7 when examining the associations of interest. Accelerometers can capture total sedentary time  
8  
9 more comprehensively than any partial self-reported indicator and as such are able to better  
10 quantify the socioeconomic gradient of ST as a contributor to health inequalities, however a  
11 limitation is that accelerometers do not distinguish between sitting and standing which have  
12 different health implications, this also applies to occupational sitting/standing time. It has  
13  
14 been argued that standing should not be considered a sedentary ~~behavior~~behaviour<sup>31</sup>. This  
15  
16 limitation is also pertinent to the self-reported ST assessment as standing time was included  
17  
18 in the occupational ST question. Taken together, these limitations of the measurements may,  
19  
20 to some extent, have confounded the associations of SEP with total and occupational ST we  
21  
22 reported. Another limitation is that our study was limited to the accelerometry sample of  
23  
24 HSE 2008 and this might have led to our sample being less representative of the target  
25  
26 population. Although those in the subsample offered the accelerometer were older and more  
27  
28 likely to be retired and to be less healthy than the rest of the adult Health Survey for England  
29  
30 sample, those who refused to wear an accelerometer were similar in terms of employment  
31  
32 status and area-level deprivation compared to those who wore the accelerometers for at least  
33  
34 four days a week<sup>32</sup>. Higher SEP is linked to higher commuting by car<sup>33</sup> and this may partly  
35  
36 explain the socioeconomic gradient but our data are limited in that there was no specific  
37  
38 question on commuting-related sitting to examine this explanation.  
39  
40  
41  
42  
43  
44  
45  
46  
47  
48  
49  
50

## 51 Conclusions

52  
53  
54 Objectively-measured total sedentary time and occupational sedentary time are higher among  
55  
56 economically active English adults in higher socioeconomic groups compared to less  
57  
58  
59  
60

1  
2  
3 privileged groups. However, TV viewing is lower in higher socioeconomic groups regardless  
4  
5 of economic activity. Combining different socioeconomic indicators appears to have  
6  
7 composite power as a predictor of sedentary time. ~~Although the cross-sectional design of this~~  
8  
9 ~~study precludes causal inferences, the pattern of the associations we observed suggests that it~~  
10  
11 ~~is unlikely that total sedentary behavior contributes to socioeconomic inequalities in health.~~  
12  
13  
14  
15

16  
17  
18 **Funding:** This work was funded by the National Institute for Health Research through a Career  
19  
20 Development Fellowship (ES). NC is also funded by the National Institute for Health Research  
21  
22 through the same source. The views expressed in this article are those of the authors and not the  
23  
24 English Department of Health or the National Institute for Health Research.  
25

26  
27 **Data Sharing:** No additional data are available  
28

29  
30 **Competing interests:** None of the authors have any competing interests to declare  
31

32  
33 **Authors' Contributions:** All authors have contributed sufficiently, ES conceived the idea, prepared  
34  
35 the dataset, drafted most of the manuscript and revised the manuscript several times. NC did the  
36  
37 statistical analysis under the supervision of ES and prepared the Tables, Figures and Supplemental  
38  
39 Online material. AR processed the accelerometry files. NS, MH and AR redrafted parts of the  
40  
41 manuscript and critically evaluated the whole material. All authors approved the final version before  
42  
43 submission.  
44  
45  
46  
47  
48  
49  
50  
51  
52  
53  
54  
55  
56  
57  
58  
59  
60

## References

1. Pate RR, O'Neill JR, Lobelo F. The evolving definition of "sedentary". *Exercise and Sport Sciences Reviews* 2008;**36**(4):173-78.
2. Katzmarzyk PT, Church TS, Craig CL, et al. Sitting Time and Mortality from All Causes, Cardiovascular Disease, and Cancer. *Med Sci Sports Exerc* 2009;**41**(5):998-1005.
3. Matthews C, George SM, Moore SC, et al. Amount of time spent in sedentary behaviors and cause-specific mortality in US adults. *Am J Clin Nutr* 2012;**95**(2):437-45.
4. Patel AV, Bernstein L, Deka A, et al. Leisure Time Spent Sitting in Relation to Total Mortality in a Prospective Cohort of US Adults. *Am J Epidemiol* 2010;**172**(4):419-29.
5. van der Ploeg HP, Chey T, Korda RJ, et al. Sitting Time and All-Cause Mortality Risk in 222 497 Australian Adults. *Arch Intern Med* 2012;**172**(6):494-500.
6. Grøntved A, Hu FB. Television Viewing and Risk of Type 2 Diabetes, Cardiovascular Disease, and All-Cause Mortality. *JAMA* 2011;**305**(23):2448-55.
7. Joint Health Surveys Unit. The Health Survey for England 2008. Volume 1 Leeds, 2010:21-206.
8. Joint Health Surveys Unit. The Health Survey for England 2008, Volume 2. Leeds: , 2010:11.
9. Marmot MG, Shipley MJ, Hemingway H, et al. Biological and behavioural explanations of social inequalities in coronary heart disease: Whitehall II Study. *Diabetologia* 2008;**51**(11):1980-88.
10. Williams ED, Tapp RJ, Magliano DJ, et al. Health behaviours, socioeconomic status and diabetes incidence: the Australian Diabetes Obesity and Lifestyle Study (AusDiab). *Diabetologia* 2010;**53**:2538-45.
11. Stringhini S, Sabia S, Shipley M, et al. Association of Socioeconomic Position With Health Behaviors and Mortality. *JAMA* 2010;**303**(12):1159-66.
12. Stamatakis E, Hillsdon M, Mishra G, et al. Television viewing and other screen-based entertainment in relation to multiple socioeconomic status indicators and area deprivation: the Scottish Health Survey 2003. *Journal of epidemiology and community health* 2009;**63**(9):734-40.
13. Van Dyck D, Cardon G, Deforche B, et al. Socio-demographic, psychosocial and home-environmental attributes associated with adults' domestic screen time. *BMC Public Health* 2011;**11**:668.
14. Teychenne M, Ball K, Salmon J. Correlates of socio-economic inequalities in women's television viewing: a study of intrapersonal, social and environmental mediators. *Int J Behav Nutr Phy Act* 2012;**9**:3.
15. Burton NW, Haynes M, van Uffelen JGZ, et al. Mid-Aged Adults' Sitting Time in Three Contexts. *Am J Prev Med* 2012;**42**(4):363-73.
16. Bowman SA. Television-viewing characteristics of adults: correlations to eating practices and overweight and health status. *Preventing Chronic Disease* 2006;**3**(2).
17. Stamatakis E, Hamer M, Tilling K, et al. Sedentary time in relation to cardio-metabolic risk factors: differential associations for self-report vs accelerometry in working age adults. *Int J Epidemiol* 2012;**41**:1328-37.
18. Clark BK, Healy GN, Winkler EAH, et al. Relationship of Television Time with Accelerometer-Derived Sedentary Time: NHANES *Med Sci Sports Exerc* 2011;**43**(5):822-28.
19. van Uffelen JGZ, Heesch KC, Brown W. Correlates of Sitting Time in Working Age Australian Women: Who Should Be Targeted With Interventions to Decrease Sitting Time? *J Phys Act Health* 2012;**9**(2):270-87.
20. Santos R, Soares-Miranda L, Vale S, et al. Sitting time and body mass index, in a portuguese sample of men: Results from the azorean physical activity and health study (APAHS). *Int J Environ Res Publ Health* 2010;**7**(4):1500-07.
21. Duncan MJ, HBadland HM, Mummery WK. Physical Activity Levels by Occupational Category in Non-Metropolitan Australian Adults. *J Phys Act Health* 2010;**7**(6):718-23.

- 1  
2  
3 22. Matthews CE, Chen KY, Freedson PS, et al. Amount of time spent in sedentary behaviors in the  
4 united states, 2003-2004. *Am J Epidemiol* 2008;**167**(7):875-81.  
5 23. Stamatakis E, Ekelund U, Wareham N. Temporal trends in physical activity in England. The Health  
6 Survey for England 1991 to 2004. . *Prev Med* 2007;**45**:416-23.  
7 24. Stamatakis E, Chaudhury M. Temporal trends in adults' sports participation patterns in England  
8 between 1997 and 2006: the Health Survey Br *J Sports Med* 2008;**42**:601-08.  
9 25. Scholes S, Coombs N, Pedisic Z, et al. Age- and sex-specific criterion validity of the health survey  
10 for England physical activity and sedentary behavior assessment questionnaire as compared  
11 with accelerometry. *Am J Epidemiol* 2014;**179**(12):1493-502.  
12 26. Troiano RP, Berrigan D, Dodd KW, et al. Physical activity in the United States measured by  
13 accelerometer. *Med Sci Sports Exerc* 2008;**40**(1):181-8.  
14 27. Gallo V, Egger M, McCormack V, et al. STrengthening the Reporting of OBservational studies in  
15 Epidemiology--Molecular Epidemiology (STROBE-ME): an extension of the STROBE  
16 Statement. *PLoS medicine* 2011;**8**(10):e1001117.  
17 28. Jans M, Proper K, Hildebrandt V. Sedentary Behavior in Dutch Workers: Differences between  
18 Occupations and Business Sectors. *Am J Prev Med* 2007;**33**:450-54.  
19 29. Stamatakis E, Grunseit AC, Coombs N, et al. Associations between socio-economic position and  
20 sedentary behaviour in a large population sample of Australian middle and older-aged  
21 adults: The Social, Economic, and Environmental Factor (SEEF) Study. *Prev Med* 2014;**63c**:72-  
22 80.  
23 30. Rhodes RE, Mark RS, Temmel CP. Adult Sedentary Behavior A Systematic Review. *Am J Prev Med*  
24 2012;**42**(3):E3-E28.  
25 31. Yates T, Wilmot EG, Khunti K, et al. Stand up for your health: Is it time to rethink the physical  
26 activity paradigm? *Diabetes Research and Clinical Practice* 2011;**93**(2):292-94.  
27 32. Roth M, Mindell J. Who provides accelerometry data? Correlates of adherence to wearing an  
28 accelerometry motion sensor: the 2008 health survey for England. *J Phys Act Health*  
29 2013;**10**(1):70-78.  
30 33. Goodman A, Guell C, Panter J, et al. Healthy travel and the socio-economic structure of car  
31 commuting in Cambridge, UK: A mixed-methods analysis. *Social Science & Medicine*  
32 2012;**74**(12):1929-38.  
33  
34  
35  
36  
37  
38  
39  
40  
41  
42  
43  
44  
45  
46  
47  
48  
49  
50  
51  
52  
53  
54  
55  
56  
57  
58  
59  
60

## Figure Legends and footnotes

### Figure 1: Multivariate-adjusted average daily sedentary time by SEP score

Model 1: adjusted for age and sex; model 2: further adjustments for area deprivation, BM, limiting long standing illness, difficulty with usual activities, car ownership, drinking frequency, and smoking status; model 3: further adjustments for self-reported time spent in MVPA, accelerometry-measured MVPA time, and average accelerometer wear time on valid days. Models with accelerometer sedentary time as the outcome were also adjusted for average accelerometer wear time on valid days.

a Coefficients represent estimated marginal means from generalised linear models, with 95% confidence intervals. Linear trend p values were obtained from linear regression.

b SEP1 indicates most deprived, SEP 5 indicates least deprived

c Any paid work in the last four weeks.

### Figure 2: Multivariate-adjusted accelerometer-measured sedentary time by SEP Score for individuals stratified by employment status.

Model 1: adjusted for age and sex; model 2: further adjustments for area deprivation, BM, limiting long standing illness, difficulty with usual activities, car ownership, drinking frequency, and smoking status; model 3: further adjustments for self-reported time spent in MVPA, accelerometry-measured MVPA time, and average accelerometer wear time on valid days. Models with accelerometer sedentary time as the outcome were also adjusted for average accelerometer wear time on valid days.

a Coefficients represent estimated marginal means from generalised linear models, with 95% confidence intervals. Linear trend p values were obtained from linear regression.

b SEP1 indicates most deprived, SEP 5 indicates least deprived

c Any paid work in the last four weeks.

### Figure 3: Multivariate-adjusted average daily sedentary time by household income quartile

Model 1: adjusted for age and sex; model 2: further adjustments for area deprivation, BM, limiting long standing illness, difficulty with usual activities, car ownership, drinking frequency, and smoking status; model 3: further adjustments for self-reported time spent in MVPA, accelerometry-measured MVPA time, and average accelerometer wear time on valid days. Models with accelerometer sedentary time as the outcome were also adjusted for average accelerometer wear time on valid days.

a Coefficients represent estimated marginal means from generalised linear models, with 95% confidence intervals. Linear trend p values were obtained from linear regression.

b Q1 indicates lowest income quartile ( $\leq$ £13876), Q4 indicates the highest income quartile ( $\geq$ £39001).

### Figure 4: Multivariate-adjusted difference average daily sedentary time by highest qualification

Model 1: adjusted for age and sex; model 2: further adjustments for area deprivation, BM, limiting long standing illness, difficulty with usual activities, car ownership, drinking frequency, and smoking status; model 3: further adjustments for self-reported time spent in MVPA, accelerometry-measured MVPA time, and average

1  
2  
3 accelerometer wear time on valid days. Models with accelerometer sedentary time as the outcome were also  
4 adjusted for average accelerometer wear time on valid days.

5 a Coefficients represent estimated marginal means from generalised linear models, with 95% confidence  
6 intervals. Linear trend p values were obtained from linear regression.

7 b Education Level 1 represents NVQ1/CSE and NVQ2 GCE O Level equivalent; Level 2 represents

8 NVQ3/GCE A Level equivalent; Level 3 represents higher education below Degree and NVQ4/NVQ5/Degree

9  
10 or higher.

11  
12  
13 **Figure 5:** Multivariate-adjusted average daily sedentary time<sup>a</sup> by occupational social class.

14  
15  
16 Model 1: adjusted for age and sex; model 2: further adjustments for area deprivation, BM, limiting long  
17 standing illness, difficulty with usual activities, car ownership, drinking frequency, and smoking status; model  
18 3: further adjustments for self-reported time spent in MVPA, accelerometry-measured MVPA time, and average  
19 accelerometer wear time on valid days. Models with accelerometer sedentary time as the outcome were also  
20 adjusted for average accelerometer wear time on valid days.

21 a Coefficients represent estimated marginal means from generalised linear models, with 95% confidence  
22 intervals. Linear trend p values were obtained from linear regression.

23  
24  
25 **Figure 6:** Multivariate-adjusted sedentary time by area deprivation quintile.

26  
27  
28 Model 1: adjusted for age and sex; model 2: further adjustments for area deprivation, BM, limiting long  
29 standing illness, difficulty with usual activities, car ownership, drinking frequency, and smoking status; model  
30 3: further adjustments for self-reported time spent in MVPA, accelerometry-measured MVPA time, and average  
31 accelerometer wear time on valid days. Models with accelerometer sedentary time as the outcome were also  
32 adjusted for average accelerometer wear time on valid days.

33 a Coefficients represent estimated marginal means from generalised linear models, with 95% confidence  
34 intervals. Linear trend p values were obtained from linear regression.

35 b Q1 indicates most deprived, Q5 indicates least deprived  
36  
37  
38  
39  
40  
41  
42  
43  
44  
45  
46  
47  
48  
49  
50  
51  
52  
53  
54  
55  
56  
57  
58  
59  
60

## Supplemental Digital Content 1

### Unabridged Methods

#### *Study Sample*

The Health Survey for England (HSE) is a repeated nationally representative study of individuals living in private households in England. We drew our sample from the 2008 HSE which had a special focus on physical activity and sedentary behaviour. The sample is drawn using multi-stage stratified probability sampling with postcode sectors as the primary sampling unit. More details of the sample design are available elsewhere (2). The household response rate was 64% for the main sample, and 73% for the accelerometer sub-sample (3). Ethical approval for the 2008 HSE was obtained from the Oxford A Research Ethics Committee (reference number 07/H0604/102). We included adults aged 16 and over who had both valid accelerometry and self-reported SB data. Participants provided written informed consent. In total, 2289 adults (1030 males) provided valid accelerometry data, with 227679 (1020 males) and 2253 (1014) males) also providing self-reported TV and non-TV time respectively. 1170 (576 males) provided occupational sitting/standing time

#### *Demographics and contextual variables*

Trained fieldworkers assessed participants' demographics, self-rated health, long standing illness, alcohol consumption and smoking using Computer Assisted Personal Interviewing. Height and weight were measured by the same fieldworkers using standard protocols that have been described in detail elsewhere (5). Body mass index (BMI) was computed as weight (kilograms) divided by squared height (metres).

#### *Socioeconomic position measures*

Social class was determined using the Registrar General's classification and was grouped as I&II (professional and managerial/technical), III Non-manual, III manual, IV&V (semi-skilled manual and



1  
2  
3 unskilled manual). Household income was converted to equivalised annual household income that is  
4  
5 adjusted for the number of persons in the household using the McClements scoring system (15). The  
6  
7 income data presented here are based on quartiles. Highest education qualification was coded as no  
8  
9 qualification and three levels: Level 1 represents secondary school or below (NVQ1/CSE and  
10  
11 NVQ2/GCE O Level equivalent); Level 2 represents post-compulsory secondary school (NVQ3/GCE  
12  
13 A Level equivalent) and Level 3 represents higher education (higher education below Degree and  
14  
15 NVQ4/NVQ5/Degree or higher). Area deprivation was assessed using the 2004 Index of Multiple  
16  
17 Deprivation (IMD) which provides a measure of area deprivation with deprivation based on measures  
18  
19 in seven domains: income, employment, health deprivation and disability, education, skills and  
20  
21 training, barriers to housing and services, crime and living environment. IMD was initially a  
22  
23 continuous score that we grouped into quintiles (1 representing the most deprived quintile, and 5  
24  
25 representing the least deprived).  
26  
27  
28  
29

### 30 *Sedentary time and physical activity measures*

#### 31 *Objective measures*

32  
33  
34  
35  
36 A random sub-sample of HSE 2008 participants were selected to wear a uniaxial accelerometer  
37  
38 (Actigraph model GT1M, Pensacola, Florida) during waking hours for seven consecutive days. At the  
39  
40 core addresses that were eligible for accelerometry, up to two adults in total were selected to wear the  
41  
42 accelerometer (up to one adult in those households with eligible children). Full details of the  
43  
44 accelerometry sample selection procedure can be found elsewhere (6). At the end of the initial HSE  
45  
46 2008 interview, interviewers obtained agreement for participation in the accelerometry study,  
47  
48 provided the accelerometers and explained procedures. The accelerometry data were processed using  
49  
50 specialist software (KineSoft, New Brunswick). In consistency with previous epidemiological SB  
51  
52 studies (8), the sampling epoch was one minute and non-wear time was defined as periods of at least  
53  
54 60 consecutive minutes of zero counts, with allowance for up to 2 consecutive minutes of 1–99  
55  
56 counts/minute. For a day to be ‘valid’ for inclusion in the analyses, participants had to have worn the  
57  
58 accelerometer for a minimum of 600 minutes. Like previously (7), participants with at least one day  
59  
60

1  
2  
3 of valid wear were included in these analyses, although the majority (76%, N=1742) had between six  
4 and seven days and 95% (N=2165) had at least three valid days. All physical activity and sedentary  
5 time variables were converted to time (in minutes) per valid day.  
6  
7  
8  
9

### 10 11 12 13 *Self-reported measures* 14

15  
16 Sedentary time was assessed using a set of questions on the usual weekday time spent on: a) TV  
17 (including DVDs and videos) viewing (“In the last four weeks, how much time did you spend  
18 watching TV/videos) on an average week day?”); and b) any other sitting during non-work times,  
19 including reading and computer use (“In the last 4 weeks, how much time did you spend sitting down  
20 doing any other activity on an average weekday? Please do not include time spent doing these  
21 activities while at work”). An equivalent set of questions assessed TV and non-TV sedentary time in  
22 the weekend days. For those participants who were economically active (i.e. those who answered  
23 “yes” to the question “In the last 4 weeks, did you do any paid or unpaid work either as an employee  
24 or as self-employed (including voluntary or part time work)?”) another set of questions assessed the  
25 average daily times spent sitting/standing while at work (“On an average work day in the last four  
26 weeks, how much time did you usually spend sitting down or standing up?”). (14) While it is not  
27 ideal to include standing as a measure of sedentary time, it is often necessitated by the unavailability  
28 of sitting-specific data, and standing is routinely included in objectively measured sedentary data as  
29 most accelerometers are unable to differentiate between time spent sitting or standing. For the  
30 purposes of this study, standing will be considered a measure of sedentary behaviour.  
31  
32  
33  
34  
35  
36  
37  
38  
39  
40  
41  
42  
43  
44  
45  
46  
47  
48  
49

50 Physical activity was assessed using the long version of the Health Survey for England questionnaire  
51 that was used in the 1997 Survey for the first time and was repeated in the 1998, 2006, and 2008  
52 Surveys. Questions included frequency (number of days in the last 4 weeks) and duration (minutes  
53 per day) of participation in walking for any purpose, domestic physical activity (12) (11) and any  
54 recreational exercise, (e.g. cycling, swimming, aerobics, gym exercises, dancing, team sports, racket  
55 sports) (9). Occupational activity was measured as average daily (per day at work) times spent on  
56  
57  
58  
59  
60

1  
2  
3 walking, climbing stairs or ladders, and lifting, carrying or moving loads (5). We calculated MVPA  
4  
5 using established metabolic equivalent tables (1). The criterion validity of the physical activity  
6  
7 questionnaire has been demonstrated in a study of 106 English adults from the general population (45  
8  
9 men) where the output of accelerometers (worn for two non-consecutive weeks over a month period)  
10  
11 was compared against the above questions (4, 13).  
12  
13

### 14 15 16 17 18 *Data handling/Statistical analysis*

#### 19 20 21 *Regrouping the Socioeconomic position variables*

22  
23 Due to small numbers of observations, the top and bottom two categories of social class were  
24  
25 collapsed, resulting in four categories: unskilled /semi-skilled manual; skilled manual; skilled non-  
26  
27 manual; and managerial/technical/ professional. Using existing methods (10), we derived a composite  
28  
29 Socioeconomic Position (SEP) score using household income, individual education, and occupational  
30  
31 social class of the head of household. The lowest category of each component variable was assigned a  
32  
33 SEP score of 0, the second lowest category was given a SEP score of 1, and so on, with the highest  
34  
35 category given a SEP score of 4. The scores for each individual SEP indicator were then aggregated,  
36  
37 resulting in a SEP score ranging from 0 to 12. Due to small numbers of observations in the high and  
38  
39 low end of the score, the SEP score was collapsed into five categories of comparable size (0-3=SEP1;  
40  
41 4-5=SEP2; 6-7=SEP3; 8=SEP4; 9-12=SEP5), with 1 representing the lowest SEP, and 5 the highest.  
42  
43  
44  
45  
46  
47  
48

#### 49 50 51 *Deriving sedentary time and physical activity variables*

52  
53 Week- and weekend day-specific TV and non-TV leisure time sitting were converted to all-week time  
54  
55 (minutes) using the following formula:  $(\text{weekday time} \times 5) + (\text{weekend day time} \times 2) / 7$ .  
56  
57 Occupational sitting/standing time (minutes) per day was calculated by multiplying the number of  
58  
59 days worked per week by the average time spent sitting/standing at work on a work day, and dividing  
60  
by 7.

1  
2  
3 Weekly self-reported MVPA hours/week were calculated as number of days of participation  
4 multiplied by time per day in each activity type (walking, cycling, and each other sport and exercise  
5 the questionnaire enquired about) (5, 6) Due to the large number of participants and the very skewed  
6 distribution, self-reported MVPA was categorised in to none, less than 30 minutes, 30 minutes to 1  
7 hour, 1 to 2 hours, and more than 2 hours of MVPA per day.  
8  
9  
10  
11  
12  
13  
14  
15  
16  
17

18 For the accelerometry data we used 0-99 counts/minute to denote sedentary (<1.5 MET) (7); 200-  
19 2,019 counts/minute to denote light physical activity; and  $\geq 2,020$  counts/minute to denote MVPA (>3  
20 MET) (16). Accelerometer-measured sedentary time and physical activity variables were converted to  
21 time (in minutes) per valid day.  
22  
23  
24  
25  
26  
27  
28  
29

### 30 *Missing data and multiple imputation*

31 To improve the normality of the residuals that are required for linear regression, outliers outside 3  
32 standard deviations of the mean for all continuous variables apart from age were removed from the  
33 analyses. This excluded 1.3% to 2.2% of cases from each continuous variable. Due to a substantial  
34 proportion of cases with at least one missing value in at least one covariable or exposure variable  
35 (22% to 28% depending on the exposure variable) we performed multiple imputation. IBM SPSS v20  
36 was used to conduct the multiple imputation, missing values were imputed for all covariables and  
37 exposures, with observed maximum and minimum values used as constraints. Outcome variables did  
38 not have missing values imputed, but were included in the imputation models to predict missing  
39 values in other variables. Linear regression was used as the type of imputation, and 5 cycles of  
40 imputation were conducted resulting in 5 imputed datasets. Results from these 5 datasets were  
41 combined using the multiple imputation module in SPSS to provide pooled results. The imputed  
42 sample size is limited to the number of valid observations for each outcome variable (2279 for  
43 accelerometry-measured ST, 2269 for TV time, 2253 for non-TV sitting time, and 1170 for  
44 occupational sitting time). Non-imputed results are presented in the appendix.  
45  
46  
47  
48  
49  
50  
51  
52  
53  
54  
55  
56  
57  
58  
59  
60

### *Dealing with non-response*

Analyses were weighted for non-response (5) to give a sample that was representative of adults living in England. In brief, the non-response weights were calculated by fitting a logistic regression model (weighted by a previously developed weighting factor)(5) for all adults with interview completion as the outcome and age group by sex, household type, geographical area, and household social class as covariates. The non-response weights, which were trimmed at the 1% tails to remove extreme values, were calculated as the inverse of the predicted probabilities of response.(5) The complex samples module in SPSS was used to account for clusters in the survey design.

### *Statistical analysis*

The associations between each of the socioeconomic indicators (household income, social class, education, SEP score, and area deprivation,) and each individual ST indicator (TV time, non-TV sitting time, occupational sitting/standing, and accelerometer-measured ST) was examined using generalised linear models, and by multiple linear regression to determine linear trend p values. Results are presented for the whole week, the weekday/weekend day-specific results can be found in the online appendix. SPSS version 21 was used for all analyses. For all multivariate analyses we used the complex samples generalised linear models (GLM) procedure to take into account the complex survey design.

All statistical models were run for each combination of dependent variable and main exposure.

Different models were adjusted for: 1) age and sex; 2) additionally for BMI, limiting long standing illness, difficulty with usual activities, car ownership, drinking frequency, smoking status, and other socioeconomic indicators (household income, social class, area deprivation); 3) additionally for time spent in self-reported MVPA and accelerometer-measured MVPA, and average accelerometer wear

1  
2  
3 time on valid days Models with accelerometer-measured ST as the outcome were also adjusted for  
4  
5 average accelerometer wear time on each valid day. There was no evidence of colinearity in the  
6  
7 multivariate model as no variance inflation factor value was higher than approximately 1.5, with most  
8  
9 values just over 1. Residual statistics and plots for each model were checked for normality,  
10  
11 independence of observations, homoscedasticity, and influential outliers.  
12  
13

14  
15  
16 GLM coefficients indicate mean differences in sedentary time (in minutes) between the reference  
17  
18 category and each of the other SEP categories. The lowest SEP category (<£10671 for household  
19  
20 income, unskilled/ semi-skilled manual for social class, most deprived quintile for area deprivation,  
21  
22 SEP1 (lowest socioeconomic position) for SEP score) is the reference category for the mean  
23  
24 difference in the outcome (and associated confidence interval for the difference) in all CSGLMs.  
25  
26  
27  
28

## 29 30 31 32 33 34 35 36 37 38 39 40 41 42 43 44 45 46 47 48 49 50 51 52 53 54 55 56 57 58 59 60

### References

1. Ainsworth BE, Haskell WL, Whitt MC et al. Compendium of physical activities: an update of activity codes and MET intensities. *Med Sci Sports Exerc.* 2000;32(9 Suppl):S498-504.
2. Joint Health Surveys Unit. *The Health Survey for England 2008. Volume 1* Leeds2010.
3. Joint Health Surveys Unit. *The Health Survey for England 2008. Volume 2* Leeds2010.
4. Joint Health Surveys Unit. *The Health Survey for England Physical Activity Validation Study: substantive report.* Leeds: Health and Social Care Information Centre; 2007.
5. Joint Health Surveys Unit. *The Health Survey for England 2008.* Leeds: The Information Centre for Health and Social Care; 2009.
6. Joint Health Surveys Unit. *The Health Survey for England 2008, Volume 2: Methods and Documentation.* Leeds: The Information Centre for Health and Social Care; 2009.
7. Matthews C, George SM, Moore SC et al. Amount of time spent in sedentary behaviors and cause-specific mortality in US adults. *The American Journal of Clinical Nutrition.* 2012;95(2):437-45.
8. Matthews CE, Chen KY, Freedson PS et al. Amount of time spent in sedentary behaviors in the united states, 2003-2004. *Am J Epidemiol.* 2008;167(7):875-81.
9. Stamatakis E, Chaudhury M. Temporal trends in adults' sports participation patterns in England between 1997 and 2006: the Health Survey *Br J Sports Med.* 2008;42:601-8.
10. Stamatakis E, Hillsdon M, Mishra G, Hamer M, Marmot M. Television viewing and other screen-based entertainment in relation to multiple socioeconomic status indicators and area deprivation: the Scottish Health Survey 2003. *J Epidemiol Commun Health.* 2009;63:734-40.
11. Stamatakis E, Ekelund U, Wareham N. Temporal trends in physical activity in England. The Health Survey for England 1991 to 2004. . *Prev Med.* 2007;45:416-23.
12. Stamatakis E, Hamer M, Lawlor DA. Physical activity, mortality and cardiovascular disease: Is domestic physical activity beneficial? The Scottish Health Survey 1995, 1998 and 2003. . *Am J Epidemiol.* 2009;169:1191-200.

13. Stamatakis E, Hamer M, Primatesta P. Cardiovascular medication, physical activity and mortality: cross-sectional population study with ongoing mortality follow-up. *Heart*. 2009;95(6):448-53.
14. Stamatakis E, Hamer M, Tilling K, Lawlor DA. Sedentary time in relation to cardio-metabolic risk factors: differential associations for self-report vs accelerometry in working age adults. *Int J Epidemiol*. 2012.
15. Stamatakis E, Hillsdon M, Mishra G, Hamer M, Marmot M. Television viewing and other screen-based entertainment in relation to multiple socioeconomic status indicators and area deprivation: the Scottish Health Survey 2003. *Journal of Epidemiology and Community Health*. 2009;63(9):734-40.
16. Troiano RP, Berrigan D, Dodd KW, Masse LC, Tilert T, McDowell M. Physical activity in the United States measured by accelerometer. *Med Sci Sports Exerc*. 2008;40(1):181-8.

For peer review only

Supplementary Figure S2: Multivariate-adjusted average daily sedentary time<sup>a</sup> by SEP score<sup>b</sup>. Unimputed, casewise-deleted data.

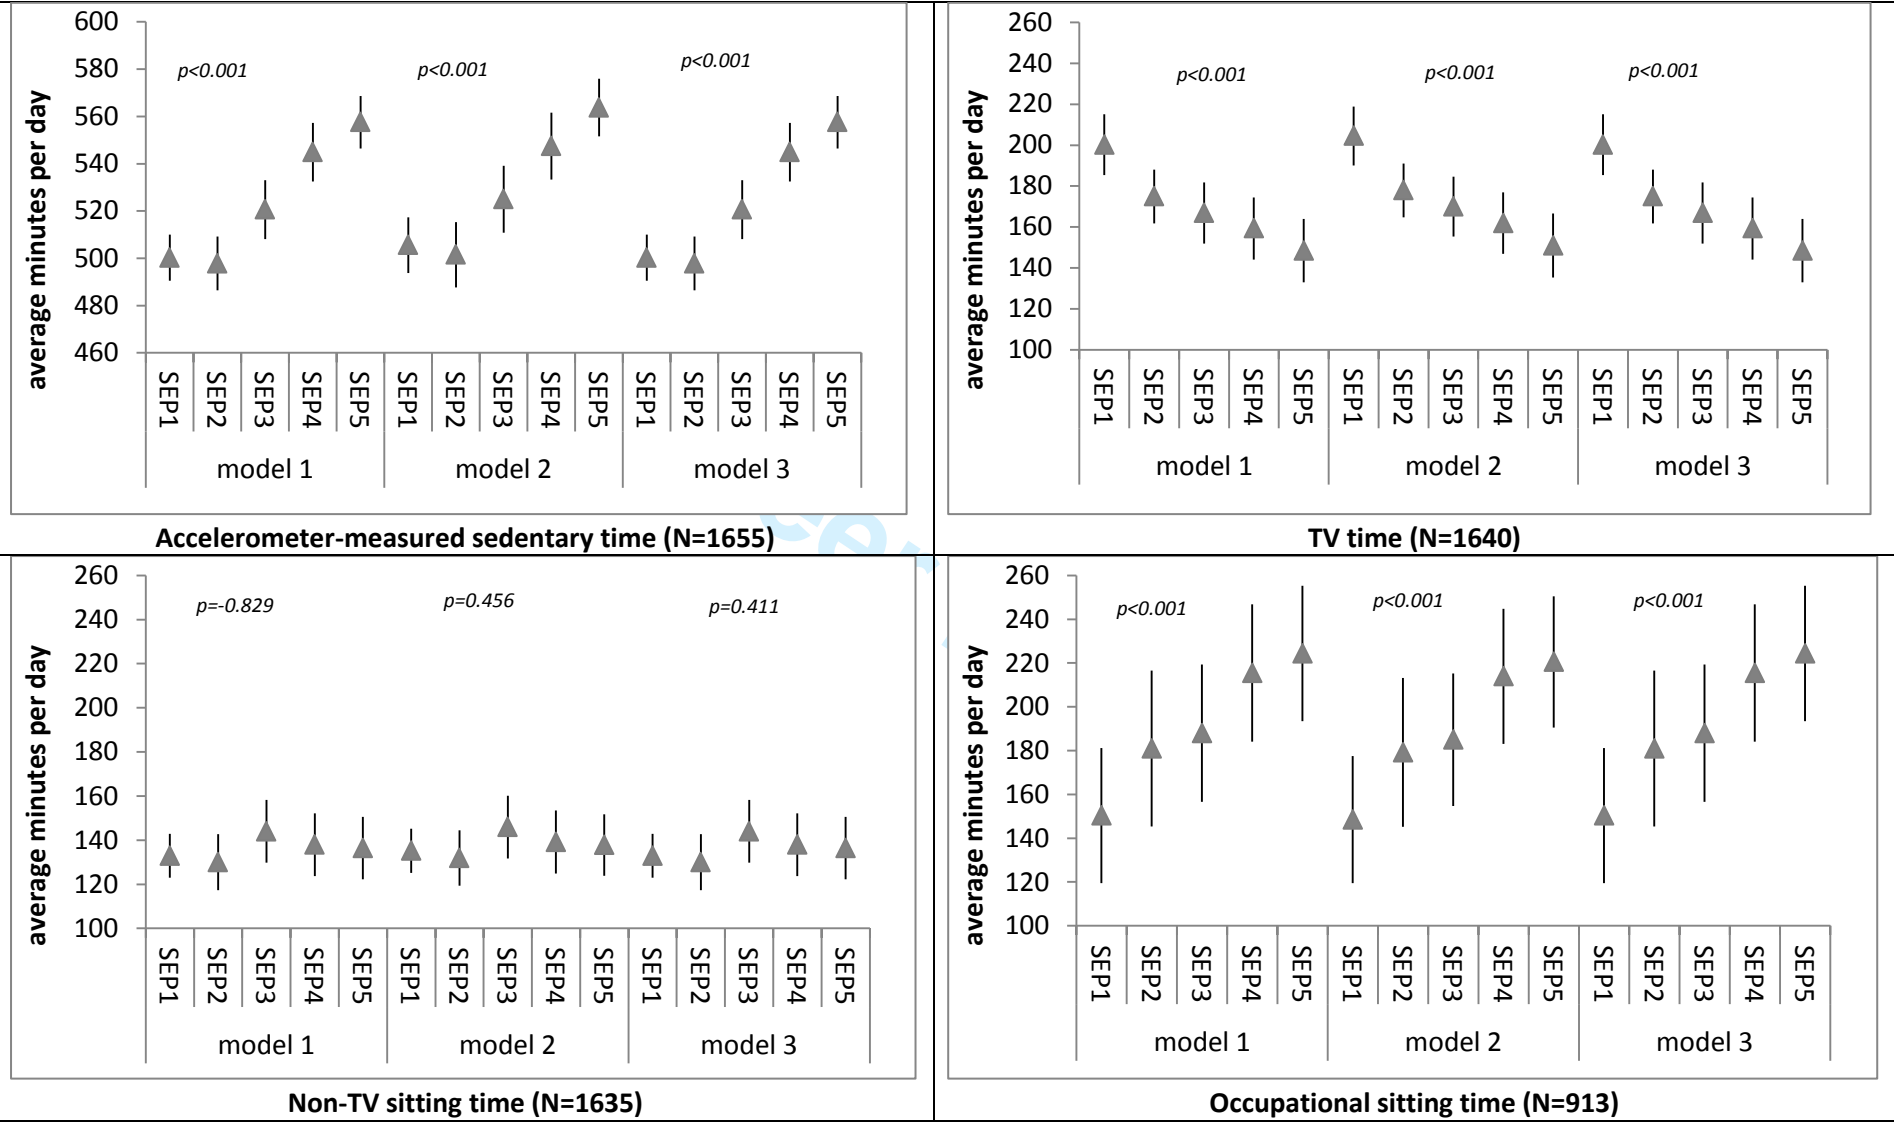

Model 1: adjusted for age and sex; model 2: further adjustments for area deprivation, BM, limiting long standing illness, difficulty with usual activities, car ownership, drinking frequency, and smoking status; model 3: further adjustments for self-reported time spent in MVPA, accelerometer-measured MVPA time, and average accelerometer wear time on valid days. Models with accelerometer sedentary time as the outcome were also adjusted for average accelerometer wear time on valid days.

<sup>a</sup> Coefficients represent estimated marginal means from generalised linear models, with 95% confidence intervals. Linear trend p values were obtained from linear regression.

<sup>b</sup> SEP1 indicates most deprived, SEP 5 indicates least deprived



Supplementary Figure S3: Multivariate-adjusted average daily sedentary time<sup>a</sup> by SEP score<sup>b</sup>. Weekdays.

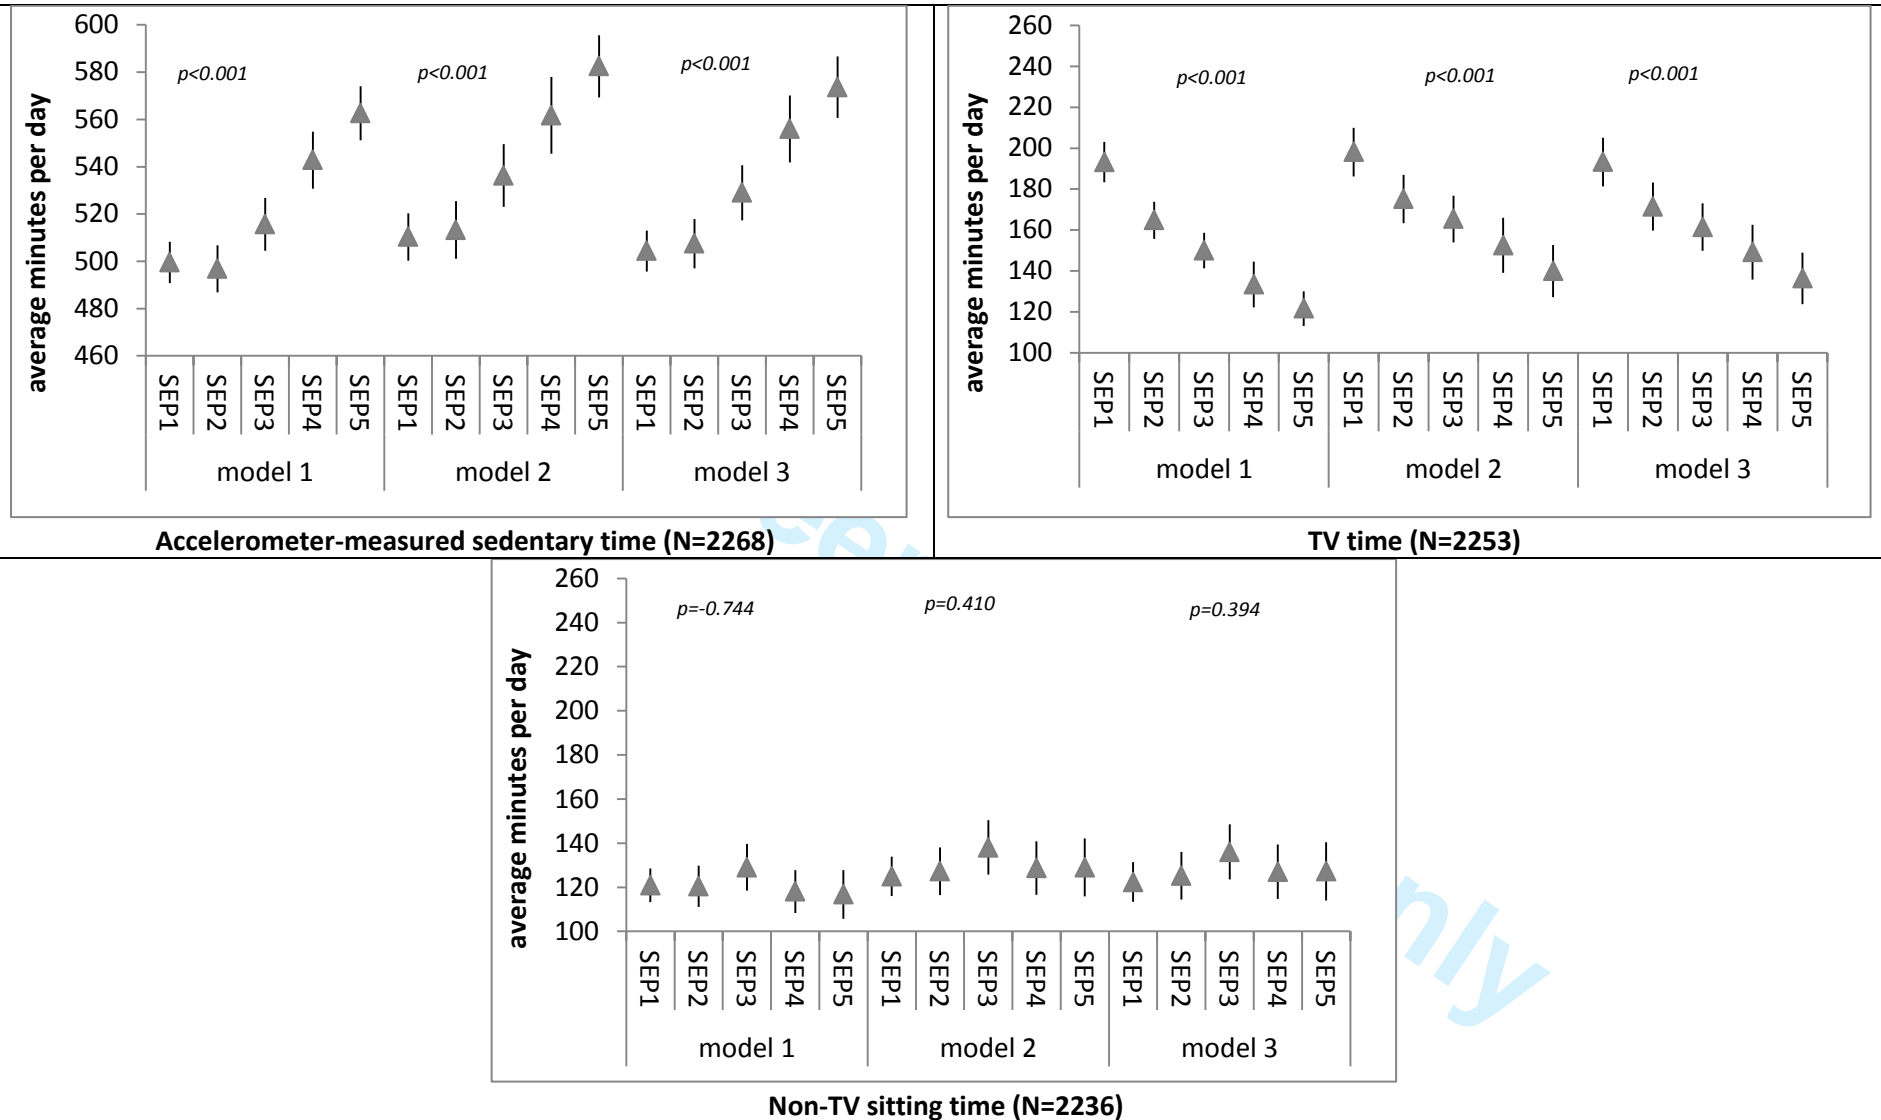

Model 1: adjusted for age and sex; model 2: further adjustments for area deprivation, BM, limiting long standing illness, difficulty with usual activities, car ownership, drinking frequency, and smoking status; model 3: further adjustments for self-reported time spent in MVPA, accelerometer-measured MVPA time, and average accelerometer wear time on valid days. Models with accelerometer sedentary time as the outcome were also adjusted for average accelerometer wear time on valid days.

<sup>a</sup> Coefficients represent estimated marginal means from generalised linear models, with 95% confidence intervals. Linear trend p values were obtained from linear regression.

<sup>b</sup> SEP1 indicates most deprived, SEP 5 indicates least deprived

Supplementary Figure S4: Multivariate-adjusted average daily sedentary time<sup>a</sup> by SEP score<sup>b</sup>. Weekend days.

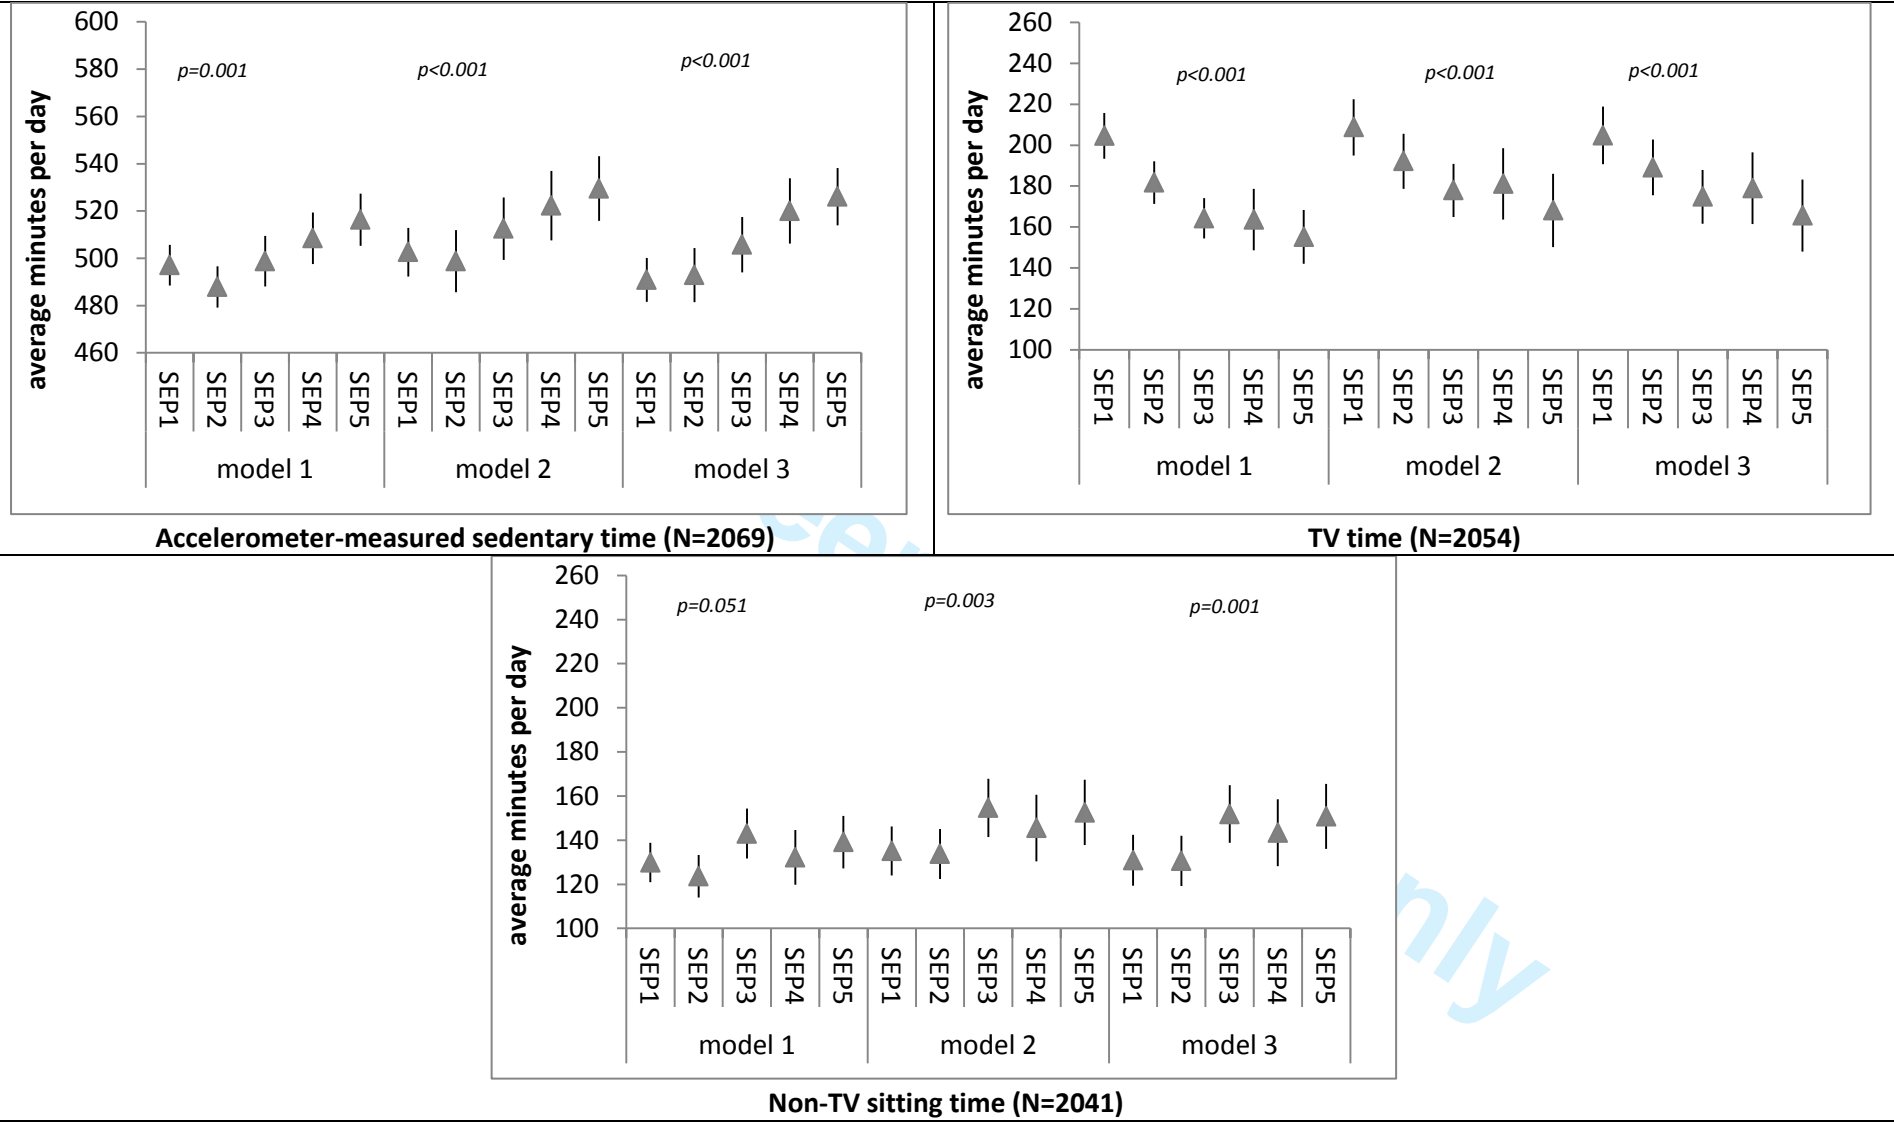

Model 1: adjusted for age and sex; model 2: further adjustments for area deprivation, BM, limiting long standing illness, difficulty with usual activities, car ownership, drinking frequency, and smoking status; model 3: further adjustments for self-reported time spent in MVPA, accelerometer-measured MVPA time, and average accelerometer wear time on valid days. Models with accelerometer sedentary time as the outcome were also adjusted for average accelerometer wear time on valid days.

<sup>a</sup> Coefficients represent estimated marginal means from generalised linear models, with 95% confidence intervals. Linear trend p values were obtained from linear regression.

<sup>b</sup> SEP1 indicates most deprived, SEP 5 indicates least deprived



Figure 1: Multivariate-adjusted average daily sedentary time by SEP score  
254x190mm (300 x 300 DPI)

Review only

1  
2  
3  
4  
5  
6  
7  
8  
9  
10  
11  
12  
13  
14  
15  
16  
17  
18  
19  
20  
21  
22  
23  
24  
25  
26  
27  
28  
29  
30  
31  
32  
33  
34  
35  
36  
37  
38  
39  
40  
41  
42  
43  
44  
45  
46  
47  
48  
49  
50  
51  
52  
53  
54  
55  
56  
57  
58  
59  
60

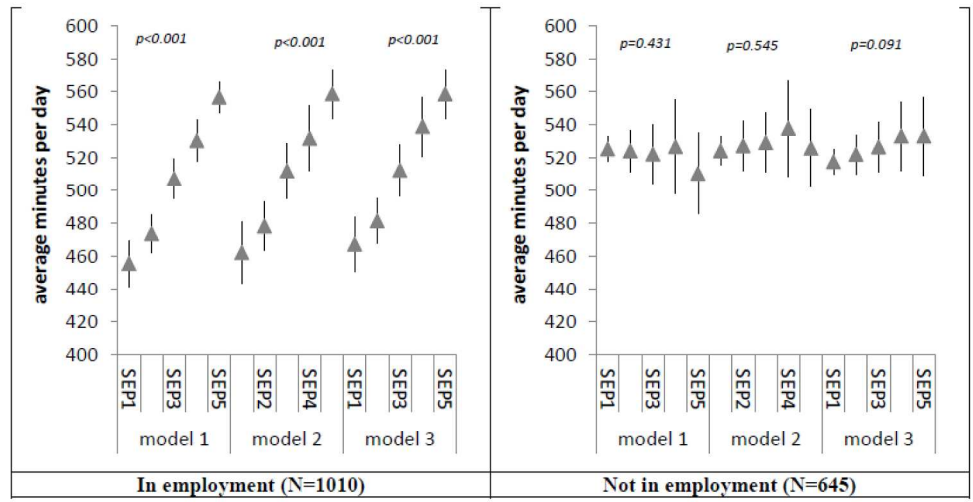

Figure 2: Multivariate-adjusted accelerometer-measured sedentary time by SEP Score for individuals stratified by employment status  
254x190mm (300 x 300 DPI)

ew only



Figure 3: Multivariate-adjusted average daily sedentary time by household income quartile  
254x190mm (300 x 300 DPI)

1  
2  
3  
4  
5  
6  
7  
8  
9  
10  
11  
12  
13  
14  
15  
16  
17  
18  
19  
20  
21  
22  
23  
24  
25  
26  
27  
28  
29  
30  
31  
32  
33  
34  
35  
36  
37  
38  
39  
40  
41  
42  
43  
44  
45  
46  
47  
48  
49  
50  
51  
52  
53  
54  
55  
56  
57  
58  
59  
60

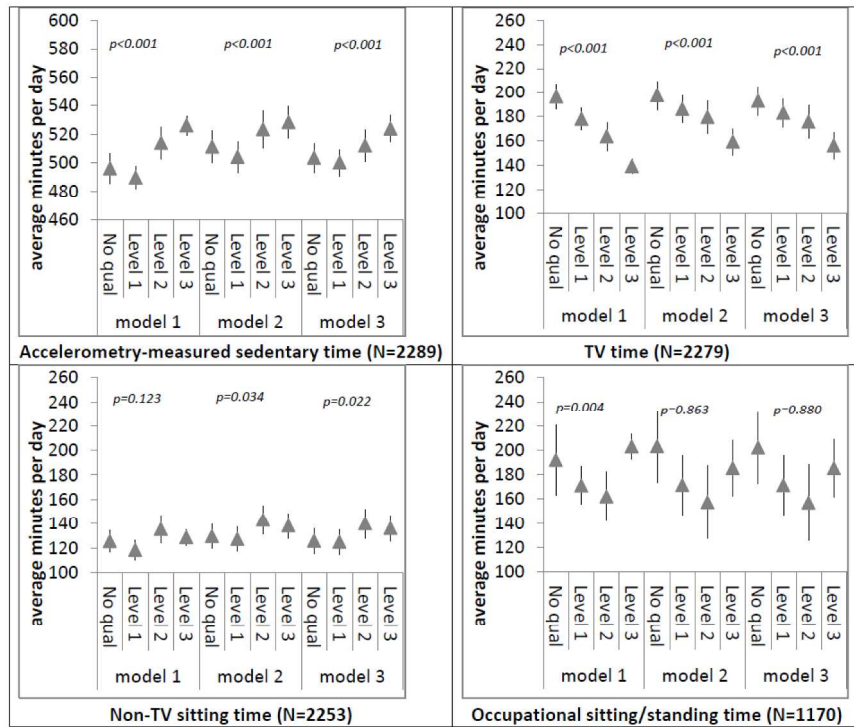

Figure 4: Multivariate-adjusted difference average daily sedentary time by highest qualification  
254x190mm (300 x 300 DPI)

Review only

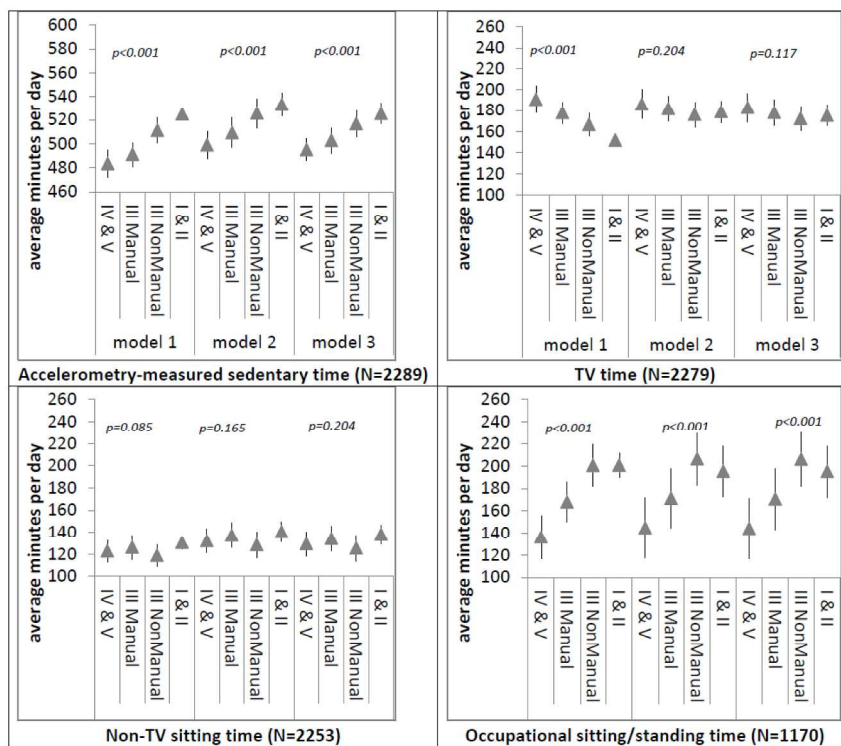

Figure 5: Multivariate-adjusted average daily sedentary timea by occupational social class  
254x190mm (300 x 300 DPI)

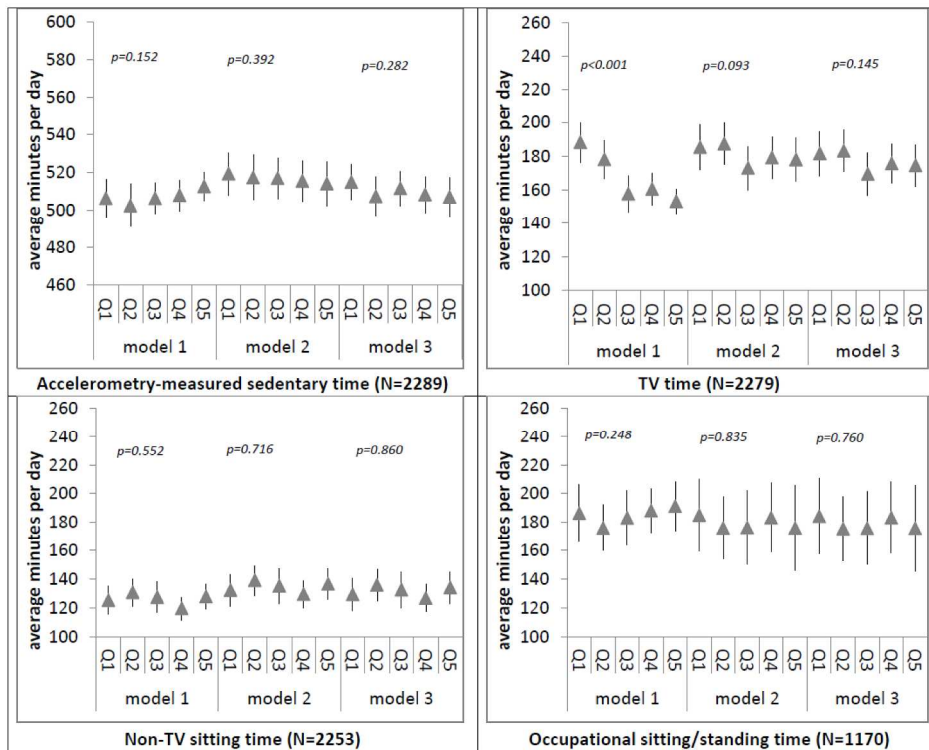

Figure 6: Multivariate-adjusted sedentary time by area deprivation quintiles  
254x190mm (300 x 300 DPI)

View only



STROBE 2007 (v4) Statement—Checklist of items that should be included in reports of *cross-sectional studies*

| Section/Topic                | Item # | Recommendation                                                                                                                                                                       | Reported on page # |
|------------------------------|--------|--------------------------------------------------------------------------------------------------------------------------------------------------------------------------------------|--------------------|
| Title and abstract           | 1      | (a) Indicate the study's design with a commonly used term in the title or the abstract                                                                                               | 2                  |
|                              |        | (b) Provide in the abstract an informative and balanced summary of what was done and what was found                                                                                  | 2                  |
| <b>Introduction</b>          |        |                                                                                                                                                                                      |                    |
| Background/rationale         | 2      | Explain the scientific background and rationale for the investigation being reported                                                                                                 | 3-4                |
| Objectives                   | 3      | State specific objectives, including any prespecified hypotheses                                                                                                                     | 4                  |
| <b>Methods</b>               |        |                                                                                                                                                                                      |                    |
| Study design                 | 4      | Present key elements of study design early in the paper                                                                                                                              | 6                  |
| Setting                      | 5      | Describe the setting, locations, and relevant dates, including periods of recruitment, exposure, follow-up, and data collection                                                      | 6-7                |
| Participants                 | 6      | (a) Give the eligibility criteria, and the sources and methods of selection of participants                                                                                          | 6                  |
| Variables                    | 7      | Clearly define all outcomes, exposures, predictors, potential confounders, and effect modifiers. Give diagnostic criteria, if applicable                                             | 7-8                |
| Data sources/<br>measurement | 8*     | For each variable of interest, give sources of data and details of methods of assessment (measurement). Describe comparability of assessment methods if there is more than one group | 6-8                |
| Bias                         | 9      | Describe any efforts to address potential sources of bias                                                                                                                            | 8                  |
| Study size                   | 10     | Explain how the study size was arrived at                                                                                                                                            | 10                 |
| Quantitative variables       | 11     | Explain how quantitative variables were handled in the analyses. If applicable, describe which groupings were chosen and why                                                         | 9-10               |
| Statistical methods          | 12     | (a) Describe all statistical methods, including those used to control for confounding                                                                                                | 9-10               |
|                              |        | (b) Describe any methods used to examine subgroups and interactions                                                                                                                  | 9-10               |
|                              |        | (c) Explain how missing data were addressed                                                                                                                                          | 9                  |
|                              |        | (d) If applicable, describe analytical methods taking account of sampling strategy                                                                                                   | 10                 |
|                              |        | (e) Describe any sensitivity analyses                                                                                                                                                | 9-10               |
| <b>Results</b>               |        |                                                                                                                                                                                      |                    |

|                          |     |                                                                                                                                                                                                              |       |
|--------------------------|-----|--------------------------------------------------------------------------------------------------------------------------------------------------------------------------------------------------------------|-------|
| Participants             | 13* | (a) Report numbers of individuals at each stage of study—eg numbers potentially eligible, examined for eligibility, confirmed eligible, included in the study, completing follow-up, and analysed            | 10-11 |
|                          |     | (b) Give reasons for non-participation at each stage                                                                                                                                                         | 10-11 |
|                          |     | (c) Consider use of a flow diagram                                                                                                                                                                           |       |
| Descriptive data         | 14* | (a) Give characteristics of study participants (eg demographic, clinical, social) and information on exposures and potential confounders                                                                     | 10-12 |
|                          |     | (b) Indicate number of participants with missing data for each variable of interest                                                                                                                          | 9     |
| Outcome data             | 15* | Report numbers of outcome events or summary measures                                                                                                                                                         |       |
| Main results             | 16  | (a) Give unadjusted estimates and, if applicable, confounder-adjusted estimates and their precision (eg, 95% confidence interval). Make clear which confounders were adjusted for and why they were included | 12    |
|                          |     | (b) Report category boundaries when continuous variables were categorized                                                                                                                                    | 7-10  |
|                          |     | (c) If relevant, consider translating estimates of relative risk into absolute risk for a meaningful time period                                                                                             | n/a   |
| Other analyses           | 17  | Report other analyses done—eg analyses of subgroups and interactions, and sensitivity analyses                                                                                                               | 14-15 |
| <b>Discussion</b>        |     |                                                                                                                                                                                                              |       |
| Key results              | 18  | Summarise key results with reference to study objectives                                                                                                                                                     | 15    |
| Limitations              | 19  | Discuss limitations of the study, taking into account sources of potential bias or imprecision. Discuss both direction and magnitude of any potential bias                                                   | 16-17 |
| Interpretation           | 20  | Give a cautious overall interpretation of results considering objectives, limitations, multiplicity of analyses, results from similar studies, and other relevant evidence                                   | 16-17 |
| Generalisability         | 21  | Discuss the generalisability (external validity) of the study results                                                                                                                                        | 17    |
| <b>Other information</b> |     |                                                                                                                                                                                                              |       |
| Funding                  | 22  | Give the source of funding and the role of the funders for the present study and, if applicable, for the original study on which the present article is based                                                | 18    |

\*Give information separately for cases and controls in case-control studies and, if applicable, for exposed and unexposed groups in cohort and cross-sectional studies.

**Note:** An Explanation and Elaboration article discusses each checklist item and gives methodological background and published examples of transparent reporting. The STROBE checklist is best used in conjunction with this article (freely available on the Web sites of PLoS Medicine at <http://www.plosmedicine.org/>, Annals of Internal Medicine at <http://www.annals.org/>, and Epidemiology at <http://www.epidem.com/>). Information on the STROBE Initiative is available at [www.strobe-statement.org](http://www.strobe-statement.org).

# BMJ Open

## Objectively-assessed and self-reported sedentary time in relation to multiple socioeconomic status indicators among adults in England: a cross-sectional study

|                                 |                                                                                                                                                                                                                                                                                                                                                                                                 |
|---------------------------------|-------------------------------------------------------------------------------------------------------------------------------------------------------------------------------------------------------------------------------------------------------------------------------------------------------------------------------------------------------------------------------------------------|
| Journal:                        | <i>BMJ Open</i>                                                                                                                                                                                                                                                                                                                                                                                 |
| Manuscript ID:                  | bmjopen-2014-006034.R2                                                                                                                                                                                                                                                                                                                                                                          |
| Article Type:                   | Research                                                                                                                                                                                                                                                                                                                                                                                        |
| Date Submitted by the Author:   | 02-Oct-2014                                                                                                                                                                                                                                                                                                                                                                                     |
| Complete List of Authors:       | Stamatakis, Emmanuel; University of Sydney, Exercise and Sport Sciences & Charles Perkins Centre<br>Coombs, Ngaire; University of Southampton, Social Sciences<br>Rowlands, Alex; University of South Australia, Division of Health Sciences<br>Shelton, Nicola; University College London, Epidemiology and Public Health<br>Hillsdon, Melvyn; University of Exeter, Sport and Health Sciences |
| <b>Primary Subject Heading</b>: | Epidemiology                                                                                                                                                                                                                                                                                                                                                                                    |
| Secondary Subject Heading:      | Public health, Epidemiology, Sports and exercise medicine                                                                                                                                                                                                                                                                                                                                       |
| Keywords:                       | EPIDEMIOLOGY, PUBLIC HEALTH, SOCIAL MEDICINE                                                                                                                                                                                                                                                                                                                                                    |
|                                 |                                                                                                                                                                                                                                                                                                                                                                                                 |

SCHOLARONE™  
Manuscripts

**Title:** Objectively-assessed and self-reported sedentary time in relation to multiple socioeconomic status indicators among adults in England: a cross-sectional study

**Running title:** Sedentary time and socioeconomic status

**Authors:** Emmanuel Stamatakis<sup>1 2 3</sup>, Ngaire Coombs<sup>3 4</sup>, Alex Rowlands<sup>5</sup>, Nicola Shelton<sup>3</sup>, Melvyn Hillsdon<sup>6</sup>.

<sup>1</sup>Charles Perkins Centre, University of Sydney, Australia

<sup>2</sup>Discipline of Exercise and Sport Sciences, Faculty of Health Sciences, University of Sydney, Sydney, Australia

<sup>3</sup>PARG (Physical Activity Research Group), Department of Epidemiology and Public Health, University College London, London, UK

<sup>4</sup>Department of Social Sciences, University of Southampton, UK

<sup>5</sup>Division of Health Sciences, University of South Australia, Australia

<sup>6</sup>Sport and Health Sciences, College of Life and Environmental Sciences, University of Exeter, UK

**Correspondence:** Emmanuel Stamatakis, Charles Perkins Centre, University of Sydney, Johns Hopkins Drive, Sydney, NSW 2050, Australia. Email:

[emmanuel.stamatakis@sydney.edu.au](mailto:emmanuel.stamatakis@sydney.edu.au), Telephone: +61 293519668.

**Wordcount:**

Abstract: 245 words

Main text: 3693 words

## Abstract

**Objectives:** To examine the associations between socioeconomic position (SEP) and multi-domain self-reported and objectively-assessed sedentary time (ST). **Design:** cross-sectional; **Setting:** general population households in England. **Participants:** 2289 adults aged 16-96 years who participated in the 2008 Health Survey for England. **Outcomes:** accelerometer-measured sedentary time, and self-reported television time, non-television leisure-time sitting and occupational sitting/standing. We examined multivariable associations between household income, social class, education, area deprivation for each SEP indicator (including a 5-point composite SEP score computed by aggregating individual SEP indicators) and each ST indicator using generalised linear models. **Results:** Accelerometry-measured total ST and occupational sitting/standing were positively associated with SEP score and most of its constituent SEP indicators, while television time was negatively associated with SEP score and education level. Area-level deprivation was largely unrelated to ST. Those in the lowest composite SEP group spent 64 (95% CIs: 52 to 76) and 72 (48 to 98), fewer minutes/day in total ST and occupational sitting/standing compared to those in the top SEP group, and an additional 48 (35 to 60) minutes/day watching television ( $p < 0.001$  for linear trend). Stratified analyses showed that these associations between composite SEP score and total ST were evident only among participants who were in employment. **Conclusions:** Occupational sitting seems to drive the positive association between socioeconomic position and total sedentary time. Lower socioeconomic position is linked to higher TV viewing times.

## Article summary

1  
2  
3 *Strengths and limitations of this study:*  
4  
5

- 6 • First study of its kind to use objective sedentary behaviour measurements
- 7
- 8 • Broad range of self-reported sedentary behaviour types
- 9
- 10 • Broad set of socioeconomic status markers including area-level deprivation
- 11
- 12 • This is a cross-sectional design
- 13
- 14 • The occupational sedentary time question and accelerometry cannot
- 15 differentiate between sitting and standing
- 16
- 17
- 18
- 19
- 20
- 21
- 22
- 23
- 24
- 25
- 26
- 27
- 28
- 29
- 30
- 31
- 32
- 33
- 34
- 35
- 36
- 37
- 38
- 39
- 40
- 41
- 42
- 43
- 44
- 45
- 46
- 47
- 48
- 49
- 50
- 51
- 52
- 53
- 54
- 55
- 56
- 57
- 58
- 59
- 60

**Keywords**

Socioeconomic status; television; sedentary behaviour; inequality; physical activity;  
accelerometer;

## Introduction

Recent studies show that sedentary time (defined as an energy expenditure rate below 1.5 metabolic equivalents<sup>1</sup>, often characterised by activities involving sitting) is linked to increased all-cause<sup>2-5</sup> and cardiovascular<sup>2,3</sup> mortality risk independently of leisure-time physical activity participation. Television viewing, one of the most common sedentary time (ST) activities, has been specifically linked to all-cause and cardiovascular mortality and type 2 diabetes<sup>6</sup>. Objective data show that adults in England spend approximately nine to 10 hours a day being sedentary on average, out of which approximately 4 hours/day is TV watching<sup>7,8</sup>. Assuming that the average waking day lasts for 16 hrs, total sedentary time accounts for some 55-65% of total waking time. For working age adults a substantial proportion of total sedentary time takes place while at work, 56% of working English men and 50% of women report more than 5 hrs /day being sedentary while at work<sup>7</sup>.

Socioeconomic position (SEP) is a broad term that encompasses a range of characteristics, including occupational type and employment status, purchasing capacity and ownership, educational level and deprivation. Accordingly, there are several SEP indices each of which measures different aspects of social standing. Overall, SEP is a strong predictor of premature mortality and chronic disease occurrence including cardiovascular disease (CVD)<sup>9</sup> and diabetes<sup>10</sup> with individuals in lower SEP being considerably more likely to fall ill and die prematurely. Although there is no consensus on the origins of the socioeconomic gradient in health, one of the suggested pathways involves higher prevalence of poor health behaviours (e.g. physical inactivity and smoking) among lower socioeconomic groups<sup>11</sup>.

We have previously shown that lower SEP is linked consistently with increased TV viewing and other recreational screen time in Scottish adults<sup>12</sup>, a finding that has been confirmed by studies in other countries such as Belgium<sup>12,13</sup>, Australia<sup>14,15</sup>, and the US<sup>16</sup> that used TV as a

1  
2  
3 proxy for ST. However, these findings are not necessarily generalizable to overall sedentary  
4  
5 or sitting time because TV viewing is a complex exposure that seems to be a poor index of  
6  
7 overall ST<sup>17</sup>. In a recent study comparing associations between TV time and objectively  
8  
9 measured sedentary time, associations were of fair magnitude, but were not consistent across  
10  
11 population sub-groups<sup>18</sup>. The results of the few studies that looked at overall (self-reported)  
12  
13 sitting in relation to SEP are inconsistent. Higher social position was linked to higher overall  
14  
15 sitting time among Australian women<sup>19</sup> but education level was unrelated to sitting time  
16  
17 among Portuguese adults<sup>20</sup>. Objective measuring methodologies such as accelerometers and  
18  
19 inclinometers can give more comprehensive and complete estimates of total sedentary  
20  
21 behaviour than partial self-reported indices such as TV viewing, or self-reported total sitting  
22  
23 time, which may be more difficult to recall than TV viewing and therefore be subject to more  
24  
25 measurement error. Besides, SEP characteristics that relate to occupational class and income  
26  
27 will naturally have an impact on work time sitting. For example, manual unskilled workers  
28  
29 normally spend less time sitting during work than professionals in managerial office-based  
30  
31 jobs<sup>21</sup>. Similarly, higher incomes and the associated spending capacity might impact on the  
32  
33 time spent sitting driving a car or commuting. To our knowledge, no study has looked at the  
34  
35 associations between SEP defined using education, occupational class, income and area  
36  
37 deprivation indices, and SB estimated using self-reported sitting across different domains as  
38  
39 well as objective methods.  
40  
41  
42  
43  
44

45  
46 The aim of this study was to look at the associations between multiple SEP indicators and  
47  
48 self-reported indices of sitting time and SB as well as objectively-assessed total SB time. We  
49  
50 used data from one of the largest European accelerometry general population studies, the  
51  
52 2008 Health Survey for England.  
53  
54

## 55 56 **Methods** 57 58 59 60



### ***Study Sample***

The Health Survey for England (HSE) is a repeated nationally representative study of individuals living in private households in England. We drew our sample from the 2008 HSE which had a special focus on physical activity and sedentary behaviour. The sample is drawn using multi-stage stratified probability sampling with postcode sectors as the primary sampling unit. More details of the sample design are available elsewhere<sup>8</sup>. The overall interview household response rate for the main sample of 15,102 adults was 64%, and for the accelerometer sub-sample of 4,507 adults was 73%<sup>8</sup>. In this analysis we included adults aged 16 and over (age range 16-96 years) who had both valid accelerometry and self-reported SB data. Participants provided written informed consent. An abridged methods section is presented here: the full methods section with more information can be found in supplementary file S1 (Unabridged Methods). Ethical approval was obtained from the Oxford Research Ethics Committee (reference number 07/H0604/102).

### ***Demographics and contextual variables***

Trained fieldworkers assessed participants' demographics, self-rated health, long standing illness, alcohol consumption and smoking using Computer Assisted Personal Interviewing. Height was measured using a standard stadiometer with a sliding head plate, a base plate and three connecting rods marked with a metric measuring scale. Participants were asked to remove their shoes. One measurement was taken, with the participant stretching to the maximum height. Weight was measured using Tanita electronic scales with a digital display (Tanita Corporation, Japan). Participants were asked to remove their shoes and any bulky clothing and a single measurement was recorded to the nearest 100g.<sup>7</sup> Body mass index (BMI) was computed as weight (kilograms) divided by squared height (metres).

### *Socioeconomic position measures*

Social class (of the household reference person) was determined by asking questions on participants' occupation and using the Registrar General's classification to group them as I&II (professional and managerial/technical), III Non-manual, III manual, IV&V (semi-skilled manual and unskilled manual). Equivalised household income was grouped into quintiles. Highest education qualification was coded as no qualification and three levels: Level 1 represents secondary school or below (NVQ1/CSE and NVQ2/GCE O Level equivalent); Level 2 represents post-compulsory secondary school (NVQ3/GCE A Level equivalent) and Level 3 represents higher education (higher education below Degree and NVQ4/NVQ5/Degree or higher). Area deprivation was assessed using the 2004 Index of Multiple Deprivation (IMD), a continuous score that we grouped into quintiles (1 representing the most deprived quintile, and 5 representing the least deprived).

### *Sedentary time and physical activity measures*

A random sub-sample of HSE 2008 participants were selected to wear a uniaxial accelerometer (Actigraph model GT1M, Pensacola, Florida) during waking hours for seven consecutive days. Consistent with previous epidemiological SB studies<sup>22</sup>, the sampling epoch was one minute and non-wear time was defined as periods of at least 60 consecutive minutes of zero minutely counts, with allowance for up to 2 consecutive minutes of 1–100 counts/minute. For a day to be 'valid' for inclusion in the analyses, participants had to have worn the accelerometer for a minimum of 600 minutes. Participants with at least one day of valid wear were included in these analyses.<sup>22</sup>

1  
2  
3 Self-reported sedentary time was assessed using a set of questions on the usual  
4 week/weekend day in the last four weeks prior to the interview time spent on: a) TV  
5 (including DVDs and videos) viewing; and b) any other sitting during non-work times,  
6 including reading and computer use. For those participants who were economically active  
7 another set of questions assessed the average daily times spent sitting or standing while at  
8 work<sup>17</sup>. While it is not ideal to include standing as a measure of sedentary time, it is often  
9 necessitated by the unavailability of sitting-specific data, and standing is routinely included in  
10 objectively measured sedentary data as accelerometers are unable to differentiate between  
11 time spent sitting or standing. Like previously<sup>17</sup> for the purposes of this study standing will  
12 be considered a measure of sedentary behaviour.  
13  
14  
15  
16  
17  
18  
19  
20  
21  
22  
23  
24

25  
26 Physical activity questions included frequency (number of days in the last 4 weeks) and  
27 duration (minutes per day) of participation in walking for any purpose, domestic physical  
28 activity<sup>12,23</sup>, and any recreational sports and exercise including cycling for any purpose<sup>24</sup>.  
29 Both the physical activity and the SB questions have been validated against accelerometry.<sup>25</sup>  
30  
31  
32  
33  
34  
35

### 36 ***Data handling/Statistical analysis***

#### 37 *Regrouping the Socioeconomic position variables*

38  
39 Due to small numbers of observations, the top and bottom two categories of social class were  
40 collapsed, resulting in four categories: unskilled /semi-skilled manual; skilled manual; skilled  
41 non-manual; and managerial/technical/ professional. Using existing methods<sup>12</sup>, we derived a  
42 composite Socioeconomic Position (SEP) score using household income, individual  
43 education, and occupational social class of the head of household. The lowest category of  
44 each component variable was assigned a SEP score of 0, with the highest category given a  
45 SEP score of 4. The scores for each individual SEP indicator were then aggregated, resulting  
46 in a SEP score ranging from 0 to 12. Due to small numbers of observations in the high end of  
47  
48  
49  
50  
51  
52  
53  
54  
55  
56  
57  
58  
59  
60

1  
2  
3 the score, the top SEP score was collapsed into five categories of comparable sample size:  
4  
5 SEP1 consisted of the lowest two SEP categories (0 and 1), SEP2 comprised categories 2 and  
6  
7 3, SEP3 comprised categories 4 and 5, SEP4 comprised categories 6 and 7, and SEP5  
8  
9 comprised of categories 8 and 9 (the highest observed SEP category).  
10

### 11 12 *Deriving sedentary time and physical activity variables*

13  
14  
15 Week- and weekend day-specific TV and non-TV leisure time sitting were converted to all-  
16  
17 week time (minutes) using the following formula: (weekday time  $\times$  5) + (weekend day time  $\times$   
18  
19 2) / 7. Occupational sitting/standing time (minutes) per day was calculated by multiplying the  
20  
21 number of days worked per week by the average time spent sitting/standing at work on a  
22  
23 work day, and dividing by 7. Weekly self-reported MVPA hours/week were calculated as  
24  
25 number of days of participation multiplied by time per day in each activity type<sup>7,8</sup> Due to the  
26  
27 large number of participants and the very skewed distribution, self-reported MVPA was  
28  
29 categorised in to none, less than 30 minutes, 30 minutes to 1 hour, 1 to 2 hours, and more  
30  
31 than 2 hours of MVPA per day. For the accelerometry data we used 0-99 counts/minute to  
32  
33 denote sedentary ( $<1.5$  MET)<sup>3</sup> and  $\geq 2,020$  counts/minute to denote MVPA ( $>3$  MET)<sup>26</sup>.  
34  
35 Accelerometry-measured variables were converted to time (minutes) per valid day and daily  
36  
37 ST time was calculated as the sum of the average ST minutes per valid day divided by the  
38  
39 number of valid days.  
40  
41  
42  
43  
44  
45  
46  
47

### 48 *Missing data and multiple imputation*

49  
50 Outliers outside 3 standard deviations of the mean for all continuous variables apart from age  
51  
52 were removed from the analyses to improve normality. This excluded 1.3% to 2.2% of cases  
53  
54 from each continuous variable. Due to a substantial proportion of cases with at least one  
55  
56 missing value in at least one covariable or exposure variable (22% to 28% depending on the  
57  
58  
59  
60

1  
2  
3 exposure variable) we performed multiple imputation. IBM SPSS v20 was used to conduct  
4  
5 the multiple imputation, missing values were imputed for all covariables and exposures, with  
6  
7 observed maximum and minimum values used as constraints. Outcome variables did not have  
8  
9 missing values imputed, but were included in the imputation models to predict missing values  
10  
11 in other variables. Linear regression was used as the type of imputation, and 5 cycles of  
12  
13 imputation were conducted resulting in 5 imputed datasets. Results from these 5 datasets  
14  
15 were combined using the multiple imputation module in SPSS to provide pooled results. The  
16  
17 imputed sample size is limited to the number of valid observations for each outcome variable  
18  
19 (2289 for accelerometry-measured ST, 2279 for TV time, 2253 for non-TV sitting time, and  
20  
21 1170 for occupational sitting time). Non-imputed results are presented in the appendix.  
22  
23  
24  
25  
26

### 27 *Statistical analysis*

28  
29  
30 Analyses were weighted for non-response to give a sample that was representative of adults  
31  
32 living in England. The associations between each of the socioeconomic indicators  
33  
34 (household income, social class, education, SEP score, and area deprivation,) and each  
35  
36 individual ST indicator (TV time, non-TV sitting time, occupational sitting/standing, and  
37  
38 accelerometry-measured ST) were examined using generalised linear models, and by multiple  
39  
40 linear regression to determine linear trend p values. Results are presented for the whole week,  
41  
42 the weekday/weekend day-specific results can be found in the online appendix. We also  
43  
44 repeated the SEP score analyses stratified by economic activity (employed/self-employed vs  
45  
46 non-economically active). SPSS version 21 was used for all analyses. For all multivariate  
47  
48 analyses we used the complex samples generalised linear models (GLM) procedure to take  
49  
50 into account the complex survey design. Different models were adjusted for: 1) age and sex;  
51  
52 2) additionally for BMI, limiting long standing illness, difficulty with usual activities, car  
53  
54 ownership, drinking frequency, smoking status, and other socioeconomic indicators  
55  
56  
57  
58  
59  
60

1  
2  
3 (household income, social class, area deprivation); 3) additionally for time spent in self-  
4 reported MVPA or accelerometry-measured MVPA as appropriate, and average  
5  
6  
7 accelerometer wear time on valid days. Models 2 and 3 with accelerometry-measured ST as  
8  
9 the outcome were also adjusted for average accelerometer wear time on each valid day. This  
10 work conforms with the STROBE statement for observational studies.<sup>27</sup>  
11  
12  
13

## 14 15 16 17 **Results**

### 18 19 *Descriptives*

20  
21  
22 2289 adults (1030 males) provided valid accelerometry data, with 2279 (1020 males) and  
23 2253 (1014 males) also providing self-reported TV and non-TV time respectively. 1170 (576  
24 males) provided occupational sitting/standing time. Table 1 presents the sample  
25 characteristics of the accelerometry sample by SEP score group (prior to MI) with casewise  
26 deletion of missing values (N=1651). In total 628 participants in the accelerometry sample  
27 had at least one covariate imputed. The variables with the most imputed values were  
28 household income (361 imputed) and BMI (233 imputed). Participants from lower SEP  
29 groups were more likely to be female, older, have a higher BMI, spend less time sedentary  
30 overall and sitting at work, but spend more time watching TV than individuals in higher SEP  
31 groups. Lower SEP individuals were also more likely to report a limiting longstanding illness  
32 and difficulties with usual daily activities, and be a current cigarette smoker, but less likely to  
33 be a heavy drinker and meet physical activity guidelines. The mean wear time on valid days  
34 was 831 minutes. The mean number of valid days (for those with at least 1 valid day) was  
35 6.0 days.  
36  
37  
38  
39  
40  
41  
42  
43  
44  
45  
46  
47  
48  
49  
50  
51  
52  
53  
54  
55  
56  
57  
58  
59  
60

**Table 1:** Sample Characteristics by Socioeconomic Position Score

|                                                                        | SEP Score Group            |               |                             | <i>p</i> |
|------------------------------------------------------------------------|----------------------------|---------------|-----------------------------|----------|
|                                                                        | 1 (lowest) & 2<br>(N=521)* | 3<br>(N=355)* | 4 & 5 (highest)<br>(N=775)* |          |
| <i>Categorical variables<sup>a</sup></i>                               |                            |               |                             |          |
| Sex (% male)                                                           | 40.1                       | 47.0          | 50.5                        | 0.001    |
| Limiting longstanding illness (%)                                      | 32.8                       | 24.5          | 16.8                        | <0.001   |
| Adherence to the physical activity guidelines (self-reported data) (%) | 32.6                       | 43.9          | 49.6                        | <0.001   |
| Difficulty in performing usual activities (%)                          | 21.5                       | 14.9          | 7.8                         | <0.001   |
| Car or van available (%)                                               | 73.9                       | 89.9          | 94.7                        | <0.001   |
| Drinking frequency (% ≥5 times /week)                                  | 15.9                       | 23.1          | 24.9                        | <0.001   |
| Smoking (% current)                                                    | 27.1                       | 23.9          | 15.5                        | <0.001   |
| Employment status (% employed/self-employed)                           | 35.2                       | 64.8          | 76.3                        | <0.001   |
| <i>Continuous variables<sup>b</sup></i>                                |                            |               |                             |          |
|                                                                        | M (SD)                     | M (SD)        | M (SD)                      | <i>P</i> |
| Age (years)                                                            | 56.1 (18.5)                | 50.4 (16.6)   | 46.9 (15.9)                 | <0.001   |
| BMI (kg/m <sup>2</sup> )                                               | 28.0 (4.9)                 | 27.4 (4.9)    | 26.8 (4.5)                  | <0.001   |
| Sedentary time (accelerometry data) (Minutes/day)                      | 505.6 (97.7)               | 499.4 (90.7)  | 528.7 (87.2)                | <0.001   |
| TV (Minutes/day)                                                       | 218.6 (117.3)              | 175.8 (97.7)  | 145.0 (74.7)                | <0.001   |
| Non-TV sitting time (Minutes/day)                                      | 128.1 (86.4)               | 121.5 (90.6)  | 133.2 (86.3)                | 0.110    |
| Occupational sitting/standing time (Minutes/day)                       | 151.8 (116.5)              | 173.5 (120.9) | 198.1 (121.9)               | <0.001   |
| MVPA time per day (accelerometry data) (Minutes/day)                   | 24.7 (24.1)                | 29.7 (26.3)   | 32.0 (25.1)                 | <0.001   |

\* Occupational sitting time SEP 1 N=152 SEP 2 N=214; SEP 3 N=549 for SEP 4 & 5

<sup>a</sup> Chi Square was used to test significance of association between categorical variables and social class

<sup>b</sup> Anova was used to test significance of association between continuous variables and social class

### *Composite Socioeconomic position and sedentary time*

Figure 1 presents the GLM estimated marginal means and their 95% CIs describing the associations between composite SEP score and each measure of ST. SEP was positively associated with accelerometry-measured ST and occupational sitting/standing time, and inversely associated with TV time in all models. There were no associations between SEP and non-TV sitting time. Adjustments for potential confounders made no material difference to all above associations. Figure 2 presents associations between SEP score and accelerometry-measured ST, stratified by employment status. SEP score was positively associated with accelerometry-measured ST for those in employment only. SEP was inversely associated with TV time regardless of employment status, while non-TV leisure-time sitting was positively associated with SEP (SEP1 coefficient 134, 95% CI 125 to 145; SEP5 coefficient 177, 155 to 198), but only for those not in employment. However this association was not linear (data not shown).

### *Equivalised Household income and sedentary time*

Figure 3 presents associations between household income and each measure of ST. Household income was positively associated with accelerometer-measured ST and occupational sitting time and these associations persisted following adjustments for MVPA and other confounders. Like with SEP score, household income was inversely associated with TV time, although this association was attenuated to the null following adjustments for potential confounders in models 2 and 3. Household income was not associated with non-TV sitting time.

### *Educational attainment and sedentary time*



1  
2  
3 Figure 4 presents the associations between the highest educational qualification and each  
4 measure of ST. Educational attainment was positively associated with accelerometry-  
5 measured ST and inversely associated with TV time in all models. Occupational  
6 sitting/standing time was inversely associated with education but the association did not  
7 appear to be linear (it was evident across the lowest three educational levels only) and was  
8 attenuated to the null following adjustments for potential confounders. There was a weak  
9 positive association between education and non-TV sitting time, following adjustments for  
10 potential confounders in models 2 and 3.  
11  
12  
13  
14  
15  
16  
17  
18  
19

#### 20 21 *Occupational social class and sedentary time*

22  
23  
24 As shown in Figure 5, occupational social class was positively associated with  
25 accelerometry-measured ST and occupational sitting/standing. The initial inverse association  
26 with TV time (model 1) was attenuated to the null following adjustments for potential  
27 confounders. Similarly to SEP score and income, social class was not associated with non-  
28 TV sitting time.  
29  
30  
31  
32  
33  
34

#### 35 36 *Area deprivation and sedentary time*

37  
38  
39 Area-level deprivation was positively associated with TV time (the lower the deprivation the  
40 lower the TV time) but these associations did not persist in the adjusted models (Figure 6).  
41  
42 Area deprivation was not associated with any other measures of ST (Figure 6).  
43  
44  
45  
46

#### 47 48 *Differential associations between imputed and non-imputed data*

49  
50 There were no differences between the imputed and non-imputed models describing the  
51 associations between SEP score and ST indicators, although the 95% confidence intervals  
52 were slightly broader in the unimputed models due to the lower sample size (see  
53  
54  
55  
56  
57  
58  
59  
60 supplementary Figure S2).

### *Differential associations in weekday Vs weekend days*

There was no consistent pattern of differences in the associations of SEP and ST by weekend vs weekday (see supplementary Figures S3 and S4), time of the week-specific results showed broadly the same pattern as the whole week. The only notable difference was that a direct association between SEP and non-TV sitting time was observed on weekend days, but not on weekdays.

### **Discussion**

Literature on the socio-economic gradient of sedentary behaviour is very limited and has relied on partial sedentary behaviour indicators, mostly TV viewing. To our knowledge, this study is the only one that considers four indicators of socioeconomic position in relation to four indicators of sedentary behaviour, allowing a much more in-depth examination of the associations of interest than in previous studies. Our study suggests that occupational ST is what drives the positive association between overall SEP and total ST as there was no association among those not in employment (Figure 2). The difference between the lowest and highest SEP groups (Figure 1) is in the region of 60-70 minutes per day for both total accelerometry-measured sedentary time and occupational sitting/standing time and this is comparable with the difference between the extreme SEP group among the economically active part of the sample (~90 minutes/day). As low SEP is more likely to involve fixed length shift-based work one possible explanation is that these occupational ST differences reflect the longer working hours of professionals in higher SEP groups, although we had no information on work times to examine this hypothesis or make statistical adjustments. Our findings agree with an Australian study<sup>19</sup> which found that among women, full-time work, skilled occupations, and university education were all associated with high (self-reported)

1  
2  
3 total sitting time. Our study also found that the inverse association between TV time and SEP  
4  
5 was significant regardless of employment status. In a study of Dutch workers, sitting time at  
6  
7 work varied considerably by type of occupation but not sitting during leisure time<sup>28</sup>.  
8  
9

10 Previous studies of adults in Belgium<sup>13</sup> and Australia<sup>14 15 29</sup> have reported inverse  
11  
12 associations between SEP indicators and TV time. We observed the same TV time pattern  
13  
14 with SEP score and education but not with occupational class, household income or area  
15  
16 deprivation. Although the occupational class and household income data were suggestive of  
17  
18 a weak association with TV time, our current results somehow contradict our study in  
19  
20 Scottish adults,<sup>12</sup> where all SEP indicators (occupational class, household income or area  
21  
22 deprivation) as well as the composite SEP score were associated with recreational screen time  
23  
24 (including TV time). Explanations for this might be that the Scottish study was three times  
25  
26 larger in size (which might have made it easier for data patterns to emerge) and the inclusion  
27  
28 of non-TV screen time as an outcome, although studies from other countries suggest no clear  
29  
30 pattern between non-TV recreational screen time (e.g. computer use) and SEP<sup>30 15</sup>.  
31  
32

33  
34 Nevertheless, both our English and the Scottish studies demonstrate that when education,  
35  
36 occupational social class and income are combined into a single measure (SEP score) they are  
37  
38 a much more powerful predictor of sedentary time than any single indicator, perhaps because  
39  
40 they collectively capture actual socioeconomic position more thoroughly than any single  
41  
42 indicator. Composite SEP score showed a clear and consistent pattern with all ST outcomes,  
43  
44 although each of the individual/household-level SEP indicators seemed to influence each ST  
45  
46 outcome in various ways, suggesting there are complex, interacting, multi-dimensional  
47  
48 influences of SEP on ST. Accelerometry-measured ST was the only sedentary behaviour  
49  
50 variable that showed clear and consistent (positive) associations with all SEP variables  
51  
52 (except from area-level deprivation). Although the cross-sectional design of this study  
53  
54 precludes causal inferences, the pattern of the accelerometry-based associations we observed  
55  
56  
57  
58  
59  
60

1  
2  
3 suggests that it is unlikely that total sedentary behaviour contributes to the well-documented  
4  
5 socioeconomic inequalities in health.<sup>11</sup>  
6  
7  
8  
9

10  
11 Strengths of our study include the availability of both objectively-measured and self-reported  
12 indicators of sedentary behaviour which allowed us to be more thorough and detailed when  
13 examining the associations of interest. Accelerometers can capture total sedentary time more  
14 comprehensively than any partial self-reported indicator and as such are able to better  
15 quantify the socioeconomic gradient of ST as a contributor to health inequalities, however a  
16 limitation is that accelerometers do not distinguish between sitting and standing which have  
17 different health implications, this also applies to occupational sitting/standing time. It has  
18 been argued that standing should not be considered a sedentary behaviour<sup>31</sup>. This limitation  
19 is also pertinent to the self-reported ST assessment as standing time was included in the  
20 occupational ST question. The lack of information on work times did not allow us to  
21 examine the possibility that ST differences between SEP groups are partly due to longer  
22 work hours in higher SEP groups. Taken together, these limitations of the measurements  
23 may, to some extent, have confounded the associations of SEP with total and occupational ST  
24 we reported. Another limitation is that our study was limited to the accelerometry sample of  
25 HSE 2008 and this might have led to our sample being less representative of the target  
26 population. Although those in the subsample offered the accelerometer were older and more  
27 likely to be retired and to be less healthy than the rest of the adult Health Survey for England  
28 sample, those who refused to wear an accelerometer were similar in terms of employment  
29 status and area-level deprivation compared to those who wore the accelerometers for at least  
30 four days a week<sup>32</sup>. Higher SEP is linked to higher commuting by car<sup>33</sup> and this may partly  
31 explain the socioeconomic gradient but our data are limited in that there was no specific  
32 question on commuting-related sitting to examine this explanation.  
33  
34  
35  
36  
37  
38  
39  
40  
41  
42  
43  
44  
45  
46  
47  
48  
49  
50  
51  
52  
53  
54  
55  
56  
57  
58  
59  
60

## Conclusions

Objectively-measured total sedentary time and occupational sedentary time are higher among economically active English adults in higher socioeconomic groups compared to less privileged groups. However, TV viewing is lower in higher socioeconomic groups regardless of economic activity. Combining different socioeconomic indicators appears to have composite power as a predictor of sedentary time.

**Funding:** This work was funded by the National Institute for Health Research through a Career Development Fellowship (ES). NC is also funded by the National Institute for Health Research through the same source. The views expressed in this article are those of the authors and not the English Department of Health or the National Institute for Health Research.

**Data Sharing:** No additional data are available

**Competing interests:** None of the authors have any competing interests to declare

**Authors' Contributions:** All authors have contributed sufficiently, ES conceived the idea, prepared the dataset, drafted most of the manuscript and revised the manuscript several times. NC did the statistical analysis under the supervision of ES and prepared the Tables, Figures and Supplemental Online material. AR processed the accelerometry files. NS, MH and AR redrafted parts of the manuscript and critically evaluated the whole material. All authors approved the final version before submission.

1  
2  
3  
4  
5  
6  
7  
8  
9  
10  
11  
12  
13  
14  
15  
16  
17  
18  
19  
20  
21  
22  
23  
24  
25  
26  
27  
28  
29  
30  
31  
32  
33  
34  
35  
36  
37  
38  
39  
40  
41  
42  
43  
44  
45  
46  
47  
48  
49  
50  
51  
52  
53  
54  
55  
56  
57  
58  
59  
60

For peer review only

## References

1. Pate RR, O'Neill JR, Lobelo F. The evolving definition of "sedentary". *Exercise and Sport Sciences Reviews* 2008;**36**(4):173-78.
2. Katzmarzyk PT, Church TS, Craig CL, et al. Sitting Time and Mortality from All Causes, Cardiovascular Disease, and Cancer. *Med Sci Sports Exerc* 2009;**41**(5):998-1005.
3. Matthews C, George SM, Moore SC, et al. Amount of time spent in sedentary behaviors and cause-specific mortality in US adults. *Am J Clin Nutr* 2012;**95**(2):437-45.
4. Patel AV, Bernstein L, Deka A, et al. Leisure Time Spent Sitting in Relation to Total Mortality in a Prospective Cohort of US Adults. *Am J Epidemiol* 2010;**172**(4):419-29.
5. van der Ploeg HP, Chey T, Korda RJ, et al. Sitting Time and All-Cause Mortality Risk in 222 497 Australian Adults. *Arch Intern Med* 2012;**172**(6):494-500.
6. Grøntved A, Hu FB. Television Viewing and Risk of Type 2 Diabetes, Cardiovascular Disease, and All-Cause Mortality. *JAMA* 2011;**305**(23):2448-55.
7. Joint Health Surveys Unit. The Health Survey for England 2008. Volume 1 Leeds, 2010:21-206.
8. Joint Health Surveys Unit. The Health Survey for England 2008, Volume 2. Leeds: , 2010:11.
9. Marmot MG, Shipley MJ, Hemingway H, et al. Biological and behavioural explanations of social inequalities in coronary heart disease: Whitehall II Study. *Diabetologia* 2008;**51**(11):1980-88.
10. Williams ED, Tapp RJ, Magliano DJ, et al. Health behaviours, socioeconomic status and diabetes incidence: the Australian Diabetes Obesity and Lifestyle Study (AusDiab). *Diabetologia* 2010;**53**:2538-45.
11. Stringhini S, Sabia S, Shipley M, et al. Association of Socioeconomic Position With Health Behaviors and Mortality. *JAMA* 2010;**303**(12):1159-66.
12. Stamatakis E, Hillsdon M, Mishra G, et al. Television viewing and other screen-based entertainment in relation to multiple socioeconomic status indicators and area deprivation: the Scottish Health Survey 2003. *Journal of epidemiology and community health* 2009;**63**(9):734-40.
13. Van Dyck D, Cardon G, Deforche B, et al. Socio-demographic, psychosocial and home-environmental attributes associated with adults' domestic screen time. *BMC Public Health* 2011;**11**:668.
14. Teychenne M, Ball K, Salmon J. Correlates of socio-economic inequalities in women's television viewing: a study of intrapersonal, social and environmental mediators. *Int J Behav Nutr Phy Act* 2012;**9**:3.
15. Burton NW, Haynes M, van Uffelen JGZ, et al. Mid-Aged Adults' Sitting Time in Three Contexts. *Am J Prev Med* 2012;**42**(4):363-73.
16. Bowman SA. Television-viewing characteristics of adults: correlations to eating practices and overweight and health status. *Preventing Chronic Disease* 2006;**3**(2).
17. Stamatakis E, Hamer M, Tilling K, et al. Sedentary time in relation to cardio-metabolic risk factors: differential associations for self-report vs accelerometry in working age adults. *Int J Epidemiol* 2012;**41**:1328-37.
18. Clark BK, Healy GN, Winkler EAH, et al. Relationship of Television Time with Accelerometer-Derived Sedentary Time: NHANES *Med Sci Sports Exerc* 2011;**43**(5):822-28.
19. van Uffelen JGZ, Heesch KC, Brown W. Correlates of Sitting Time in Working Age Australian Women: Who Should Be Targeted With Interventions to Decrease Sitting Time? *J Phys Act Health* 2012;**9**(2):270-87.
20. Santos R, Soares-Miranda L, Vale S, et al. Sitting time and body mass index, in a portuguese sample of men: Results from the azorean physical activity and health study (APAHS). *Int J Environ Res Publ Health* 2010;**7**(4):1500-07.
21. Duncan MJ, HBadland HM, Mummery WK. Physical Activity Levels by Occupational Category in Non-Metropolitan Australian Adults. *J Phys Act Health* 2010;**7**(6):718-23.

- 1  
2  
3 22. Matthews CE, Chen KY, Freedson PS, et al. Amount of time spent in sedentary behaviors in the  
4 united states, 2003-2004. *Am J Epidemiol* 2008;**167**(7):875-81.
- 5 23. Stamatakis E, Ekelund U, Wareham N. Temporal trends in physical activity in England. The Health  
6 Survey for England 1991 to 2004. . *Prev Med* 2007;**45**:416-23.
- 7 24. Stamatakis E, Chaudhury M. Temporal trends in adults' sports participation patterns in England  
8 between 1997 and 2006: the Health Survey Br *J Sports Med* 2008;**42**:601-08.
- 9 25. Scholes S, Coombs N, Pedisic Z, et al. Age- and sex-specific criterion validity of the health survey  
10 for England physical activity and sedentary behavior assessment questionnaire as compared  
11 with accelerometry. *Am J Epidemiol* 2014;**179**(12):1493-502.
- 12 26. Troiano RP, Berrigan D, Dodd KW, et al. Physical activity in the United States measured by  
13 accelerometer. *Med Sci Sports Exerc* 2008;**40**(1):181-8.
- 14 27. Gallo V, Egger M, McCormack V, et al. STrengthening the Reporting of OBservational studies in  
15 Epidemiology--Molecular Epidemiology (STROBE-ME): an extension of the STROBE  
16 Statement. *PLoS medicine* 2011;**8**(10):e1001117.
- 17 28. Jans M, Proper K, Hildebrandt V. Sedentary Behavior in Dutch Workers: Differences between  
18 Occupations and Business Sectors. *Am J Prev Med* 2007;**33**:450-54.
- 19 29. Stamatakis E, Grunseit AC, Coombs N, et al. Associations between socio-economic position and  
20 sedentary behaviour in a large population sample of Australian middle and older-aged  
21 adults: The Social, Economic, and Environmental Factor (SEEF) Study. *Prev Med* 2014;**63c**:72-  
22 80.
- 23 30. Rhodes RE, Mark RS, Temmel CP. Adult Sedentary Behavior A Systematic Review. *Am J Prev Med*  
24 2012;**42**(3):E3-E28.
- 25 31. Yates T, Wilmot EG, Khunti K, et al. Stand up for your health: Is it time to rethink the physical  
26 activity paradigm? *Diabetes Research and Clinical Practice* 2011;**93**(2):292-94.
- 27 32. Roth M, Mindell J. Who provides accelerometry data? Correlates of adherence to wearing an  
28 accelerometry motion sensor: the 2008 health survey for England. *J Phys Act Health*  
29 2013;**10**(1):70-78.
- 30 33. Goodman A, Guell C, Panter J, et al. Healthy travel and the socio-economic structure of car  
31 commuting in Cambridge, UK: A mixed-methods analysis. *Social Science & Medicine*  
32 2012;**74**(12):1929-38.
- 33  
34  
35  
36  
37  
38  
39  
40  
41  
42  
43  
44  
45  
46  
47  
48  
49  
50  
51  
52  
53  
54  
55  
56  
57  
58  
59  
60



## Figure Legends and footnotes

### Figure 1: Multivariate-adjusted average daily sedentary time by SEP score

Model 1: adjusted for age and sex; model 2: further adjustments for area deprivation, BM, limiting long standing illness, difficulty with usual activities, car ownership, drinking frequency, and smoking status; model 3: further adjustments for self-reported time spent in MVPA, accelerometry-measured MVPA time, and average accelerometer wear time on valid days. Models with accelerometer sedentary time as the outcome were also adjusted for average accelerometer wear time on valid days.

a Coefficients represent estimated marginal means from generalised linear models, with 95% confidence intervals. Linear trend p values were obtained from linear regression.

b SEP1 indicates most deprived, SEP 5 indicates least deprived

c Any paid work in the last four weeks.

### Figure 2: Multivariate-adjusted accelerometer-measured sedentary time by SEP Score for individuals stratified by employment status.

Model 1: adjusted for age and sex; model 2: further adjustments for area deprivation, BM, limiting long standing illness, difficulty with usual activities, car ownership, drinking frequency, and smoking status; model 3: further adjustments for self-reported time spent in MVPA, accelerometry-measured MVPA time, and average accelerometer wear time on valid days. Models with accelerometer sedentary time as the outcome were also adjusted for average accelerometer wear time on valid days.

a Coefficients represent estimated marginal means from generalised linear models, with 95% confidence intervals. Linear trend p values were obtained from linear regression.

b SEP1 indicates most deprived, SEP 5 indicates least deprived

c Any paid work in the last four weeks.

### Figure 3: Multivariate-adjusted average daily sedentary time by household income quartile

Model 1: adjusted for age and sex; model 2: further adjustments for area deprivation, BM, limiting long standing illness, difficulty with usual activities, car ownership, drinking frequency, and smoking status; model 3: further adjustments for self-reported time spent in MVPA, accelerometry-measured MVPA time, and average accelerometer wear time on valid days. Models with accelerometer sedentary time as the outcome were also adjusted for average accelerometer wear time on valid days.

a Coefficients represent estimated marginal means from generalised linear models, with 95% confidence intervals. Linear trend p values were obtained from linear regression.

b Q1 indicates lowest income quartile ( $\leq$ £13876), Q4 indicates the highest income quartile ( $\geq$ £39001).

### Figure 4: Multivariate-adjusted difference average daily sedentary time by highest qualification

Model 1: adjusted for age and sex; model 2: further adjustments for area deprivation, BM, limiting long standing illness, difficulty with usual activities, car ownership, drinking frequency, and smoking status; model 3: further adjustments for self-reported time spent in MVPA, accelerometry-measured MVPA time, and average

1  
2  
3 accelerometer wear time on valid days. Models with accelerometer sedentary time as the outcome were also  
4 adjusted for average accelerometer wear time on valid days.

5 a Coefficients represent estimated marginal means from generalised linear models, with 95% confidence  
6 intervals. Linear trend p values were obtained from linear regression.

7 b Education Level 1 represents NVQ1/CSE and NVQ2 GCE O Level equivalent; Level 2 represents

8 NVQ3/GCE A Level equivalent; Level 3 represents higher education below Degree and NVQ4/NVQ5/Degree

9  
10 or higher.  
11

12  
13 **Figure 5:** Multivariate-adjusted average daily sedentary time<sup>a</sup> by occupational social class.  
14

15  
16 Model 1: adjusted for age and sex; model 2: further adjustments for area deprivation, BM, limiting long  
17 standing illness, difficulty with usual activities, car ownership, drinking frequency, and smoking status; model  
18 3: further adjustments for self-reported time spent in MVPA, accelerometry-measured MVPA time, and average  
19 accelerometer wear time on valid days. Models with accelerometer sedentary time as the outcome were also  
20 adjusted for average accelerometer wear time on valid days.

21 a Coefficients represent estimated marginal means from generalised linear models, with 95% confidence  
22 intervals. Linear trend p values were obtained from linear regression.  
23  
24

25 **Figure 6:** Multivariate-adjusted sedentary time by area deprivation quintile.  
26

27  
28 Model 1: adjusted for age and sex; model 2: further adjustments for area deprivation, BM, limiting long  
29 standing illness, difficulty with usual activities, car ownership, drinking frequency, and smoking status; model  
30 3: further adjustments for self-reported time spent in MVPA, accelerometry-measured MVPA time, and average  
31 accelerometer wear time on valid days. Models with accelerometer sedentary time as the outcome were also  
32 adjusted for average accelerometer wear time on valid days.

33 a Coefficients represent estimated marginal means from generalised linear models, with 95% confidence  
34 intervals. Linear trend p values were obtained from linear regression.

35 b Q1 indicates most deprived, Q5 indicates least deprived  
36  
37  
38  
39  
40  
41  
42  
43  
44  
45  
46  
47  
48  
49  
50  
51  
52  
53  
54  
55  
56  
57  
58  
59  
60

1  
2  
3  
4  
5 **Title:** Objectively-assessed and self-reported sedentary time in relation to multiple  
6 socioeconomic status indicators among adults in England  
7  
8

9 **Running title:** Sedentary time and socioeconomic status  
10

11 **Authors:** Emmanuel Stamatakis<sup>1 2 3</sup>, Ngaire Coombs<sup>3 4</sup>, Alex Rowlands<sup>5</sup>, Nicola Shelton<sup>3</sup>,  
12 Melvyn Hillsdon<sup>6</sup>.  
13  
14

15  
16 <sup>1</sup>Charles Perkins Centre, University of Sydney, Australia  
17

18 <sup>2</sup>Discipline of Exercise and Sport Sciences, Faculty of Health Sciences, University of  
19 Sydney, Sydney, Australia  
20  
21

22 <sup>3</sup>PARG (Physical Activity Research Group), Department of Epidemiology and Public Health,  
23 University College London, London, UK  
24  
25

26 <sup>4</sup>Department of Social Sciences, University of Southampton, UK  
27  
28

29 <sup>5</sup>Division of Health Sciences, University of South Australia, Australia  
30  
31

32 <sup>6</sup>Sport and Health Sciences, College of Life and Environmental Sciences, University of  
33 Exeter, UK  
34  
35  
36  
37  
38

39 Correspondence: Emmanuel Stamatakis, Charles Perkins Centre, University of Sydney ,  
40 Johns Hopkins Drive, Sydney, NSW 2050, Australia. Email:  
41 [emmanuel.stamatakis@sydney.edu.au](mailto:emmanuel.stamatakis@sydney.edu.au), Telephone: +61 293519668.  
42  
43  
44  
45  
46

47 **Wordcount:**  
48

49 Abstract: 245 words  
50  
51

52 Main text: 3693 words  
53  
54  
55  
56  
57  
58  
59  
60

## Abstract

**Objectives:** To examine the associations between socioeconomic position (SEP) and multi-domain self-reported and objectively-assessed sedentary time (ST). **Design:** cross-sectional; **Setting:** general population households in England. **Participants:** 2289 adults aged 16-96 years who participated in the 2008 Health Survey for England. **Outcomes:** accelerometer-measured sedentary time, and self-reported television time, non-television leisure-time sitting and occupational sitting/standing. We examined multivariable associations between household income, social class, education, area deprivation **for** each SEP indicator (including a 5-point composite SEP score computed by aggregating individual SEP indicators) and each ST indicator using generalised linear models. **Results:** Accelerometry-measured total ST and occupational sitting/standing were positively associated with SEP score and most of its constituent SEP indicators, while television time was negatively associated with SEP score and education level. Area-level deprivation was largely unrelated to ST. Those in the lowest composite SEP group spent 64 (95% CIs: 52 to 76) and 72 (48 to 98), fewer minutes/day in total ST and occupational sitting/standing compared to those in the top SEP group, and an additional 48 (35 to 60) minutes/day watching television ( $p < 0.001$  for linear trend). Stratified analyses showed that these associations between composite SEP score and total ST were evident only among participants who were in employment. **Conclusions:** Occupational sitting seems to drive the positive association between socioeconomic position and total sedentary time. Lower socioeconomic position is linked to higher TV viewing times.

## Article summary

1  
2  
3 *Strengths and limitations of this study:*  
4  
5

- 6 • First study of its kind to use objective sedentary behaviour measurements
- 7
- 8 • Broad range of self-reported sedentary behaviour types
- 9
- 10 • Broad set of socioeconomic status markers including area-level deprivation
- 11
- 12
- 13 • This is a cross-sectional design
- 14
- 15 • The occupational sedentary time question and accelerometry cannot
- 16
- 17 differentiate between sitting and standing
- 18
- 19
- 20
- 21
- 22
- 23

24 **Keywords**

25  
26 Socioeconomic status; television; sedentary behaviour; inequality; physical activity;  
27  
28 accelerometer;  
29  
30  
31  
32  
33  
34  
35  
36  
37  
38  
39  
40  
41  
42  
43  
44  
45  
46  
47  
48  
49  
50  
51  
52  
53  
54  
55  
56  
57  
58  
59  
60

## Introduction

Recent studies show that sedentary time (defined as an energy expenditure rate below 1.5 metabolic equivalents<sup>1</sup>, often characterised by activities involving sitting) is linked to increased all-cause<sup>2-5</sup> and cardiovascular<sup>2,3</sup> mortality risk independently of leisure-time physical activity participation. Television viewing, one of the most common sedentary time (ST) activities, has been specifically linked to all-cause and cardiovascular mortality and type 2 diabetes<sup>6</sup>. Objective data show that adults in England spend approximately nine to 10 hours a day being sedentary on average, out of which approximately 4 hours/day is TV watching<sup>7,8</sup>. Assuming that the average waking day lasts for 16 hrs, total sedentary time accounts for some 55-65% of total waking time. For working age adults a substantial proportion of total sedentary time takes place while at work, 56% of working English men and 50% of women report more than 5 hrs /day being sedentary while at work<sup>7</sup>.

Socioeconomic position (SEP) is a broad term that encompasses a range of characteristics, including occupational type and employment status, purchasing capacity and ownership, educational level and deprivation. Accordingly, there are several SEP indices each of which measures different aspects of social standing. Overall, SEP is a strong predictor of premature mortality and chronic disease occurrence including cardiovascular disease (CVD)<sup>9</sup> and diabetes<sup>10</sup> with individuals in lower SEP being considerably more likely to fall ill and die prematurely. Although there is no consensus on the origins of the socioeconomic gradient in health, one of the suggested pathways involves higher prevalence of poor health behaviours (e.g. physical inactivity and smoking) among lower socioeconomic groups<sup>11</sup>.

We have previously shown that lower SEP is linked consistently with increased TV viewing and other recreational screen time in Scottish adults<sup>12</sup>, a finding that has been confirmed by studies in other countries such as Belgium<sup>12,13</sup>, Australia<sup>14,15</sup>, and the US<sup>16</sup> that used TV as a

1  
2  
3 proxy for ST. However, these findings are not necessarily generalizable to overall sedentary  
4  
5 or sitting time because TV viewing is a complex exposure that seems to be a poor index of  
6  
7 overall ST<sup>17</sup>. In a recent study comparing associations between TV time and objectively  
8  
9 measured sedentary time, associations were of fair magnitude, but were not consistent across  
10  
11 population sub-groups<sup>18</sup>. The results of the few studies that looked at overall (self-reported)  
12  
13 sitting in relation to SEP are inconsistent. Higher social position was linked to higher overall  
14  
15 sitting time among Australian women<sup>19</sup> but education level was unrelated to sitting time  
16  
17 among Portuguese adults<sup>20</sup>. Objective measuring methodologies such as accelerometers and  
18  
19 inclinometers can give more comprehensive and complete estimates of total sedentary  
20  
21 behaviour than partial self-reported indices such as TV viewing, or self-reported total sitting  
22  
23 time, which may be more difficult to recall than TV viewing and therefore be subject to more  
24  
25 measurement error. Besides, SEP characteristics that relate to occupational class and income  
26  
27 will naturally have an impact on work time sitting. For example, manual unskilled workers  
28  
29 normally spend less time sitting during work than professionals in managerial office-based  
30  
31 jobs<sup>21</sup>. Similarly, higher incomes and the associated spending capacity might impact on the  
32  
33 time spent sitting driving a car or commuting. To our knowledge, no study has looked at the  
34  
35 associations between SEP defined using education, occupational class, income and area  
36  
37 deprivation indices, and SB estimated using self-reported sitting across different domains as  
38  
39 well as objective methods.  
40  
41  
42  
43  
44

45  
46 The aim of this study was to look at the associations between multiple SEP indicators and  
47  
48 self-reported indices of sitting time and SB as well as objectively-assessed total SB time. We  
49  
50 used data from one of the largest European accelerometry general population studies, the  
51  
52 2008 Health Survey for England.  
53  
54

## 55 56 **Methods** 57 58 59 60

### ***Study Sample***

The Health Survey for England (HSE) is a repeated nationally representative study of individuals living in private households in England. We drew our sample from the 2008 HSE which had a special focus on physical activity and sedentary behaviour. The sample is drawn using multi-stage stratified probability sampling with postcode sectors as the primary sampling unit. More details of the sample design are available elsewhere<sup>8</sup>. The overall interview household response rate for the main sample of 15,102 adults was 64%, and for the accelerometer sub-sample of 4,507 adults was 73%<sup>8</sup>. In this analysis we included adults aged 16 and over (age range 16-96 years) who had both valid accelerometry and self-reported SB data. Participants provided written informed consent. An abridged methods section is presented here: the full methods section with more information can be found in supplementary file S1 (Unabridged Methods). Ethical approval was obtained from the Oxford Research Ethics Committee (reference number 07/H0604/102).

### ***Demographics and contextual variables***

Trained fieldworkers assessed participants' demographics, self-rated health, long standing illness, alcohol consumption and smoking using Computer Assisted Personal Interviewing. Height was measured using a standard stadiometer with a sliding head plate, a base plate and three connecting rods marked with a metric measuring scale. Participants were asked to remove their shoes. One measurement was taken, with the participant stretching to the maximum height. Weight was measured using Tanita electronic scales with a digital display (Tanita Corporation, Japan). Participants were asked to remove their shoes and any bulky clothing and a single measurement was recorded to the nearest 100g.<sup>7</sup> Body mass index (BMI) was computed as weight (kilograms) divided by squared height (metres).



### *Socioeconomic position measures*

Social class (of the household reference person) was determined by asking questions on participants' occupation and using the Registrar General's classification to -grouped them as I&II (professional and managerial/technical), III Non-manual, III manual, IV&V (semi-skilled manual and unskilled manual). Equivalised household income was grouped into quintiles. Highest education qualification was coded as no qualification and three levels: Level 1 represents secondary school or below (NVQ1/CSE and NVQ2/GCE O Level equivalent); Level 2 represents post-compulsory secondary school (NVQ3/GCE A Level equivalent) and Level 3 represents higher education (higher education below Degree and NVQ4/NVQ5/Degree or higher). Area deprivation was assessed using the 2004 Index of Multiple Deprivation (IMD), a continuous score that we grouped into quintiles (1 representing the most deprived quintile, and 5 representing the least deprived).

### *Sedentary time and physical activity measures*

A random sub-sample of HSE 2008 participants were selected to wear a uniaxial accelerometer (Actigraph model GT1M, Pensacola, Florida) during waking hours for seven consecutive days. Consistent with previous epidemiological SB studies<sup>22</sup>, the sampling epoch was one minute and non-wear time was defined as periods of at least 60 consecutive minutes of zero minutely counts, with allowance for up to 2 consecutive minutes of 1–100 counts/minute. For a day to be 'valid' for inclusion in the analyses, participants had to have worn the accelerometer for a minimum of 600 minutes. Participants with at least one day of valid wear were included in these analyses.<sup>22</sup>

1  
2  
3 Self-reported sedentary time was assessed using a set of questions on the usual  
4 week/weekend day in the last four weeks prior to the interview time spent on: a) TV  
5 (including DVDs and videos) viewing; and b) any other sitting during non-work times,  
6 including reading and computer use. For those participants who were economically active  
7 another set of questions assessed the average daily times spent sitting or standing while at  
8 work<sup>17</sup>. While it is not ideal to include standing as a measure of sedentary time, it is often  
9 necessitated by the unavailability of sitting-specific data, and standing is routinely included in  
10 objectively measured sedentary data as accelerometers are unable to differentiate between  
11 time spent sitting or standing. Like previously<sup>17</sup> for the purposes of this study standing will  
12 be considered a measure of sedentary behaviour.  
13  
14  
15  
16  
17  
18  
19  
20  
21  
22  
23  
24

25  
26 Physical activity questions included frequency (number of days in the last 4 weeks) and  
27 duration (minutes per day) of participation in walking for any purpose, domestic physical  
28 activity<sup>12,23</sup>, and any recreational sports and exercise including cycling for any purpose<sup>24</sup>.

29  
30  
31 Both the physical activity and the SB questions have been validated against accelerometry.<sup>25</sup>  
32  
33  
34

### 35 36 ***Data handling/Statistical analysis***

#### 37 38 *Regrouping the Socioeconomic position variables*

39  
40 Due to small numbers of observations, the top and bottom two categories of social class were  
41 collapsed, resulting in four categories: unskilled /semi-skilled manual; skilled manual; skilled  
42 non-manual; and managerial/technical/ professional. Using existing methods<sup>12</sup>, we derived a  
43 composite Socioeconomic Position (SEP) score using household income, individual  
44 education, and occupational social class of the head of household. The lowest category of  
45 each component variable was assigned a SEP score of 0, with the highest category given a  
46 SEP score of 4. The scores for each individual SEP indicator were then aggregated, resulting  
47 in a SEP score ranging from 0 to 12. Due to small numbers of observations in the high end of  
48  
49  
50  
51  
52  
53  
54  
55  
56  
57  
58  
59  
60

1  
2  
3 the score, the top SEP score was collapsed into five categories of comparable sample size:  
4  
5 SEP1 consisted of the lowest two SEP categories (0 and 1), SEP2 comprised categories 2 and  
6  
7 3, SEP3 comprised categories 4 and 5, SEP4 comprised categories 6 and 7, and SEP5  
8  
9 comprised of categories 8 and 9 (the highest observed SEP category).  
10  
11

### 12 *Deriving sedentary time and physical activity variables*

13  
14  
15 Week- and weekend day-specific TV and non-TV leisure time sitting were converted to all-  
16  
17 week time (minutes) using the following formula: (weekday time  $\times$  5) + (weekend day time  $\times$   
18  
19 2) / 7. Occupational sitting/standing time (minutes) per day was calculated by multiplying the  
20  
21 number of days worked per week by the average time spent sitting/standing at work on a  
22  
23 work day, and dividing by 7. Weekly self-reported MVPA hours/week were calculated as  
24  
25 number of days of participation multiplied by time per day in each activity type<sup>7,8</sup> Due to the  
26  
27 large number of participants and the very skewed distribution, self-reported MVPA was  
28  
29 categorised in to none, less than 30 minutes, 30 minutes to 1 hour, 1 to 2 hours, and more  
30  
31 than 2 hours of MVPA per day. For the accelerometry data we used 0-99 counts/minute to  
32  
33 denote sedentary ( $<1.5$  MET)<sup>3</sup> and  $\geq 2,020$  counts/minute to denote MVPA ( $>3$  MET)<sup>26</sup>.  
34  
35

36  
37 Accelerometry-measured variables were converted to time (minutes) per valid day and daily  
38  
39 ST time was calculated as the sum of the average ST minutes per valid day divided by the  
40  
41 number of valid days.  
42  
43  
44  
45

### 46 *Missing data and multiple imputation*

47  
48 Outliers outside 3 standard deviations of the mean for all continuous variables apart from age  
49  
50 were removed from the analyses to improve normality. This excluded 1.3% to 2.2% of cases  
51  
52 from each continuous variable. Due to a substantial proportion of cases with at least one  
53  
54 missing value in at least one covariable or exposure variable (22% to 28% depending on the  
55  
56  
57  
58  
59  
60

1  
2  
3 exposure variable) we performed multiple imputation. IBM SPSS v20 was used to conduct  
4  
5 the multiple imputation, missing values were imputed for all covariables and exposures, with  
6  
7 observed maximum and minimum values used as constraints. Outcome variables did not have  
8  
9 missing values imputed, but were included in the imputation models to predict missing values  
10  
11 in other variables. Linear regression was used as the type of imputation, and 5 cycles of  
12  
13 imputation were conducted resulting in 5 imputed datasets. Results from these 5 datasets  
14  
15 were combined using the multiple imputation module in SPSS to provide pooled results. The  
16  
17 imputed sample size is limited to the number of valid observations for each outcome variable  
18  
19 (2289 for accelerometry-measured ST, 2279 for TV time, 2253 for non-TV sitting time, and  
20  
21 1170 for occupational sitting time). Non-imputed results are presented in the appendix.  
22  
23  
24  
25  
26

### 27 *Statistical analysis*

28  
29  
30 Analyses were weighted for non-response to give a sample that was representative of adults  
31  
32 living in England. The associations between each of the socioeconomic indicators  
33  
34 (household income, social class, education, SEP score, and area deprivation,) and each  
35  
36 individual ST indicator (TV time, non-TV sitting time, occupational sitting/standing, and  
37  
38 accelerometry-measured ST) were examined using generalised linear models, and by multiple  
39  
40 linear regression to determine linear trend p values. Results are presented for the whole week,  
41  
42 the weekday/weekend day-specific results can be found in the online appendix. We also  
43  
44 repeated the SEP score analyses stratified by economic activity (employed/self-employed vs  
45  
46 non-economically active). SPSS version 21 was used for all analyses. For all multivariate  
47  
48 analyses we used the complex samples generalised linear models (GLM) procedure to take  
49  
50 into account the complex survey design. Different models were adjusted for: 1) age and sex;  
51  
52 2) additionally for BMI, limiting long standing illness, difficulty with usual activities, car  
53  
54 ownership, drinking frequency, smoking status, and other socioeconomic indicators  
55  
56  
57  
58  
59  
60

1  
2  
3 (household income, social class, area deprivation); 3) additionally for time spent in self-  
4  
5 reported MVPA or accelerometry-measured MVPA as appropriate, and average  
6  
7 accelerometer wear time on valid days. Models 2 and 3 with accelerometry-measured ST as  
8  
9 the outcome were also adjusted for average accelerometer wear time on each valid day. This  
10  
11 work conforms with the STROBE statement for observational studies.<sup>27</sup>  
12  
13

## 14 15 16 17 **Results**

### 18 19 *Descriptives*

20  
21  
22  
23 2289 adults (1030 males) provided valid accelerometry data, with 2279 (1020 males) and  
24  
25 2253 (1014 males) also providing self-reported TV and non-TV time respectively. 1170 (576  
26  
27 males) provided occupational sitting/standing time. Table 1 presents the sample  
28  
29 characteristics of the accelerometry sample by SEP score group (prior to MI) with casewise  
30  
31 deletion of missing values (N=1651). In total 628 participants in the accelerometry sample  
32  
33 had at least one covariate imputed. The variables with the most imputed values were  
34  
35 household income (361 imputed) and BMI (233 imputed). Participants from lower SEP  
36  
37 groups were more likely to be female, older, have a higher BMI, spend less time sedentary  
38  
39 overall and sitting at work, but spend more time watching TV than individuals in higher SEP  
40  
41 groups. Lower SEP individuals were also more likely to report a limiting longstanding illness  
42  
43 and difficulties with usual daily activities, and be a current cigarette smoker, but less likely to  
44  
45 be a heavy drinker and meet physical activity guidelines. The mean wear time on valid days  
46  
47 was 831 minutes. The mean number of valid days (for those with at least 1 valid day) was  
48  
49 6.0 days.  
50  
51  
52  
53  
54  
55  
56  
57  
58  
59  
60

**Table 1:** Sample Characteristics by Socioeconomic Position Score

|                                                                        | SEP Score Group            |               |                             | <i>p</i> |
|------------------------------------------------------------------------|----------------------------|---------------|-----------------------------|----------|
|                                                                        | 1 (lowest) & 2<br>(N=521)* | 3<br>(N=355)* | 4 & 5 (highest)<br>(N=775)* |          |
| <i>Categorical variables<sup>a</sup></i>                               |                            |               |                             |          |
| Sex (% male)                                                           | 40.1                       | 47.0          | 50.5                        | 0.001    |
| Limiting longstanding illness (%)                                      | 32.8                       | 24.5          | 16.8                        | <0.001   |
| Adherence to the physical activity guidelines (self-reported data) (%) | 32.6                       | 43.9          | 49.6                        | <0.001   |
| Difficulty in performing usual activities (%)                          | 21.5                       | 14.9          | 7.8                         | <0.001   |
| Car or van available (%)                                               | 73.9                       | 89.9          | 94.7                        | <0.001   |
| Drinking frequency (% ≥5 times /week)                                  | 15.9                       | 23.1          | 24.9                        | <0.001   |
| Smoking (% current)                                                    | 27.1                       | 23.9          | 15.5                        | <0.001   |
| Employment status (% employed/self-employed)                           | 35.2                       | 64.8          | 76.3                        | <0.001   |
| <i>Continuous variables<sup>b</sup></i>                                |                            |               |                             |          |
|                                                                        | M (SD)                     | M (SD)        | M (SD)                      | <i>P</i> |
| Age (years)                                                            | 56.1 (18.5)                | 50.4 (16.6)   | 46.9 (15.9)                 | <0.001   |
| BMI (kg/m <sup>2</sup> )                                               | 28.0 (4.9)                 | 27.4 (4.9)    | 26.8 (4.5)                  | <0.001   |
| Sedentary time (accelerometry data) (Minutes/day)                      | 505.6 (97.7)               | 499.4 (90.7)  | 528.7 (87.2)                | <0.001   |
| TV (Minutes/day)                                                       | 218.6 (117.3)              | 175.8 (97.7)  | 145.0 (74.7)                | <0.001   |
| Non-TV sitting time (Minutes/day)                                      | 128.1 (86.4)               | 121.5 (90.6)  | 133.2 (86.3)                | 0.110    |
| Occupational sitting/standing time (Minutes/day)                       | 151.8 (116.5)              | 173.5 (120.9) | 198.1 (121.9)               | <0.001   |
| MVPA time per day (accelerometry data) (Minutes/day)                   | 24.7 (24.1)                | 29.7 (26.3)   | 32.0 (25.1)                 | <0.001   |

\* Occupational sitting time SEP 1 N=152 SEP 2 N=214; SEP 3 N=549 for SEP 4 & 5

<sup>a</sup> Chi Square was used to test significance of association between categorical variables and social class

<sup>b</sup> Anova was used to test significance of association between continuous variables and social class

### *Composite Socioeconomic position and sedentary time*

Figure 1 presents the GLM estimated marginal means and their 95% CIs describing the associations between composite SEP score and each measure of ST. SEP was positively associated with accelerometry-measured ST and occupational sitting/standing time, and inversely associated with TV time in all models. There were no associations between SEP and non-TV sitting time. Adjustments for potential confounders made no material difference to all above associations. Figure 2 presents associations between SEP score and accelerometry-measured ST, stratified by employment status. SEP score was positively associated with accelerometry-measured ST for those in employment only. SEP was inversely associated with TV time regardless of employment status, while non-TV leisure-time sitting was positively associated with SEP (SEP1 coefficient 134, 95% CI 125 to 145; SEP5 coefficient 177, 155 to 198), but only for those not in employment. However this association was not linear (data not shown).

### *Equivalised Household income and sedentary time*

Figure 3 presents associations between household income and each measure of ST. Household income was positively associated with accelerometer-measured ST and occupational sitting time and these associations persisted following adjustments for MVPA and other confounders. Like with SEP score, household income was inversely associated with TV time, although this association was attenuated to the null following adjustments for potential confounders in models 2 and 3. Household income was not associated with non-TV sitting time.

### *Educational attainment and sedentary time*

1  
2  
3 Figure 4 presents the associations between the highest educational qualification and each  
4 measure of ST. Educational attainment was positively associated with accelerometry-  
5 measured ST and inversely associated with TV time in all models. Occupational  
6 sitting/standing time was inversely associated with education but the association did not  
7 appear to be linear (it was evident across the lowest three educational levels only) and was  
8 attenuated to the null following adjustments for potential confounders. There was a weak  
9 positive association between education and non-TV sitting time, following adjustments for  
10 potential confounders in models 2 and 3.  
11  
12  
13  
14  
15  
16  
17  
18  
19

#### 20 21 *Occupational social class and sedentary time*

22  
23  
24 As shown in Figure 5, occupational social class was positively associated with  
25 accelerometry-measured ST and occupational sitting/standing. The initial inverse association  
26 with TV time (model 1) was attenuated to the null following adjustments for potential  
27 confounders. Similarly to SEP score and income, social class was not associated with non-  
28 TV sitting time.  
29  
30  
31  
32  
33  
34

#### 35 36 *Area deprivation and sedentary time*

37  
38  
39 Area-level deprivation was positively associated with TV time (the lower the deprivation the  
40 lower the TV time) but these associations did not persist in the adjusted models (Figure 6).  
41  
42 Area deprivation was not associated with any other measures of ST (Figure 6).  
43  
44  
45  
46

#### 47 *Differential associations between imputed and non-imputed data*

48  
49  
50 There were no differences between the imputed and non-imputed models describing the  
51 associations between SEP score and ST indicators, although the 95% confidence intervals  
52 were slightly broader in the unimputed models due to the lower sample size (see  
53  
54  
55  
56  
57  
58  
59  
60 supplementary Figure S2).



### *Differential associations in weekday Vs weekend days*

There was no consistent pattern of differences in the associations of SEP and ST by weekend vs weekday (see supplementary Figures S3 and S4), time of the week-specific results showed broadly the same pattern as the whole week. The only notable difference was that a direct association between SEP and non-TV sitting time was observed on weekend days, but not on weekdays.

### **Discussion**

Literature on the socio-economic gradient of sedentary behaviour is very limited and has relied on partial sedentary behaviour indicators, mostly TV viewing. To our knowledge, this study is the only one that considers four indicators of socioeconomic position in relation to four indicators of sedentary behaviour, allowing a much more in-depth examination of the associations of interest than in previous studies. Our study suggests that occupational ST is what drives the positive association between overall SEP and total ST as there was no association among those not in employment (Figure 2). The difference between the lowest and highest SEP groups (Figure 1) is in the region of 60-70 minutes per day for both total accelerometry-measured sedentary time and occupational sitting/standing time and this is comparable with the difference between the extreme SEP group among the economically active part of the sample (~90 minutes/day). As low SEP is more likely to involve fixed length shift-based work one possible explanation is that these occupational ST differences reflect the longer working hours of professionals in higher SEP groups, although we had no information on work times to examine this hypothesis or make statistical adjustments. Our findings agree with an Australian study<sup>19</sup> which found that among women, full-time work, skilled occupations, and university education were all associated with high (self-reported)

1  
2  
3 total sitting time. Our study also found that the inverse association between TV time and SEP  
4  
5 was significant regardless of employment status. In a study of Dutch workers, sitting time at  
6  
7 work varied considerably by type of occupation but not sitting during leisure time<sup>28</sup>.  
8  
9

10 Previous studies of adults in Belgium<sup>13</sup> and Australia<sup>14 15 29</sup> have reported inverse  
11  
12 associations between SEP indicators and TV time. We observed the same TV time pattern  
13  
14 with SEP score and education but not with occupational class, household income or area  
15  
16 deprivation. Although the occupational class and household income data were suggestive of  
17  
18 a weak association with TV time, our current results somehow contradict our study in  
19  
20 Scottish adults,<sup>12</sup> where all SEP indicators (occupational class, household income or area  
21  
22 deprivation) as well as the composite SEP score were associated with recreational screen time  
23  
24 (including TV time). Explanations for this might be that the Scottish study was three times  
25  
26 larger in size (which might have made it easier for data patterns to emerge) and the inclusion  
27  
28 of non-TV screen time as an outcome, although studies from other countries suggest no clear  
29  
30 pattern between non-TV recreational screen time (e.g. computer use) and SEP<sup>30 15</sup>.  
31  
32

33  
34 Nevertheless, both our English and the Scottish studies demonstrate that when education,  
35  
36 occupational social class and income are combined into a single measure (SEP score) they are  
37  
38 a much more powerful predictor of sedentary time than any single indicator, perhaps because  
39  
40 they collectively capture actual socioeconomic position more thoroughly than any single  
41  
42 indicator. Composite SEP score showed a clear and consistent pattern with all ST outcomes,  
43  
44 although each of the individual/household-level SEP indicators seemed to influence each ST  
45  
46 outcome in various ways, suggesting there are complex, interacting, multi-dimensional  
47  
48 influences of SEP on ST. Accelerometry-measured ST was the only sedentary behaviour  
49  
50 variable that showed clear and consistent (positive) associations with all SEP variables  
51  
52 (except from area-level deprivation). Although the cross-sectional design of this study  
53  
54 precludes causal inferences, the pattern of the accelerometry-based associations we observed  
55  
56  
57  
58  
59  
60

1  
2  
3 suggests that it is unlikely that total sedentary behaviour contributes to the well-documented  
4  
5 socioeconomic inequalities in health.<sup>11</sup>  
6  
7  
8  
9

10  
11 Strengths of our study include the availability of both objectively-measured and self-reported  
12 indicators of sedentary behaviour which allowed us to be more thorough and detailed when  
13 examining the associations of interest. Accelerometers can capture total sedentary time more  
14 comprehensively than any partial self-reported indicator and as such are able to better  
15 quantify the socioeconomic gradient of ST as a contributor to health inequalities, however a  
16 limitation is that accelerometers do not distinguish between sitting and standing which have  
17 different health implications, this also applies to occupational sitting/standing time. It has  
18 been argued that standing should not be considered a sedentary behaviour<sup>31</sup>. This limitation  
19 is also pertinent to the self-reported ST assessment as standing time was included in the  
20 occupational ST question. The lack of information on work times did not allow us to  
21 examine the possibility that ST differences between SEP groups are partly due to longer  
22 work hours in higher SEP groups. Taken together, these limitations of the measurements  
23 may, to some extent, have confounded the associations of SEP with total and occupational ST  
24 we reported. Another limitation is that our study was limited to the accelerometry sample of  
25 HSE 2008 and this might have led to our sample being less representative of the target  
26 population. Although those in the subsample offered the accelerometer were older and more  
27 likely to be retired and to be less healthy than the rest of the adult Health Survey for England  
28 sample, those who refused to wear an accelerometer were similar in terms of employment  
29 status and area-level deprivation compared to those who wore the accelerometers for at least  
30 four days a week<sup>32</sup>. Higher SEP is linked to higher commuting by car<sup>33</sup> and this may partly  
31 explain the socioeconomic gradient but our data are limited in that there was no specific  
32 question on commuting-related sitting to examine this explanation.  
33  
34  
35  
36  
37  
38  
39  
40  
41  
42  
43  
44  
45  
46  
47  
48  
49  
50  
51  
52  
53  
54  
55  
56  
57  
58  
59  
60

## Conclusions

Objectively-measured total sedentary time and occupational sedentary time are higher among economically active English adults in higher socioeconomic groups compared to less privileged groups. However, TV viewing is lower in higher socioeconomic groups regardless of economic activity. Combining different socioeconomic indicators appears to have composite power as a predictor of sedentary time.

**Funding:** This work was funded by the National Institute for Health Research through a Career Development Fellowship (ES). NC is also funded by the National Institute for Health Research through the same source. The views expressed in this article are those of the authors and not the English Department of Health or the National Institute for Health Research.

**Data Sharing:** No additional data are available

**Competing interests:** None of the authors have any competing interests to declare

**Authors' Contributions:** All authors have contributed sufficiently, ES conceived the idea, prepared the dataset, drafted most of the manuscript and revised the manuscript several times. NC did the statistical analysis under the supervision of ES and prepared the Tables, Figures and Supplemental Online material. AR processed the accelerometry files. NS, MH and AR redrafted parts of the manuscript and critically evaluated the whole material. All authors approved the final version before submission.

1  
2  
3  
4  
5  
6  
7  
8  
9  
10  
11  
12  
13  
14  
15  
16  
17  
18  
19  
20  
21  
22  
23  
24  
25  
26  
27  
28  
29  
30  
31  
32  
33  
34  
35  
36  
37  
38  
39  
40  
41  
42  
43  
44  
45  
46  
47  
48  
49  
50  
51  
52  
53  
54  
55  
56  
57  
58  
59  
60

For peer review only

## References

1. Pate RR, O'Neill JR, Lobelo F. The evolving definition of "sedentary". *Exercise and Sport Sciences Reviews* 2008;**36**(4):173-78.
2. Katzmarzyk PT, Church TS, Craig CL, et al. Sitting Time and Mortality from All Causes, Cardiovascular Disease, and Cancer. *Med Sci Sports Exerc* 2009;**41**(5):998-1005.
3. Matthews C, George SM, Moore SC, et al. Amount of time spent in sedentary behaviors and cause-specific mortality in US adults. *Am J Clin Nutr* 2012;**95**(2):437-45.
4. Patel AV, Bernstein L, Deka A, et al. Leisure Time Spent Sitting in Relation to Total Mortality in a Prospective Cohort of US Adults. *Am J Epidemiol* 2010;**172**(4):419-29.
5. van der Ploeg HP, Chey T, Korda RJ, et al. Sitting Time and All-Cause Mortality Risk in 222 497 Australian Adults. *Arch Intern Med* 2012;**172**(6):494-500.
6. Grøntved A, Hu FB. Television Viewing and Risk of Type 2 Diabetes, Cardiovascular Disease, and All-Cause Mortality. *JAMA* 2011;**305**(23):2448-55.
7. Joint Health Surveys Unit. The Health Survey for England 2008. Volume 1 Leeds, 2010:21-206.
8. Joint Health Surveys Unit. The Health Survey for England 2008, Volume 2. Leeds: , 2010:11.
9. Marmot MG, Shipley MJ, Hemingway H, et al. Biological and behavioural explanations of social inequalities in coronary heart disease: Whitehall II Study. *Diabetologia* 2008;**51**(11):1980-88.
10. Williams ED, Tapp RJ, Magliano DJ, et al. Health behaviours, socioeconomic status and diabetes incidence: the Australian Diabetes Obesity and Lifestyle Study (AusDiab). *Diabetologia* 2010;**53**:2538-45.
11. Stringhini S, Sabia S, Shipley M, et al. Association of Socioeconomic Position With Health Behaviors and Mortality. *JAMA* 2010;**303**(12):1159-66.
12. Stamatakis E, Hillsdon M, Mishra G, et al. Television viewing and other screen-based entertainment in relation to multiple socioeconomic status indicators and area deprivation: the Scottish Health Survey 2003. *Journal of epidemiology and community health* 2009;**63**(9):734-40.
13. Van Dyck D, Cardon G, Deforche B, et al. Socio-demographic, psychosocial and home-environmental attributes associated with adults' domestic screen time. *BMC Public Health* 2011;**11**:668.
14. Teychenne M, Ball K, Salmon J. Correlates of socio-economic inequalities in women's television viewing: a study of intrapersonal, social and environmental mediators. *Int J Behav Nutr Phy Act* 2012;**9**:3.
15. Burton NW, Haynes M, van Uffelen JGZ, et al. Mid-Aged Adults' Sitting Time in Three Contexts. *Am J Prev Med* 2012;**42**(4):363-73.
16. Bowman SA. Television-viewing characteristics of adults: correlations to eating practices and overweight and health status. *Preventing Chronic Disease* 2006;**3**(2).
17. Stamatakis E, Hamer M, Tilling K, et al. Sedentary time in relation to cardio-metabolic risk factors: differential associations for self-report vs accelerometry in working age adults. *Int J Epidemiol* 2012;**41**:1328-37.
18. Clark BK, Healy GN, Winkler EAH, et al. Relationship of Television Time with Accelerometer-Derived Sedentary Time: NHANES *Med Sci Sports Exerc* 2011;**43**(5):822-28.
19. van Uffelen JGZ, Heesch KC, Brown W. Correlates of Sitting Time in Working Age Australian Women: Who Should Be Targeted With Interventions to Decrease Sitting Time? *J Phys Act Health* 2012;**9**(2):270-87.
20. Santos R, Soares-Miranda L, Vale S, et al. Sitting time and body mass index, in a portuguese sample of men: Results from the azorean physical activity and health study (APAHS). *Int J Environ Res Publ Health* 2010;**7**(4):1500-07.
21. Duncan MJ, HBadland HM, Mummery WK. Physical Activity Levels by Occupational Category in Non-Metropolitan Australian Adults. *J Phys Act Health* 2010;**7**(6):718-23.

- 1  
2  
3 22. Matthews CE, Chen KY, Freedson PS, et al. Amount of time spent in sedentary behaviors in the  
4 united states, 2003-2004. *Am J Epidemiol* 2008;**167**(7):875-81.
- 5 23. Stamatakis E, Ekelund U, Wareham N. Temporal trends in physical activity in England. The Health  
6 Survey for England 1991 to 2004. . *Prev Med* 2007;**45**:416-23.
- 7 24. Stamatakis E, Chaudhury M. Temporal trends in adults' sports participation patterns in England  
8 between 1997 and 2006: the Health Survey Br *J Sports Med* 2008;**42**:601-08.
- 9 25. Scholes S, Coombs N, Pedisic Z, et al. Age- and sex-specific criterion validity of the health survey  
10 for England physical activity and sedentary behavior assessment questionnaire as compared  
11 with accelerometry. *Am J Epidemiol* 2014;**179**(12):1493-502.
- 12 26. Troiano RP, Berrigan D, Dodd KW, et al. Physical activity in the United States measured by  
13 accelerometer. *Med Sci Sports Exerc* 2008;**40**(1):181-8.
- 14 27. Gallo V, Egger M, McCormack V, et al. STrengthening the Reporting of OBservational studies in  
15 Epidemiology--Molecular Epidemiology (STROBE-ME): an extension of the STROBE  
16 Statement. *PLoS medicine* 2011;**8**(10):e1001117.
- 17 28. Jans M, Proper K, Hildebrandt V. Sedentary Behavior in Dutch Workers: Differences between  
18 Occupations and Business Sectors. *Am J Prev Med* 2007;**33**:450-54.
- 19 29. Stamatakis E, Grunseit AC, Coombs N, et al. Associations between socio-economic position and  
20 sedentary behaviour in a large population sample of Australian middle and older-aged  
21 adults: The Social, Economic, and Environmental Factor (SEEF) Study. *Prev Med* 2014;**63c**:72-  
22 80.
- 23 30. Rhodes RE, Mark RS, Temmel CP. Adult Sedentary Behavior A Systematic Review. *Am J Prev Med*  
24 2012;**42**(3):E3-E28.
- 25 31. Yates T, Wilmot EG, Khunti K, et al. Stand up for your health: Is it time to rethink the physical  
26 activity paradigm? *Diabetes Research and Clinical Practice* 2011;**93**(2):292-94.
- 27 32. Roth M, Mindell J. Who provides accelerometry data? Correlates of adherence to wearing an  
28 accelerometry motion sensor: the 2008 health survey for England. *J Phys Act Health*  
29 2013;**10**(1):70-78.
- 30 33. Goodman A, Guell C, Panter J, et al. Healthy travel and the socio-economic structure of car  
31 commuting in Cambridge, UK: A mixed-methods analysis. *Social Science & Medicine*  
32 2012;**74**(12):1929-38.
- 33  
34  
35  
36  
37  
38  
39  
40  
41  
42  
43  
44  
45  
46  
47  
48  
49  
50  
51  
52  
53  
54  
55  
56  
57  
58  
59  
60

## Figure Legends and footnotes

### Figure 1: Multivariate-adjusted average daily sedentary time by SEP score

Model 1: adjusted for age and sex; model 2: further adjustments for area deprivation, BM, limiting long standing illness, difficulty with usual activities, car ownership, drinking frequency, and smoking status; model 3: further adjustments for self-reported time spent in MVPA, accelerometry-measured MVPA time, and average accelerometer wear time on valid days. Models with accelerometer sedentary time as the outcome were also adjusted for average accelerometer wear time on valid days.

a Coefficients represent estimated marginal means from generalised linear models, with 95% confidence intervals. Linear trend p values were obtained from linear regression.

b SEP1 indicates most deprived, SEP 5 indicates least deprived

c Any paid work in the last four weeks.

### Figure 2: Multivariate-adjusted accelerometer-measured sedentary time by SEP Score for individuals stratified by employment status.

Model 1: adjusted for age and sex; model 2: further adjustments for area deprivation, BM, limiting long standing illness, difficulty with usual activities, car ownership, drinking frequency, and smoking status; model 3: further adjustments for self-reported time spent in MVPA, accelerometry-measured MVPA time, and average accelerometer wear time on valid days. Models with accelerometer sedentary time as the outcome were also adjusted for average accelerometer wear time on valid days.

a Coefficients represent estimated marginal means from generalised linear models, with 95% confidence intervals. Linear trend p values were obtained from linear regression.

b SEP1 indicates most deprived, SEP 5 indicates least deprived

c Any paid work in the last four weeks.

### Figure 3: Multivariate-adjusted average daily sedentary time by household income quartile

Model 1: adjusted for age and sex; model 2: further adjustments for area deprivation, BM, limiting long standing illness, difficulty with usual activities, car ownership, drinking frequency, and smoking status; model 3: further adjustments for self-reported time spent in MVPA, accelerometry-measured MVPA time, and average accelerometer wear time on valid days. Models with accelerometer sedentary time as the outcome were also adjusted for average accelerometer wear time on valid days.

a Coefficients represent estimated marginal means from generalised linear models, with 95% confidence intervals. Linear trend p values were obtained from linear regression.

b Q1 indicates lowest income quartile ( $\leq$ £13876), Q4 indicates the highest income quartile ( $\geq$ £39001).

### Figure 4: Multivariate-adjusted difference average daily sedentary time by highest qualification

Model 1: adjusted for age and sex; model 2: further adjustments for area deprivation, BM, limiting long standing illness, difficulty with usual activities, car ownership, drinking frequency, and smoking status; model 3: further adjustments for self-reported time spent in MVPA, accelerometry-measured MVPA time, and average



1  
2  
3 accelerometer wear time on valid days. Models with accelerometer sedentary time as the outcome were also  
4 adjusted for average accelerometer wear time on valid days.

5 a Coefficients represent estimated marginal means from generalised linear models, with 95% confidence  
6 intervals. Linear trend p values were obtained from linear regression.

7 b Education Level 1 represents NVQ1/CSE and NVQ2 GCE O Level equivalent; Level 2 represents

8 NVQ3/GCE A Level equivalent; Level 3 represents higher education below Degree and NVQ4/NVQ5/Degree

9  
10 or higher.

11  
12  
13 **Figure 5:** Multivariate-adjusted average daily sedentary time<sup>a</sup> by occupational social class.

14  
15  
16 Model 1: adjusted for age and sex; model 2: further adjustments for area deprivation, BM, limiting long  
17 standing illness, difficulty with usual activities, car ownership, drinking frequency, and smoking status; model  
18 3: further adjustments for self-reported time spent in MVPA, accelerometry-measured MVPA time, and average  
19 accelerometer wear time on valid days. Models with accelerometer sedentary time as the outcome were also  
20 adjusted for average accelerometer wear time on valid days.

21 a Coefficients represent estimated marginal means from generalised linear models, with 95% confidence  
22 intervals. Linear trend p values were obtained from linear regression.

23  
24  
25 **Figure 6:** Multivariate-adjusted sedentary time by area deprivation quintile.

26  
27  
28 Model 1: adjusted for age and sex; model 2: further adjustments for area deprivation, BM, limiting long  
29 standing illness, difficulty with usual activities, car ownership, drinking frequency, and smoking status; model  
30 3: further adjustments for self-reported time spent in MVPA, accelerometry-measured MVPA time, and average  
31 accelerometer wear time on valid days. Models with accelerometer sedentary time as the outcome were also  
32 adjusted for average accelerometer wear time on valid days.

33 a Coefficients represent estimated marginal means from generalised linear models, with 95% confidence  
34 intervals. Linear trend p values were obtained from linear regression.

35 b Q1 indicates most deprived, Q5 indicates least deprived  
36  
37  
38  
39  
40  
41  
42  
43  
44  
45  
46  
47  
48  
49  
50  
51  
52  
53  
54  
55  
56  
57  
58  
59  
60

1  
2  
3  
4  
5  
6  
7  
8  
9  
10  
11  
12  
13  
14  
15  
16  
17  
18  
19  
20  
21  
22  
23  
24  
25  
26  
27  
28  
29  
30  
31  
32  
33  
34  
35  
36  
37  
38  
39  
40  
41  
42  
43  
44  
45  
46  
47  
48  
49  
50  
51  
52  
53  
54  
55  
56  
57  
58  
59  
60

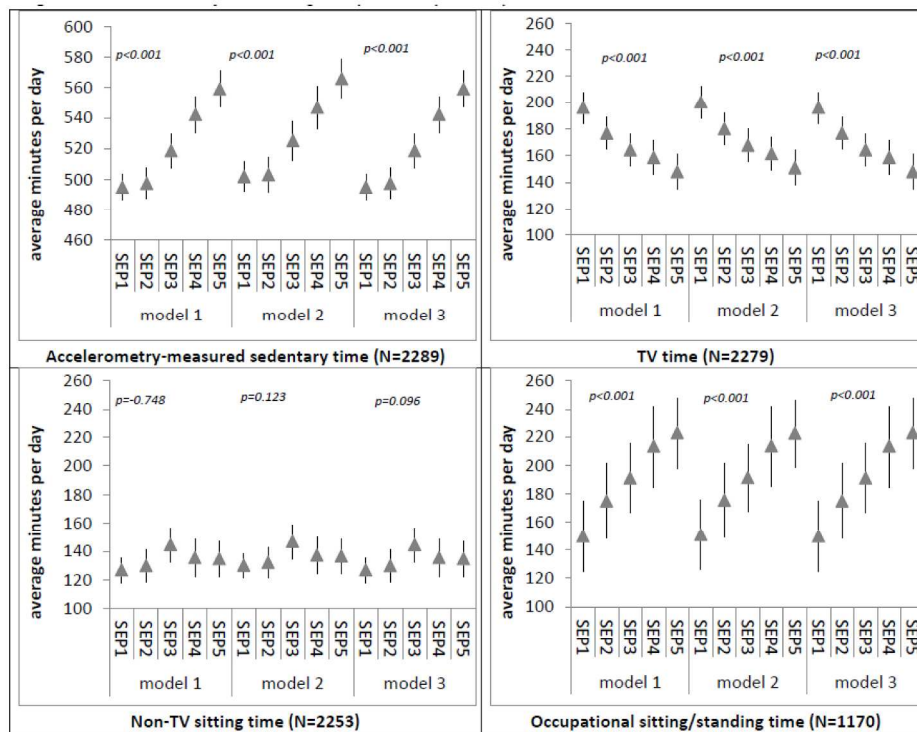

Figure 1: Multivariate-adjusted average daily sedentary time by SEP score  
254x190mm (300 x 300 DPI)

Review only

## Supplemental Digital Content 1

### Unabridged Methods

#### *Study Sample*

The Health Survey for England (HSE) is a repeated nationally representative study of individuals living in private households in England. We drew our sample from the 2008 HSE which had a special focus on physical activity and sedentary behaviour. The sample is drawn using multi-stage stratified probability sampling with postcode sectors as the primary sampling unit. More details of the sample design are available elsewhere (2). The household response rate was 64% for the main sample, and 73% for the accelerometer sub-sample (3). Ethical approval for the 2008 HSE was obtained from the Oxford A Research Ethics Committee (reference number 07/H0604/102). We included adults aged 16 and over who had both valid accelerometry and self-reported SB data. Participants provided written informed consent. In total, 2289 adults (1030 males) provided valid accelerometry data, with 2279 (1020 males) and 2253 (1014) males) also providing self-reported TV and non-TV time respectively. 1170 (576 males) provided occupational sitting/standing time

#### *Demographics and contextual variables*

Trained fieldworkers assessed participants' demographics, self-rated health, long standing illness, alcohol consumption and smoking using Computer Assisted Personal Interviewing. Height and weight were measured by the same fieldworkers using standard protocols that have been described in detail elsewhere (5). Body mass index (BMI) was computed as weight (kilograms) divided by squared height (metres).

#### *Socioeconomic position measures*

Social class was determined using the Registrar General's classification and was grouped as I&II (professional and managerial/technical), III Non-manual, III manual, IV&V (semi-skilled manual and

1  
2  
3 unskilled manual). Household income was converted to equivalised annual household income that is  
4  
5 adjusted for the number of persons in the household using the McClements scoring system (15). The  
6  
7 income data presented here are based on quartiles. Highest education qualification was coded as no  
8  
9 qualification and three levels: Level 1 represents secondary school or below (NVQ1/CSE and  
10  
11 NVQ2/GCE O Level equivalent); Level 2 represents post-compulsory secondary school (NVQ3/GCE  
12  
13 A Level equivalent) and Level 3 represents higher education (higher education below Degree and  
14  
15 NVQ4/NVQ5/Degree or higher). Area deprivation was assessed using the 2004 Index of Multiple  
16  
17 Deprivation (IMD) which provides a measure of area deprivation with deprivation based on measures  
18  
19 in seven domains: income, employment, health deprivation and disability, education, skills and  
20  
21 training, barriers to housing and services, crime and living environment. IMD was initially a  
22  
23 continuous score that we grouped into quintiles (1 representing the most deprived quintile, and 5  
24  
25 representing the least deprived).  
26  
27  
28  
29

### 30 *Sedentary time and physical activity measures*

#### 31 *Objective measures*

32  
33  
34  
35  
36 A random sub-sample of HSE 2008 participants were selected to wear a uniaxial accelerometer  
37  
38 (Actigraph model GT1M, Pensacola, Florida) during waking hours for seven consecutive days. At the  
39  
40 core addresses that were eligible for accelerometry, up to two adults in total were selected to wear the  
41  
42 accelerometer (up to one adult in those households with eligible children). Full details of the  
43  
44 accelerometry sample selection procedure can be found elsewhere (6). At the end of the initial HSE  
45  
46 2008 interview, interviewers obtained agreement for participation in the accelerometry study,  
47  
48 provided the accelerometers and explained procedures. The accelerometry data were processed using  
49  
50 specialist software (KineSoft, New Brunswick). In consistency with previous epidemiological SB  
51  
52 studies (8), the sampling epoch was one minute and non-wear time was defined as periods of at least  
53  
54 60 consecutive minutes of zero counts, with allowance for up to 2 consecutive minutes of 1–99  
55  
56 counts/minute. For a day to be ‘valid’ for inclusion in the analyses, participants had to have worn the  
57  
58 accelerometer for a minimum of 600 minutes. Like previously (7), participants with at least one day  
59  
60

1  
2  
3 of valid wear were included in these analyses, although the majority (76%, N=1742) had between six  
4 and seven days and 95% (N=2165) had at least three valid days. All physical activity and sedentary  
5 time variables were converted to time (in minutes) per valid day.  
6  
7  
8  
9

### 10 11 12 13 *Self-reported measures* 14

15  
16 Sedentary time was assessed using a set of questions on the usual weekday time spent on: a) TV  
17 (including DVDs and videos) viewing (“In the last four weeks, how much time did you spend  
18 watching TV/videos) on an average week day?”); and b) any other sitting during non-work times,  
19 including reading and computer use (“In the last 4 weeks, how much time did you spend sitting down  
20 doing any other activity on an average weekday? Please do not include time spent doing these  
21 activities while at work”). An equivalent set of questions assessed TV and non-TV sedentary time in  
22 the weekend days. For those participants who were economically active (i.e. those who answered  
23 “yes” to the question “In the last 4 weeks, did you do any paid or unpaid work either as an employee  
24 or as self-employed (including voluntary or part time work)?”) another set of questions assessed the  
25 average daily times spent sitting/standing while at work (“On an average work day in the last four  
26 weeks, how much time did you usually spend sitting down or standing up?”). (14) While it is not  
27 ideal to include standing as a measure of sedentary time, it is often necessitated by the unavailability  
28 of sitting-specific data, and standing is routinely included in objectively measured sedentary data as  
29 most accelerometers are unable to differentiate between time spent sitting or standing. For the  
30 purposes of this study, standing will be considered a measure of sedentary behaviour.  
31  
32  
33  
34  
35  
36  
37  
38  
39  
40  
41  
42  
43  
44  
45  
46  
47  
48  
49

50 Physical activity was assessed using the long version of the Health Survey for England questionnaire  
51 that was used in the 1997 Survey for the first time and was repeated in the 1998, 2006, and 2008  
52 Surveys. Questions included frequency (number of days in the last 4 weeks) and duration (minutes  
53 per day) of participation in walking for any purpose, domestic physical activity (12) (11) and any  
54 recreational exercise, (e.g. cycling, swimming, aerobics, gym exercises, dancing, team sports, racket  
55 sports) (9). Occupational activity was measured as average daily (per day at work) times spent on  
56  
57  
58  
59  
60

1  
2  
3 walking, climbing stairs or ladders, and lifting, carrying or moving loads (5). We calculated MVPA  
4  
5 using established metabolic equivalent tables (1). The criterion validity of the physical activity  
6  
7 questionnaire has been demonstrated in a study of 106 English adults from the general population (45  
8  
9 men) where the output of accelerometers (worn for two non-consecutive weeks over a month period)  
10  
11 was compared against the above questions (4, 13).  
12  
13  
14  
15  
16  
17

### 18 *Data handling/Statistical analysis*

#### 19 *Regrouping the Socioeconomic position variables*

20  
21 Due to small numbers of observations, the top and bottom two categories of social class were  
22  
23 collapsed, resulting in four categories: unskilled /semi-skilled manual; skilled manual; skilled non-  
24  
25 manual; and managerial/technical/ professional. Using existing methods (10), we derived a composite  
26  
27 Socioeconomic Position (SEP) score using household income, individual education, and occupational  
28  
29 social class of the head of household. The lowest category of each component variable was assigned a  
30  
31 SEP score of 0, the second lowest category was given a SEP score of 1, and so on, with the highest  
32  
33 category given a SEP score of 4. The scores for each individual SEP indicator were then aggregated,  
34  
35 resulting in a SEP score ranging from 0 to 12. Due to small numbers of observations in the high and  
36  
37 low end of the score, the SEP score was collapsed into five categories of comparable size (0-3=SEP1;  
38  
39 4-5=SEP2; 6-7=SEP3; 8=SEP4; 9-12=SEP5), with 1 representing the lowest SEP, and 5 the highest.  
40  
41  
42  
43  
44  
45  
46  
47  
48

#### 49 *Deriving sedentary time and physical activity variables*

50  
51 Week- and weekend day-specific TV and non-TV leisure time sitting were converted to all-week time  
52  
53 (minutes) using the following formula:  $(\text{weekday time} \times 5) + (\text{weekend day time} \times 2) / 7$ .  
54  
55 Occupational sitting/standing time (minutes) per day was calculated by multiplying the number of  
56  
57 days worked per week by the average time spent sitting/standing at work on a work day, and dividing  
58  
59 by 7.  
60

1  
2  
3 Weekly self-reported MVPA hours/week were calculated as number of days of participation  
4 multiplied by time per day in each activity type (walking, cycling, and each other sport and exercise  
5 the questionnaire enquired about) (5, 6) Due to the large number of participants and the very skewed  
6 distribution, self-reported MVPA was categorised in to none, less than 30 minutes, 30 minutes to 1  
7 hour, 1 to 2 hours, and more than 2 hours of MVPA per day.  
8  
9  
10  
11  
12  
13  
14  
15  
16  
17

18 For the accelerometry data we used 0-99 counts/minute to denote sedentary (<1.5 MET) (7); 200-  
19 2,019 counts/minute to denote light physical activity; and  $\geq 2,020$  counts/minute to denote MVPA (>3  
20 MET) (16). Accelerometer-measured sedentary time and physical activity variables were converted to  
21 time (in minutes) per valid day.  
22  
23  
24  
25  
26  
27  
28  
29

### 30 *Missing data and multiple imputation*

31 To improve the normality of the residuals that are required for linear regression, outliers outside 3  
32 standard deviations of the mean for all continuous variables apart from age were removed from the  
33 analyses. This excluded 1.3% to 2.2% of cases from each continuous variable. Due to a substantial  
34 proportion of cases with at least one missing value in at least one covariable or exposure variable  
35 (22% to 28% depending on the exposure variable) we performed multiple imputation. IBM SPSS v20  
36 was used to conduct the multiple imputation, missing values were imputed for all covariables and  
37 exposures, with observed maximum and minimum values used as constraints. Outcome variables did  
38 not have missing values imputed, but were included in the imputation models to predict missing  
39 values in other variables. Linear regression was used as the type of imputation, and 5 cycles of  
40 imputation were conducted resulting in 5 imputed datasets. Results from these 5 datasets were  
41 combined using the multiple imputation module in SPSS to provide pooled results. The imputed  
42 sample size is limited to the number of valid observations for each outcome variable (2279 for  
43 accelerometry-measured ST, 2269 for TV time, 2253 for non-TV sitting time, and 1170 for  
44 occupational sitting time). Non-imputed results are presented in the appendix.  
45  
46  
47  
48  
49  
50  
51  
52  
53  
54  
55  
56  
57  
58  
59  
60

### *Dealing with non-response*

Analyses were weighted for non-response (5) to give a sample that was representative of adults living in England. In brief, the non-response weights were calculated by fitting a logistic regression model (weighted by a previously developed weighting factor)(5) for all adults with interview completion as the outcome and age group by sex, household type, geographical area, and household social class as covariates. The non-response weights, which were trimmed at the 1% tails to remove extreme values, were calculated as the inverse of the predicted probabilities of response.(5) The complex samples module in SPSS was used to account for clusters in the survey design.

### *Statistical analysis*

The associations between each of the socioeconomic indicators (household income, social class, education, SEP score, and area deprivation,) and each individual ST indicator (TV time, non-TV sitting time, occupational sitting/standing, and accelerometer-measured ST) was examined using generalised linear models, and by multiple linear regression to determine linear trend p values. Results are presented for the whole week, the weekday/weekend day-specific results can be found in the online appendix. SPSS version 21 was used for all analyses. For all multivariate analyses we used the complex samples generalised linear models (GLM) procedure to take into account the complex survey design.

All statistical models were run for each combination of dependent variable and main exposure.

Different models were adjusted for: 1) age and sex; 2) additionally for BMI, limiting long standing illness, difficulty with usual activities, car ownership, drinking frequency, smoking status, and other socioeconomic indicators (household income, social class, area deprivation); 3) additionally for time spent in self-reported MVPA and accelerometer-measured MVPA, and average accelerometer wear



1  
2  
3 time on valid days Models with accelerometer-measured ST as the outcome were also adjusted for  
4  
5 average accelerometer wear time on each valid day. There was no evidence of colinearity in the  
6  
7 multivariate model as no variance inflation factor value was higher than approximately 1.5, with most  
8  
9 values just over 1. Residual statistics and plots for each model were checked for normality,  
10  
11 independence of observations, homoscedasticity, and influential outliers.  
12  
13

14  
15  
16 GLM coefficients indicate mean differences in sedentary time (in minutes) between the reference  
17  
18 category and each of the other SEP categories. The lowest SEP category (<£10671 for household  
19  
20 income, unskilled/ semi-skilled manual for social class, most deprived quintile for area deprivation,  
21  
22 SEP1 (lowest socioeconomic position) for SEP score) is the reference category for the mean  
23  
24 difference in the outcome (and associated confidence interval for the difference) in all CSGLMs.  
25  
26  
27  
28

## 29 30 31 32 33 34 35 36 37 38 39 40 41 42 43 44 45 46 47 48 49 50 51 52 53 54 55 56 57 58 59 60

### References

1. Ainsworth BE, Haskell WL, Whitt MC et al. Compendium of physical activities: an update of activity codes and MET intensities. *Med Sci Sports Exerc.* 2000;32(9 Suppl):S498-504.
2. Joint Health Surveys Unit. *The Health Survey for England 2008. Volume 1* Leeds2010.
3. Joint Health Surveys Unit. *The Health Survey for England 2008. Volume 2* Leeds2010.
4. Joint Health Surveys Unit. *The Health Survey for England Physical Activity Validation Study: substantive report.* Leeds: Health and Social Care Information Centre; 2007.
5. Joint Health Surveys Unit. *The Health Survey for England 2008.* Leeds: The Information Centre for Health and Social Care; 2009.
6. Joint Health Surveys Unit. *The Health Survey for England 2008, Volume 2: Methods and Documentation.* Leeds: The Information Centre for Health and Social Care; 2009.
7. Matthews C, George SM, Moore SC et al. Amount of time spent in sedentary behaviors and cause-specific mortality in US adults. *The American Journal of Clinical Nutrition.* 2012;95(2):437-45.
8. Matthews CE, Chen KY, Freedson PS et al. Amount of time spent in sedentary behaviors in the united states, 2003-2004. *Am J Epidemiol.* 2008;167(7):875-81.
9. Stamatakis E, Chaudhury M. Temporal trends in adults' sports participation patterns in England between 1997 and 2006: the Health Survey *Br J Sports Med.* 2008;42:601-8.
10. Stamatakis E, Hillsdon M, Mishra G, Hamer M, Marmot M. Television viewing and other screen-based entertainment in relation to multiple socioeconomic status indicators and area deprivation: the Scottish Health Survey 2003. *J Epidemiol Commun Health.* 2009;63:734-40.
11. Stamatakis E, Ekelund U, Wareham N. Temporal trends in physical activity in England. The Health Survey for England 1991 to 2004. . *Prev Med.* 2007;45:416-23.
12. Stamatakis E, Hamer M, Lawlor DA. Physical activity, mortality and cardiovascular disease: Is domestic physical activity beneficial? The Scottish Health Survey 1995, 1998 and 2003. . *Am J Epidemiol.* 2009;169:1191-200.

- 1
  - 2
  - 3
  - 4
  - 5
  - 6
  - 7
  - 8
  - 9
  - 10
  - 11
  - 12
  - 13
  - 14
  - 15
  - 16
  - 17
  - 18
  - 19
  - 20
  - 21
  - 22
  - 23
  - 24
  - 25
  - 26
  - 27
  - 28
  - 29
  - 30
  - 31
  - 32
  - 33
  - 34
  - 35
  - 36
  - 37
  - 38
  - 39
  - 40
  - 41
  - 42
  - 43
  - 44
  - 45
  - 46
  - 47
  - 48
  - 49
  - 50
  - 51
  - 52
  - 53
  - 54
  - 55
  - 56
  - 57
  - 58
  - 59
  - 60
13. Stamatakis E, Hamer M, Primatesta P. Cardiovascular medication, physical activity and mortality: cross-sectional population study with ongoing mortality follow-up. *Heart*. 2009;95(6):448-53.
14. Stamatakis E, Hamer M, Tilling K, Lawlor DA. Sedentary time in relation to cardio-metabolic risk factors: differential associations for self-report vs accelerometry in working age adults. *Int J Epidemiol*. 2012.
15. Stamatakis E, Hillsdon M, Mishra G, Hamer M, Marmot M. Television viewing and other screen-based entertainment in relation to multiple socioeconomic status indicators and area deprivation: the Scottish Health Survey 2003. *Journal of Epidemiology and Community Health*. 2009;63(9):734-40.
16. Troiano RP, Berrigan D, Dodd KW, Masse LC, Tilert T, McDowell M. Physical activity in the United States measured by accelerometer. *Med Sci Sports Exerc*. 2008;40(1):181-8.

1  
2  
3  
4  
5  
6  
7  
8  
9  
10  
11  
12  
13  
14  
15  
16  
17  
18  
19  
20  
21  
22  
23  
24  
25  
26  
27  
28  
29  
30  
31  
32  
33  
34  
35  
36  
37  
38  
39  
40  
41  
42  
43  
44  
45  
46  
47  
48  
49  
50  
51  
52  
53  
54  
55  
56  
57  
58  
59  
60

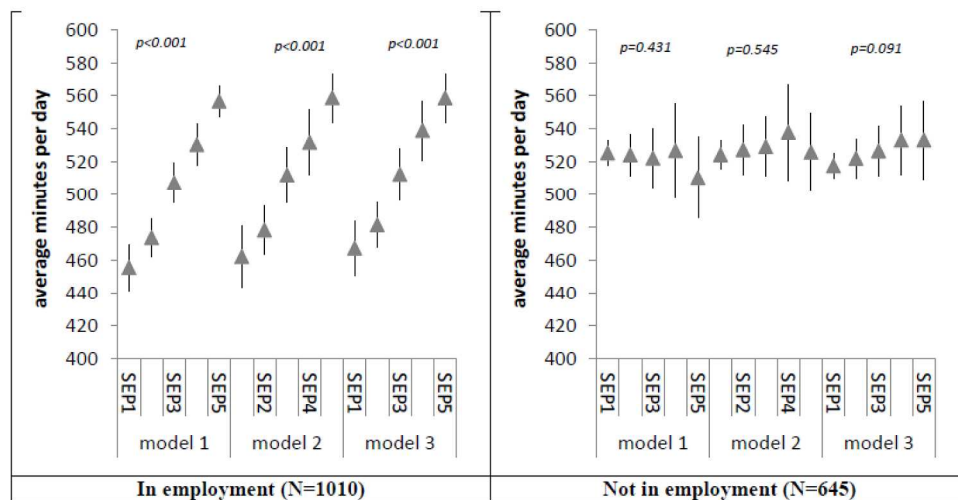

Figure 2: Multivariate-adjusted accelerometer-measured sedentary time by SEP Score for individuals stratified by employment status  
254x190mm (300 x 300 DPI)

ew only

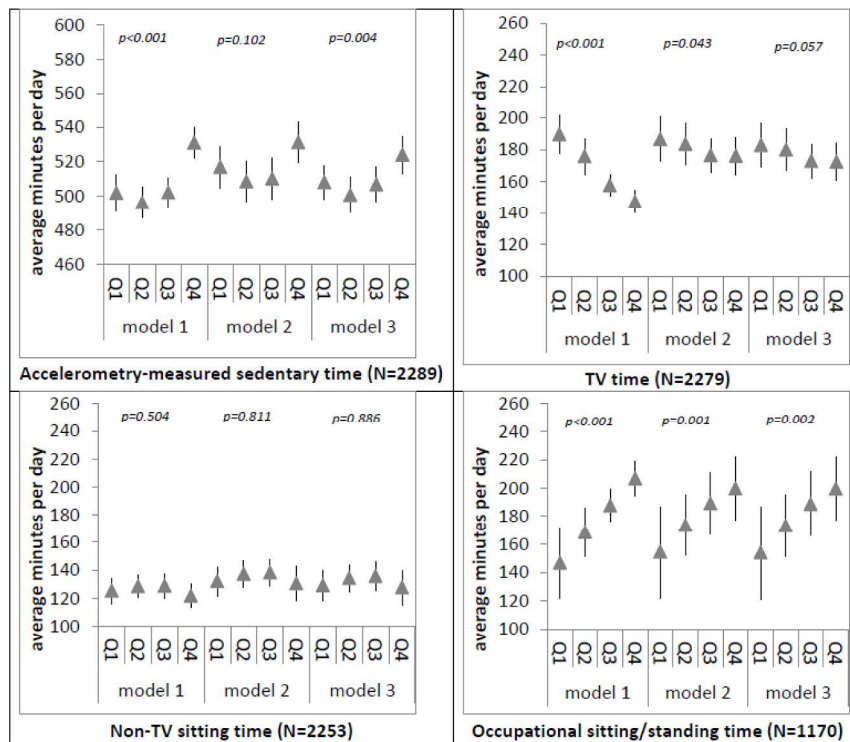

Figure 3: Multivariate-adjusted average daily sedentary time by household income quartile  
254x190mm (300 x 300 DPI)

Review only

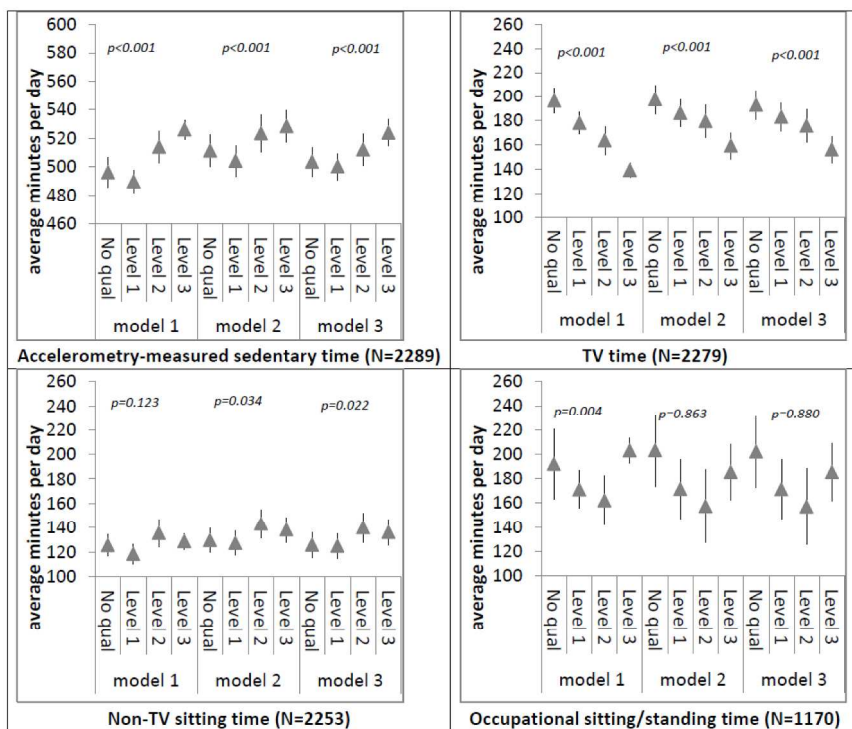

Figure 4: Multivariate-adjusted difference average daily sedentary time by highest qualification  
254x190mm (300 x 300 DPI)

View only

1  
2  
3  
4  
5  
6  
7  
8  
9  
10  
11  
12  
13  
14  
15  
16  
17  
18  
19  
20  
21  
22  
23  
24  
25  
26  
27  
28  
29  
30  
31  
32  
33  
34  
35  
36  
37  
38  
39  
40  
41  
42  
43  
44  
45  
46  
47  
48  
49  
50  
51  
52  
53  
54  
55  
56  
57  
58  
59  
60

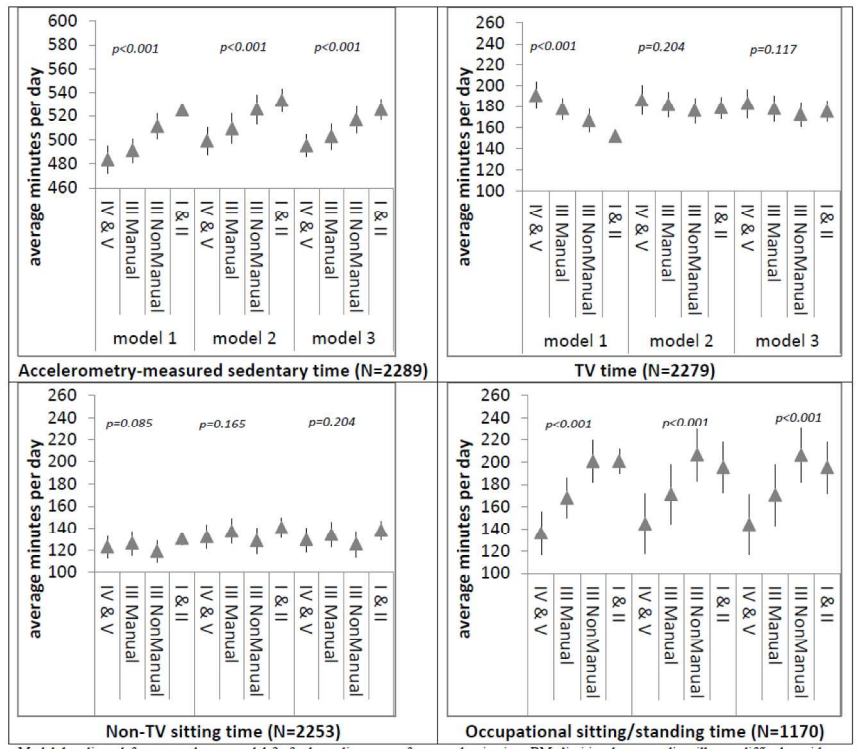

Figure 5: Multivariate-adjusted average daily sedentary timea by occupational social class  
254x190mm (300 x 300 DPI)

Review only



Figure 6: Multivariate-adjusted sedentary time by area deprivation quintiles  
254x190mm (300 x 300 DPI)

Review only

Supplementary Figure S2: Multivariate-adjusted average daily sedentary time<sup>a</sup> by SEP score<sup>b</sup>. Unimputed, casewise-deleted data.



Model 1: adjusted for age and sex; model 2: further adjustments for area deprivation, BM, limiting long standing illness, difficulty with usual activities, car ownership, drinking frequency, and smoking status; model 3: further adjustments for self-reported time spent in MVPA, accelerometer-measured MVPA time, and average accelerometer wear time on valid days. Models with accelerometer sedentary time as the outcome were also adjusted for average accelerometer wear time on valid days.

<sup>a</sup> Coefficients represent estimated marginal means from generalised linear models, with 95% confidence intervals. Linear trend p values were obtained from linear regression.

<sup>b</sup> SEP1 indicates most deprived, SEP 5 indicates least deprived



Supplementary Figure S3: Multivariate-adjusted average daily sedentary time<sup>a</sup> by SEP score<sup>b</sup>. Weekdays.



Model 1: adjusted for age and sex; model 2: further adjustments for area deprivation, BM, limiting long standing illness, difficulty with usual activities, car ownership, drinking frequency, and smoking status; model 3: further adjustments for self-reported time spent in MVPA, accelerometer-measured MVPA time, and average accelerometer wear time on valid days. Models with accelerometer sedentary time as the outcome were also adjusted for average accelerometer wear time on valid days.

<sup>a</sup> Coefficients represent estimated marginal means from generalised linear models, with 95% confidence intervals. Linear trend p values were obtained from linear regression.

<sup>b</sup> SEP1 indicates most deprived, SEP 5 indicates least deprived

Supplementary Figure S4: Multivariate-adjusted average daily sedentary time<sup>a</sup> by SEP score<sup>b</sup>. Weekend days.



Model 1: adjusted for age and sex; model 2: further adjustments for area deprivation, BM, limiting long standing illness, difficulty with usual activities, car ownership, drinking frequency, and smoking status; model 3: further adjustments for self-reported time spent in MVPA, accelerometer-measured MVPA time, and average accelerometer wear time on valid days. Models with accelerometer sedentary time as the outcome were also adjusted for average accelerometer wear time on valid days.

<sup>a</sup> Coefficients represent estimated marginal means from generalised linear models, with 95% confidence intervals. Linear trend p values were obtained from linear regression.

<sup>b</sup> SEP1 indicates most deprived, SEP 5 indicates least deprived

STROBE 2007 (v4) Statement—Checklist of items that should be included in reports of *cross-sectional studies*

| Section/Topic                | Item # | Recommendation                                                                                                                                                                       | Reported on page # |
|------------------------------|--------|--------------------------------------------------------------------------------------------------------------------------------------------------------------------------------------|--------------------|
| Title and abstract           | 1      | (a) Indicate the study's design with a commonly used term in the title or the abstract                                                                                               | 2                  |
|                              |        | (b) Provide in the abstract an informative and balanced summary of what was done and what was found                                                                                  | 2                  |
| <b>Introduction</b>          |        |                                                                                                                                                                                      |                    |
| Background/rationale         | 2      | Explain the scientific background and rationale for the investigation being reported                                                                                                 | 3-4                |
| Objectives                   | 3      | State specific objectives, including any prespecified hypotheses                                                                                                                     | 4                  |
| <b>Methods</b>               |        |                                                                                                                                                                                      |                    |
| Study design                 | 4      | Present key elements of study design early in the paper                                                                                                                              | 6                  |
| Setting                      | 5      | Describe the setting, locations, and relevant dates, including periods of recruitment, exposure, follow-up, and data collection                                                      | 6-7                |
| Participants                 | 6      | (a) Give the eligibility criteria, and the sources and methods of selection of participants                                                                                          | 6                  |
| Variables                    | 7      | Clearly define all outcomes, exposures, predictors, potential confounders, and effect modifiers. Give diagnostic criteria, if applicable                                             | 7-8                |
| Data sources/<br>measurement | 8*     | For each variable of interest, give sources of data and details of methods of assessment (measurement). Describe comparability of assessment methods if there is more than one group | 6-8                |
| Bias                         | 9      | Describe any efforts to address potential sources of bias                                                                                                                            | 8                  |
| Study size                   | 10     | Explain how the study size was arrived at                                                                                                                                            | 10                 |
| Quantitative variables       | 11     | Explain how quantitative variables were handled in the analyses. If applicable, describe which groupings were chosen and why                                                         | 9-10               |
| Statistical methods          | 12     | (a) Describe all statistical methods, including those used to control for confounding                                                                                                | 9-10               |
|                              |        | (b) Describe any methods used to examine subgroups and interactions                                                                                                                  | 9-10               |
|                              |        | (c) Explain how missing data were addressed                                                                                                                                          | 9                  |
|                              |        | (d) If applicable, describe analytical methods taking account of sampling strategy                                                                                                   | 10                 |
|                              |        | (e) Describe any sensitivity analyses                                                                                                                                                | 9-10               |
| <b>Results</b>               |        |                                                                                                                                                                                      |                    |

|                          |     |                                                                                                                                                                                                              |       |
|--------------------------|-----|--------------------------------------------------------------------------------------------------------------------------------------------------------------------------------------------------------------|-------|
| Participants             | 13* | (a) Report numbers of individuals at each stage of study—eg numbers potentially eligible, examined for eligibility, confirmed eligible, included in the study, completing follow-up, and analysed            | 10-11 |
|                          |     | (b) Give reasons for non-participation at each stage                                                                                                                                                         | 10-11 |
|                          |     | (c) Consider use of a flow diagram                                                                                                                                                                           |       |
| Descriptive data         | 14* | (a) Give characteristics of study participants (eg demographic, clinical, social) and information on exposures and potential confounders                                                                     | 10-12 |
|                          |     | (b) Indicate number of participants with missing data for each variable of interest                                                                                                                          | 9     |
| Outcome data             | 15* | Report numbers of outcome events or summary measures                                                                                                                                                         |       |
| Main results             | 16  | (a) Give unadjusted estimates and, if applicable, confounder-adjusted estimates and their precision (eg, 95% confidence interval). Make clear which confounders were adjusted for and why they were included | 12    |
|                          |     | (b) Report category boundaries when continuous variables were categorized                                                                                                                                    | 7-10  |
|                          |     | (c) If relevant, consider translating estimates of relative risk into absolute risk for a meaningful time period                                                                                             | n/a   |
| Other analyses           | 17  | Report other analyses done—eg analyses of subgroups and interactions, and sensitivity analyses                                                                                                               | 14-15 |
| <b>Discussion</b>        |     |                                                                                                                                                                                                              |       |
| Key results              | 18  | Summarise key results with reference to study objectives                                                                                                                                                     | 15    |
| Limitations              | 19  | Discuss limitations of the study, taking into account sources of potential bias or imprecision. Discuss both direction and magnitude of any potential bias                                                   | 16-17 |
| Interpretation           | 20  | Give a cautious overall interpretation of results considering objectives, limitations, multiplicity of analyses, results from similar studies, and other relevant evidence                                   | 16-17 |
| Generalisability         | 21  | Discuss the generalisability (external validity) of the study results                                                                                                                                        | 17    |
| <b>Other information</b> |     |                                                                                                                                                                                                              |       |
| Funding                  | 22  | Give the source of funding and the role of the funders for the present study and, if applicable, for the original study on which the present article is based                                                | 18    |

\*Give information separately for cases and controls in case-control studies and, if applicable, for exposed and unexposed groups in cohort and cross-sectional studies.

**Note:** An Explanation and Elaboration article discusses each checklist item and gives methodological background and published examples of transparent reporting. The STROBE checklist is best used in conjunction with this article (freely available on the Web sites of PLoS Medicine at <http://www.plosmedicine.org/>, Annals of Internal Medicine at <http://www.annals.org/>, and Epidemiology at <http://www.epidem.com/>). Information on the STROBE Initiative is available at [www.strobe-statement.org](http://www.strobe-statement.org).
